# Supplementary material for: Novel hybrids of 1,2,3-triazole-benzoxazole: design, synthesis, and assessment of DprE1 enzyme inhibitors using fluorometric assay and computational analysis
Source: PubMed Central journal article supplement (PMC11441021; doi:10.1080/14756366.2024.2403744), 2024-09-27
Supplement: IENZ_A_2403744_SM3479.pdf [file IENZ_A_2403744_SM3479.pdf]

COMPOUND 3a (BOK-1) SPECTRAL DATA

BOK-1  
1H-NMR in DMSO

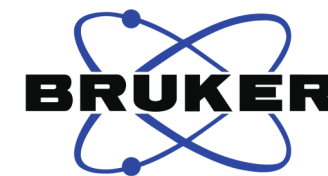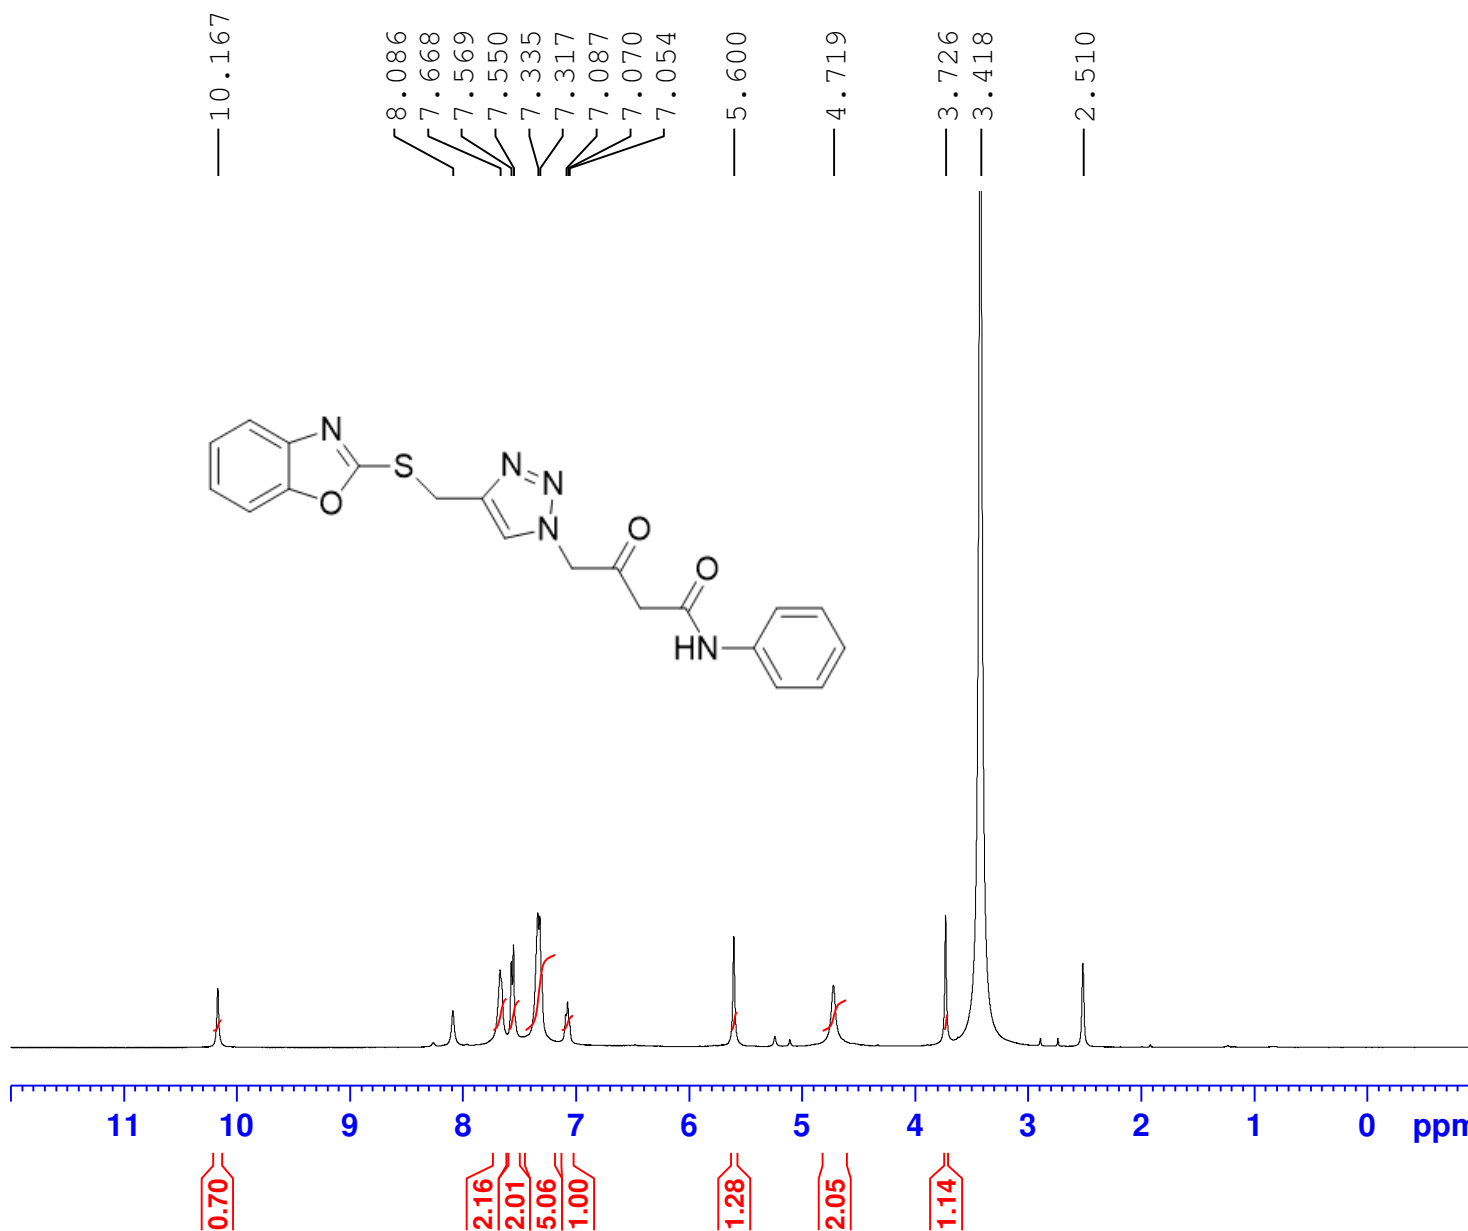

Current Data Parameters  
NAME 23000786-BO-AN  
EXPNO 1  
PROCNO 1

F2 - Acquisition Parameters  
Date\_ 20230801  
Time 8.21 h  
INSTRUM spect  
PROBHD Z108618\_0984 (  
PULPROG zg30  
TD 65536  
SOLVENT DMSO  
NS 16  
DS 2  
SWH 8012.820 Hz  
FIDRES 0.244532 Hz  
AQ 4.0894465 sec  
RG 100.18  
DW 62.400 usec  
DE 17.09 usec  
TE 297.2 K  
D1 1.00000000 sec  
TD0 1  
SF01 400.3124719 MHz  
NUC1 1H  
P0 4.67 usec  
P1 14.00 usec  
PLW1 11.28999996 W

F2 - Processing parameters  
SI 65536  
SF 400.3100000 MHz  
WDW EM  
SSB 0  
LB 0.30 Hz  
GB 0  
PC 1.00

BOK-1  
<sup>13</sup>C-NMR in DMSO

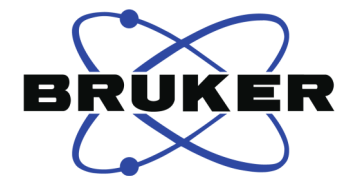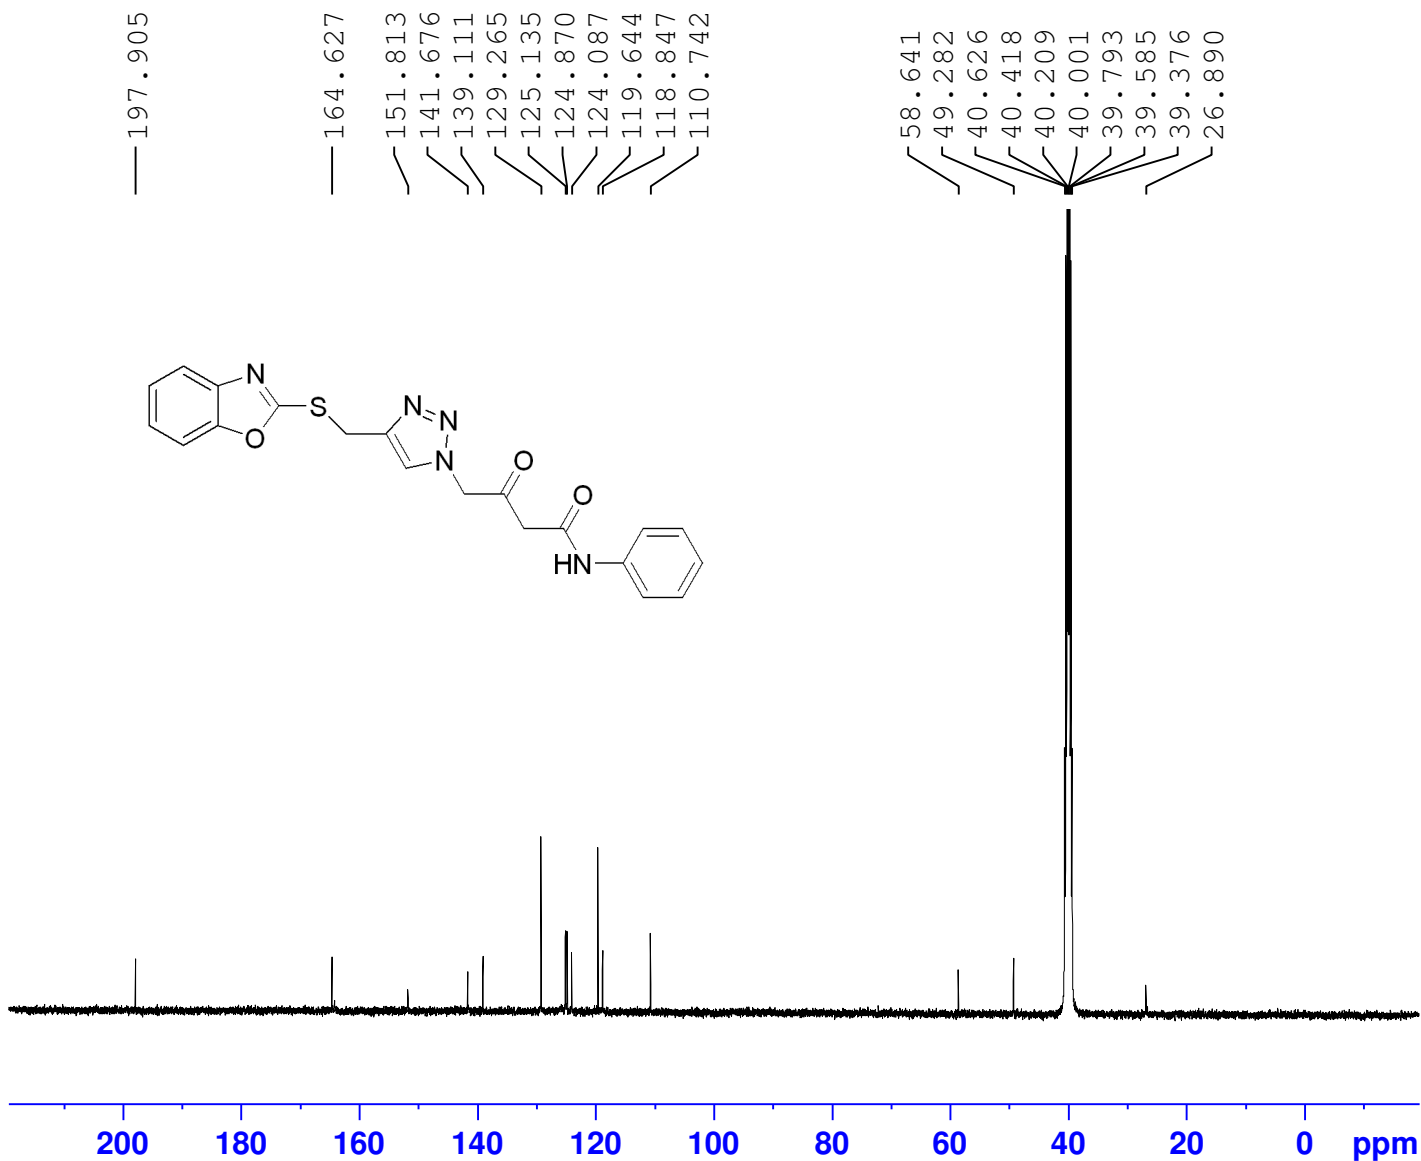

Current Data Parameters  
 NAME 23000786-BO-AN  
 EXPNO 2  
 PROCNO 1

F2 - Acquisition Parameters  
 Date\_ 20230801  
 Time 9.03 h  
 INSTRUM spect  
 PROBHD Z108618\_0984 (  
 PULPROG zgpg30  
 TD 65536  
 SOLVENT DMSO  
 NS 1024  
 DS 4  
 SWH 24038.461 Hz  
 FIDRES 0.733596 Hz  
 AQ 1.3631488 sec  
 RG 2050  
 DW 20.800 usec  
 DE 6.50 usec  
 TE 298.2 K  
 D1 1.00000000 sec  
 D11 0.03000000 sec  
 TD0 1  
 SFO1 100.6680954 MHz  
 NUC1 13C  
 P0 3.33 usec  
 P1 10.00 usec  
 PLW1 51.02600098 W  
 SFO2 400.3116012 MHz  
 NUC2 1H  
 CPDPRG[2] waltz65  
 PCPD2 90.00 usec  
 PLW2 11.28999996 W  
 PLW12 0.27318001 W  
 PLW13 0.13741000 W

F2 - Processing parameters  
 SI 32768  
 SF 100.6580296 MHz  
 WDW EM  
 SSB 0  
 LB 1.00 Hz  
 GB 0  
 PC 1.40

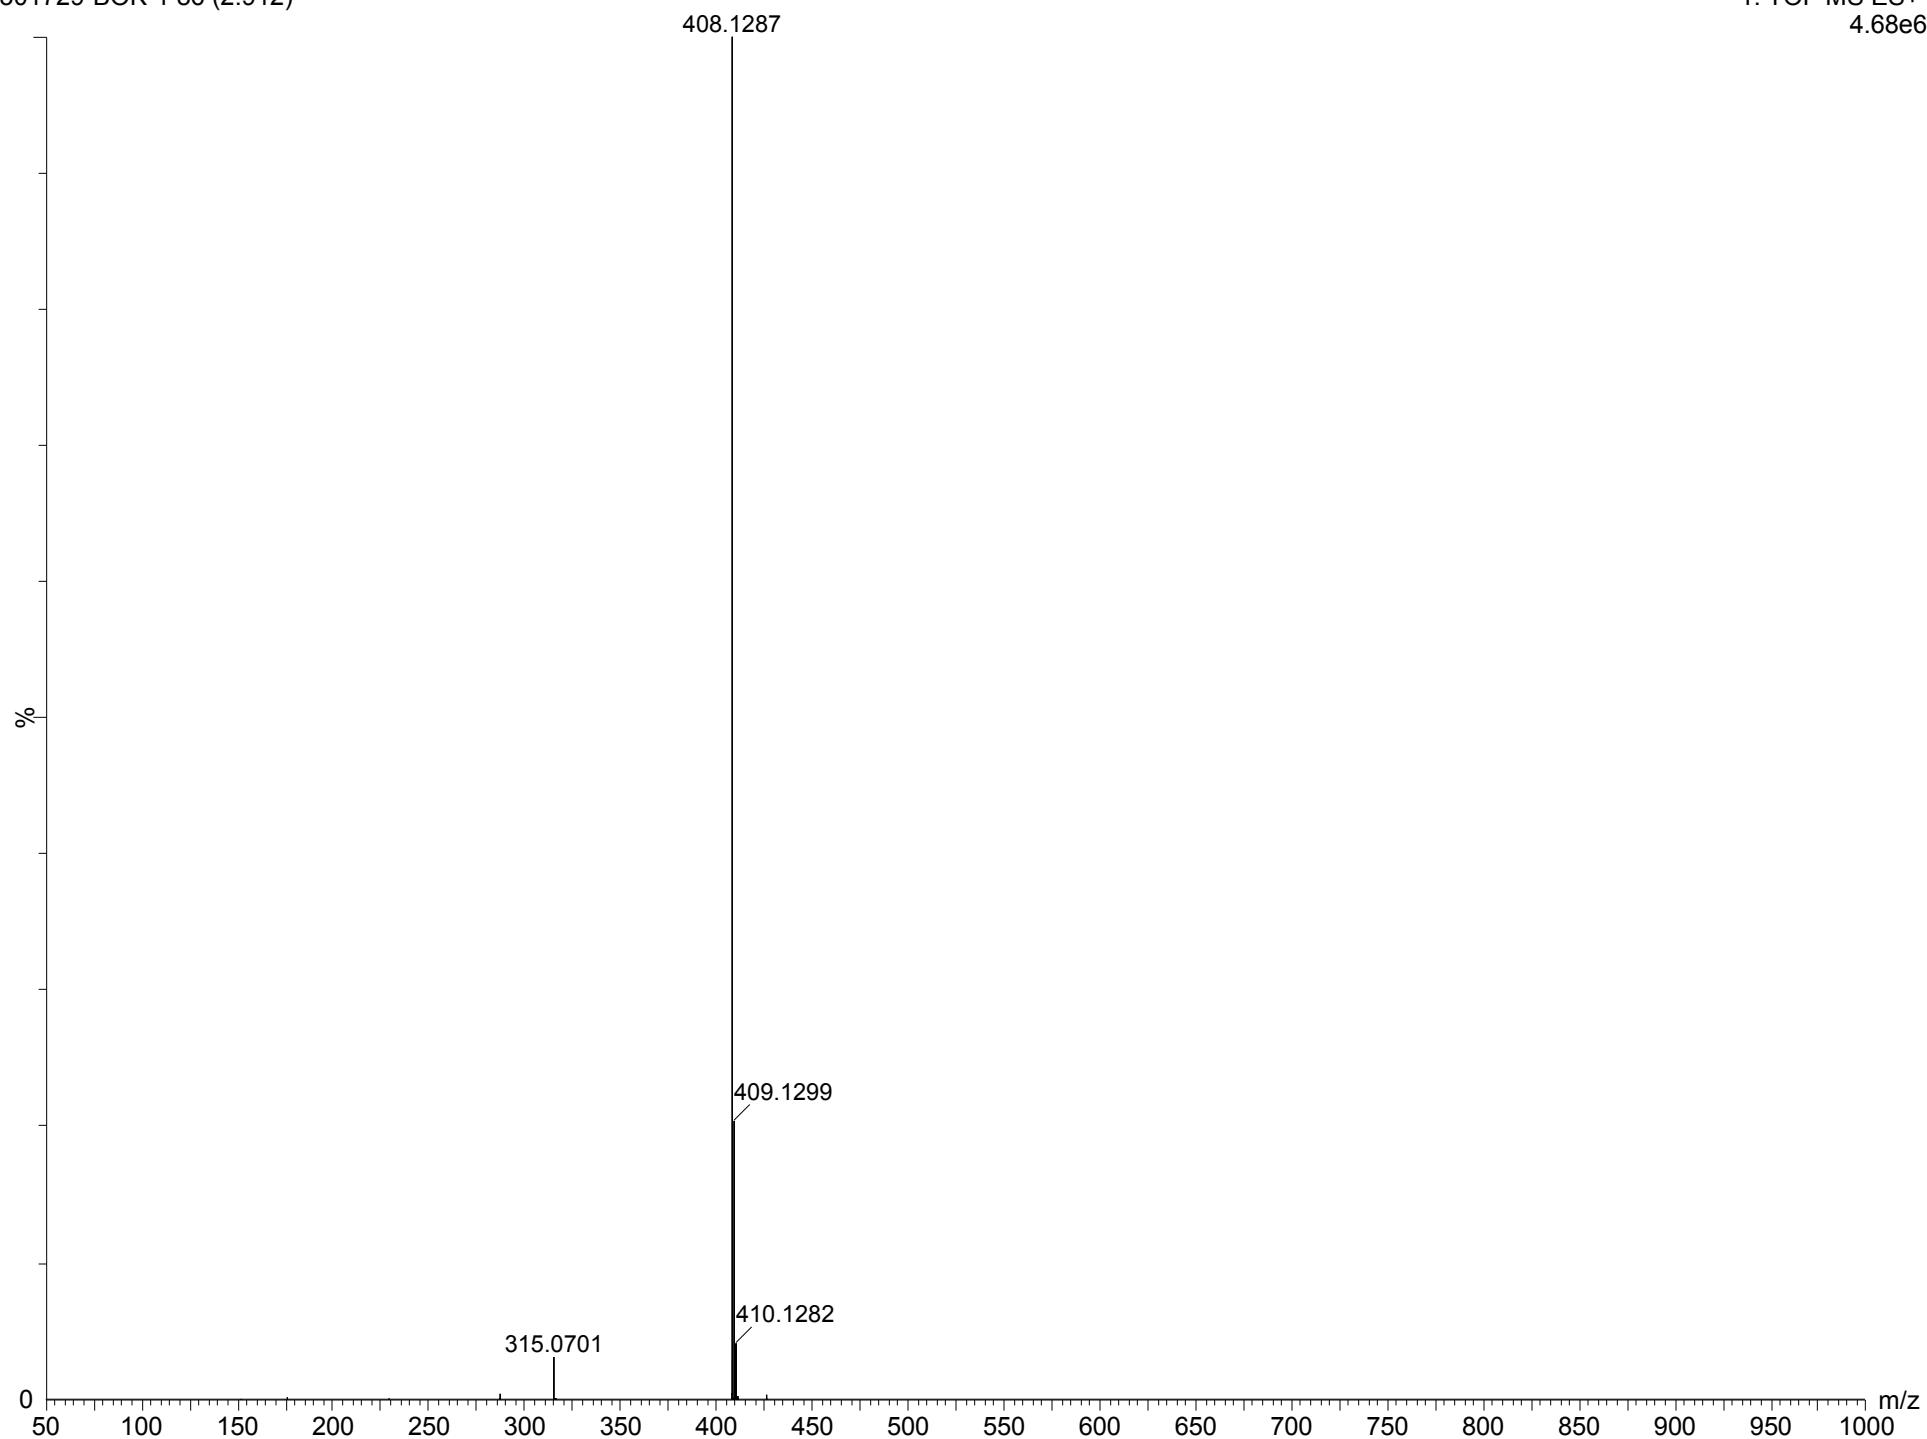

Mass spectrum of 4-((benzo[d]oxazol-2-ylthio)methyl)-1H-1,2,3-triazol-1-yl)-3-oxo-N-phenyl butanamide **3a (BOK-1)**

# COMPOUND 3b (BOK-2) SPECTRAL DATA

BOK-2  
1H-NMR in DMSO

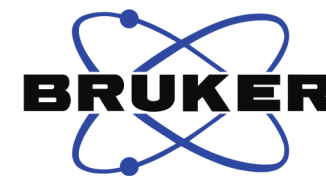

9.524  
8.098  
7.672  
7.656  
7.425  
7.406  
7.347  
7.223  
7.205  
7.183  
7.165  
7.147  
7.111  
7.093  
7.077  
5.597  
4.720  
3.756  
3.392  
2.510  
2.192

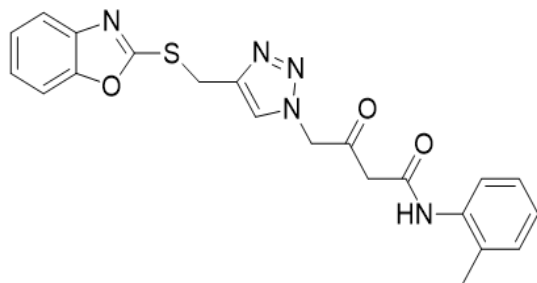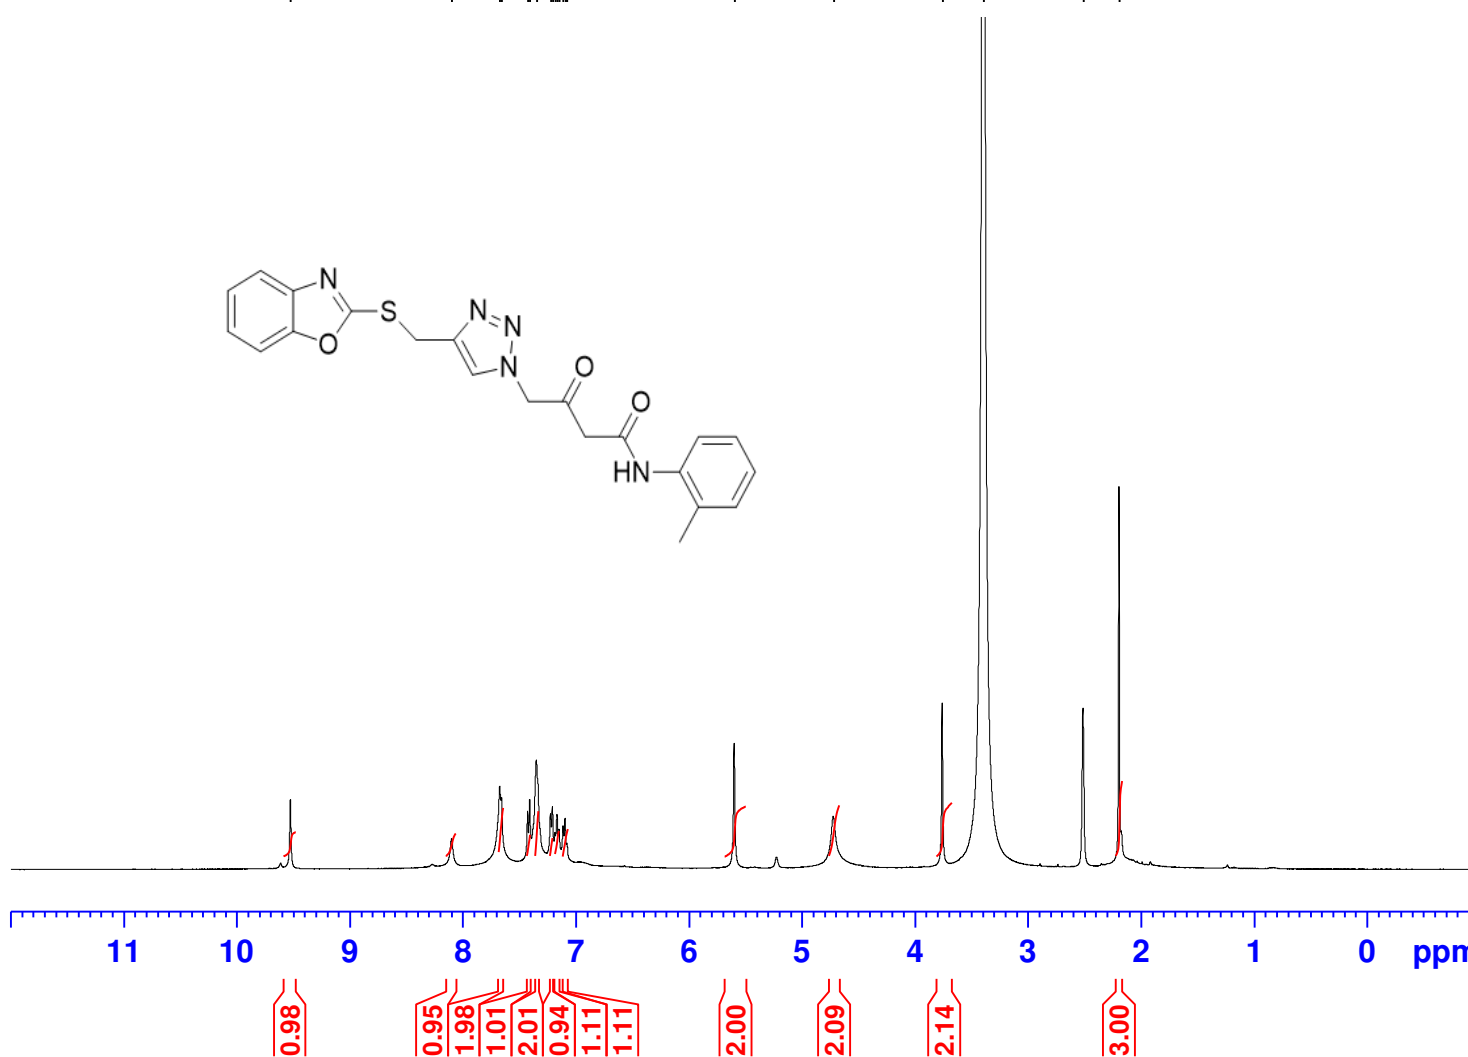

Current Data Parameters  
NAME 23000780-BO-2CH3  
EXPNO 10  
PROCNO 1

F2 - Acquisition Parameters  
Date\_ 20230803  
Time 10.03 h  
INSTRUM spect  
PROBHD Z108618\_0984 (  
PULPROG zg30  
TD 65536  
SOLVENT DMSO  
NS 16  
DS 2  
SWH 8012.820 Hz  
FIDRES 0.244532 Hz  
AQ 4.0894465 sec  
RG 32.13  
DW 62.400 usec  
DE 17.09 usec  
TE 300.4 K  
D1 1.00000000 sec  
TD0 1  
SF01 400.3124719 MHz  
NUC1 1H  
P0 4.67 usec  
P1 14.00 usec  
PLW1 11.28999996 W

F2 - Processing parameters  
SI 65536  
SF 400.3100000 MHz  
WDW EM  
SSB 0  
LB 0.30 Hz  
GB 0  
PC 1.00

BOK-2  
<sup>13</sup>C-NMR in DMSO

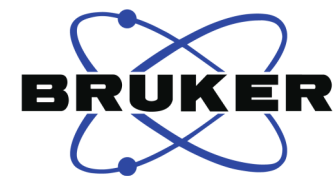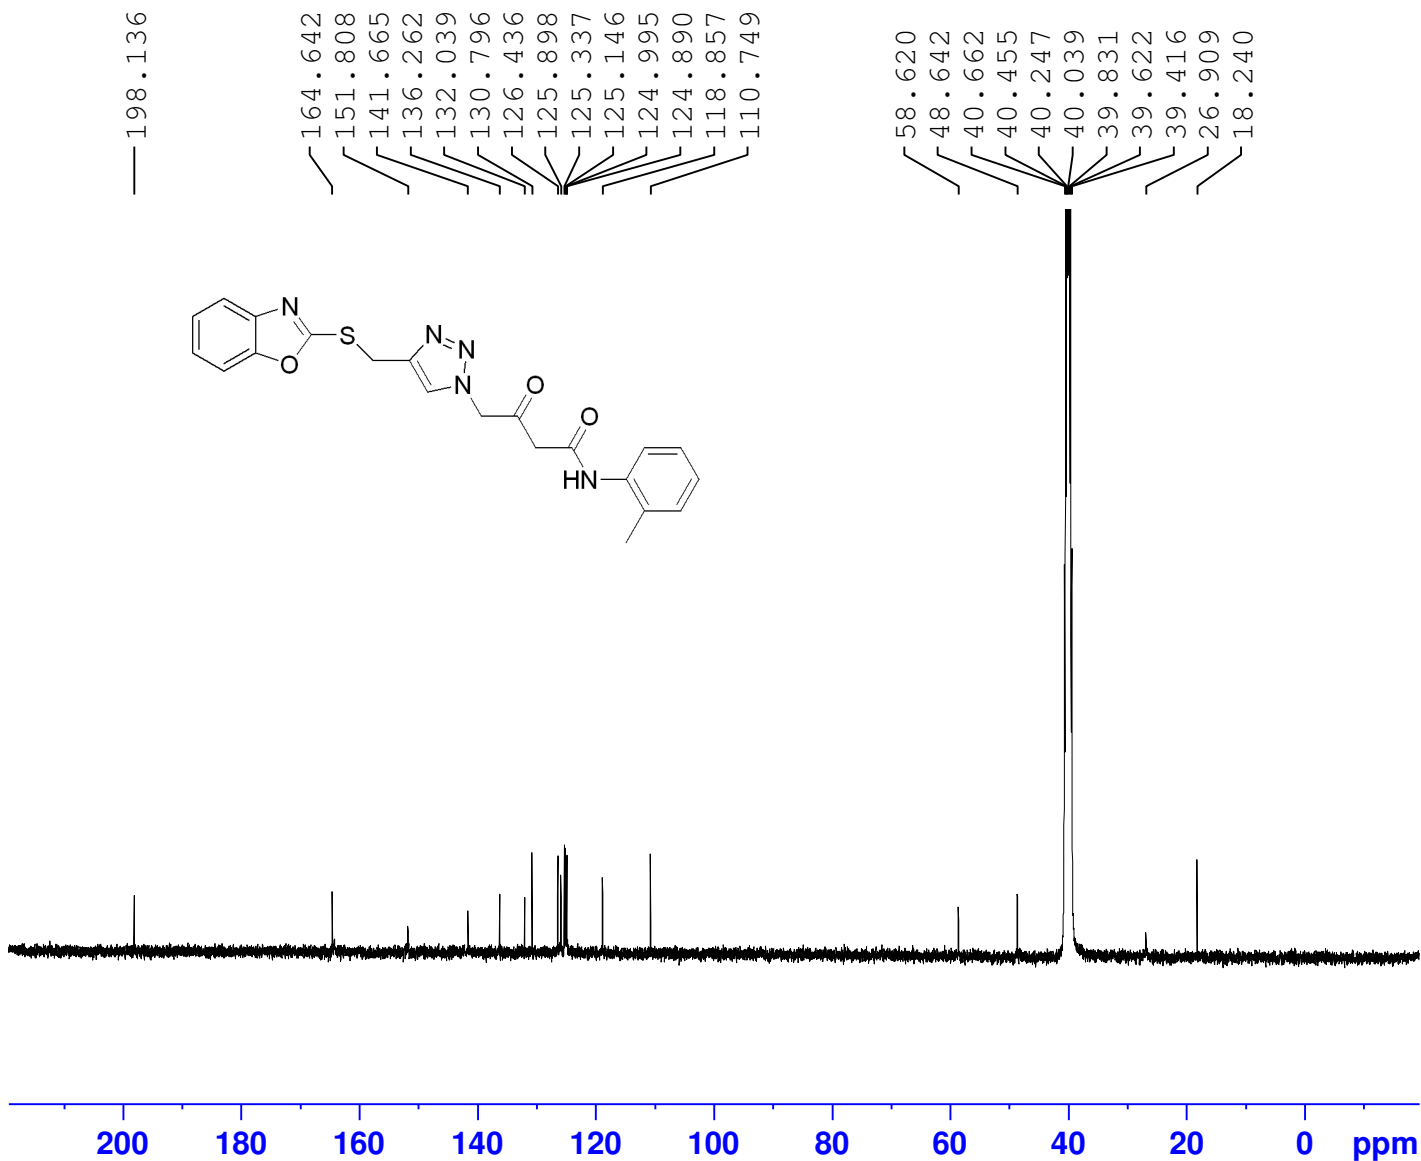

Current Data Parameters  
 NAME 23000780-BO-2CH3  
 EXPNO 2  
 PROCNO 1

F2 - Acquisition Parameters  
 Date\_ 20230801  
 Time 5.07 h  
 INSTRUM spect  
 PROBHD Z108618\_0984 (  
 PULPROG zgpg30  
 TD 65536  
 SOLVENT DMSO  
 NS 1024  
 DS 4  
 SWH 24038.461 Hz  
 FIDRES 0.733596 Hz  
 AQ 1.3631488 sec  
 RG 2050  
 DW 20.800 usec  
 DE 6.50 usec  
 TE 298.1 K  
 D1 1.00000000 sec  
 D11 0.03000000 sec  
 TD0 1  
 SFO1 100.6680954 MHz  
 NUC1 13C  
 P0 3.33 usec  
 P1 10.00 usec  
 PLW1 51.02600098 W  
 SFO2 400.3116012 MHz  
 NUC2 1H  
 CPDPRG[2] waltz65  
 PCPD2 90.00 usec  
 PLW2 11.28999996 W  
 PLW12 0.27318001 W  
 PLW13 0.13741000 W

F2 - Processing parameters  
 SI 32768  
 SF 100.6580296 MHz  
 WDW EM  
 SSB 0  
 LB 1.00 Hz  
 GB 0  
 PC 1.40

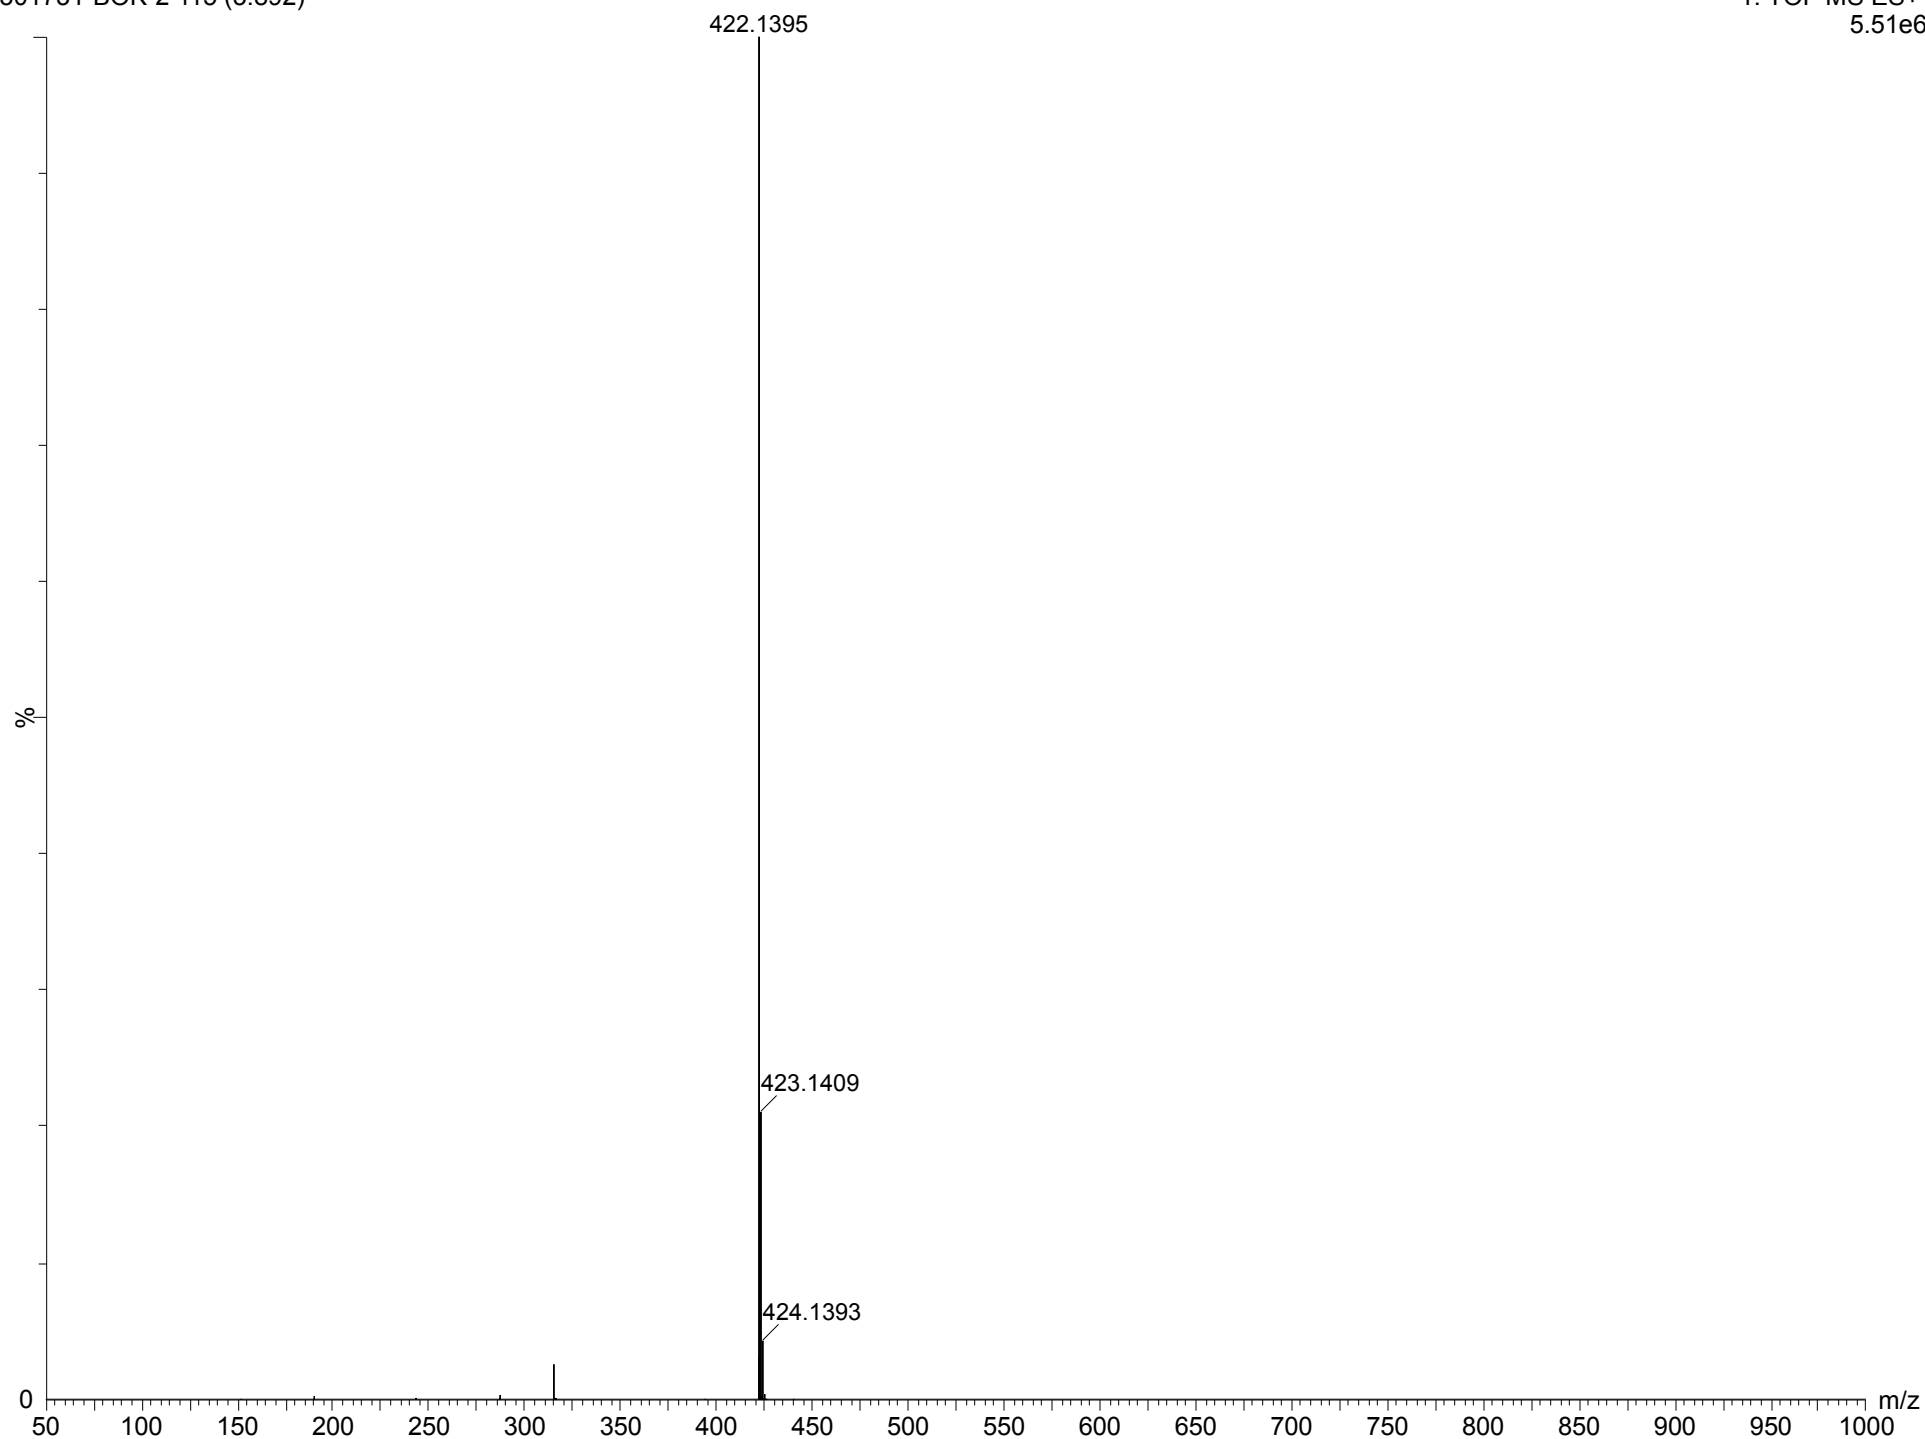

Mass spectrum of 4-(4-((benzo[d]oxazol-2-ylthio)methyl)-1H-1,2,3-triazol-1-yl)-3-oxo-N-(o-tolyl) butanamide 3b (BOK-2).

COMPOUND 3c (BOK-3) SPECTRAL DATA

BOK-3  
<sup>1</sup>H-NMR in DMSO

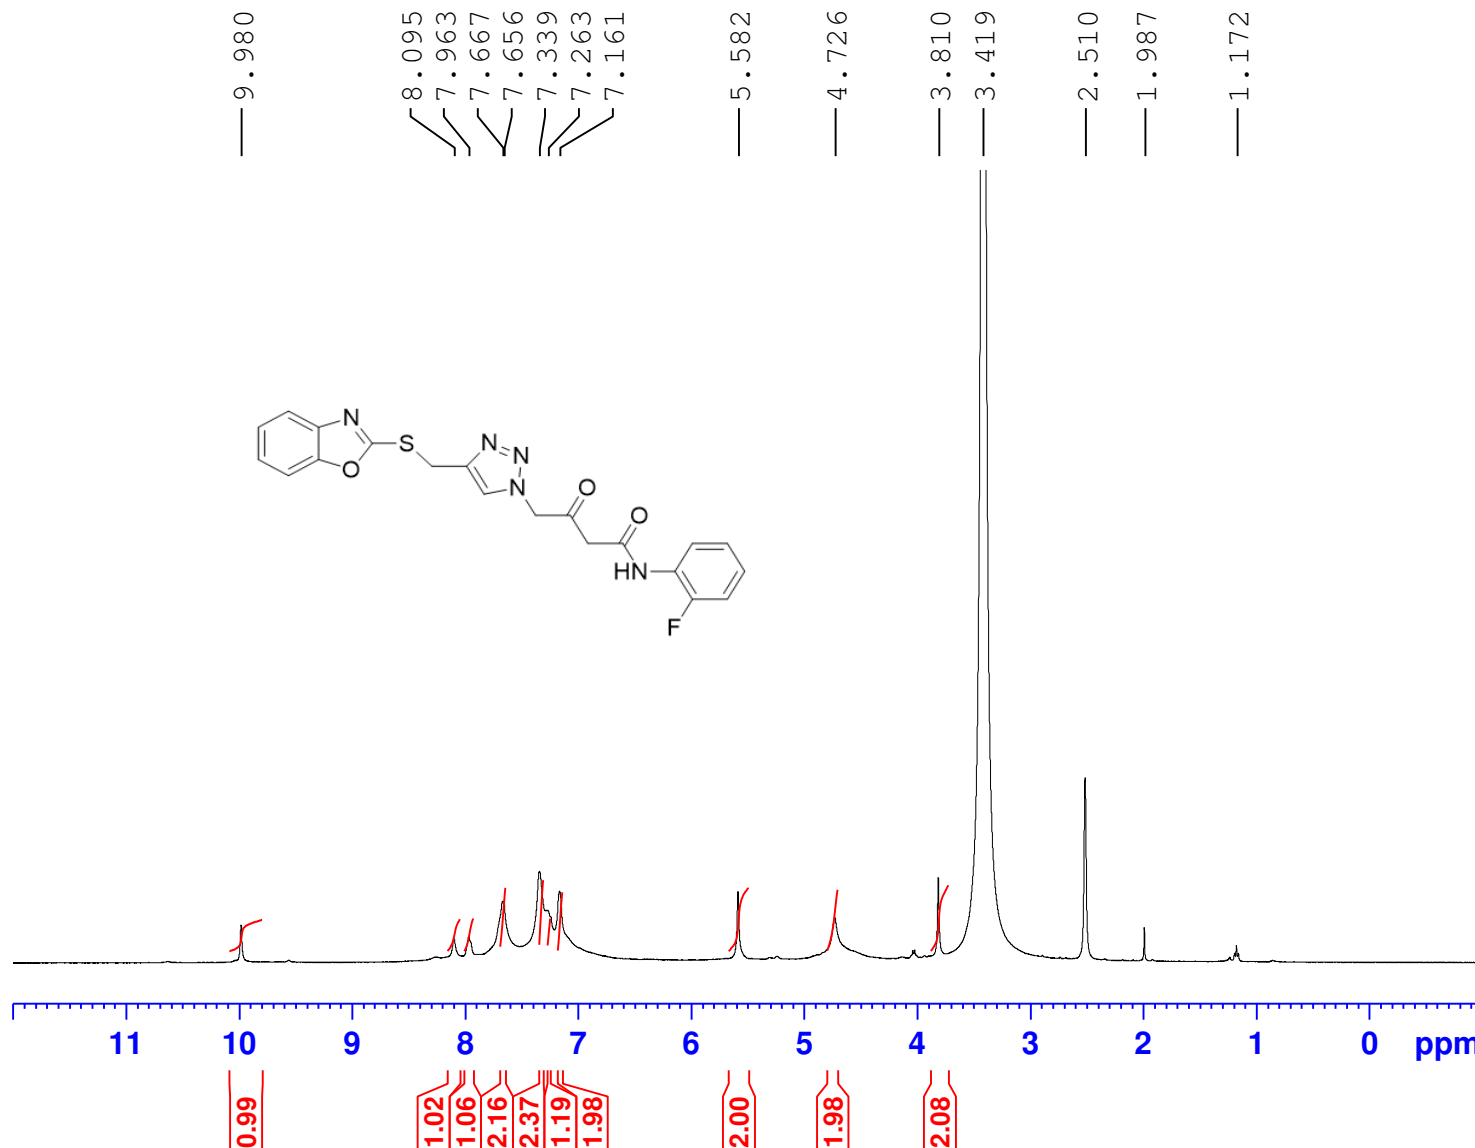

Current Data Parameters  
 NAME 23000784-BO-2F  
 EXPNO 1  
 PROCNO 1

F2 - Acquisition Parameters  
 Date\_ 20230801  
 Time 7.30 h  
 INSTRUM spect  
 PROBHD Z108618\_0984 (  
 PULPROG zg30  
 TD 65536  
 SOLVENT DMSO  
 NS 16  
 DS 2  
 SWH 8012.820 Hz  
 FIDRES 0.244532 Hz  
 AQ 4.0894465 sec  
 RG 114.18  
 DW 62.400 usec  
 DE 17.09 usec  
 TE 297.2 K  
 D1 1.00000000 sec  
 TD0 1  
 SFO1 400.3124719 MHz  
 NUC1 1H  
 P0 4.67 usec  
 P1 14.00 usec  
 PLW1 11.28999996 W

F2 - Processing parameters  
 SI 65536  
 SF 400.3100000 MHz  
 WDW EM  
 SSB 0  
 LB 0.30 Hz  
 GB 0  
 PC 1.00

BOK-3  
<sup>13</sup>C-NMR in DMSO

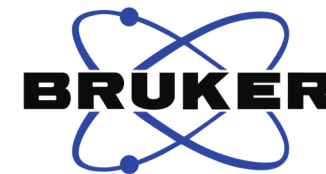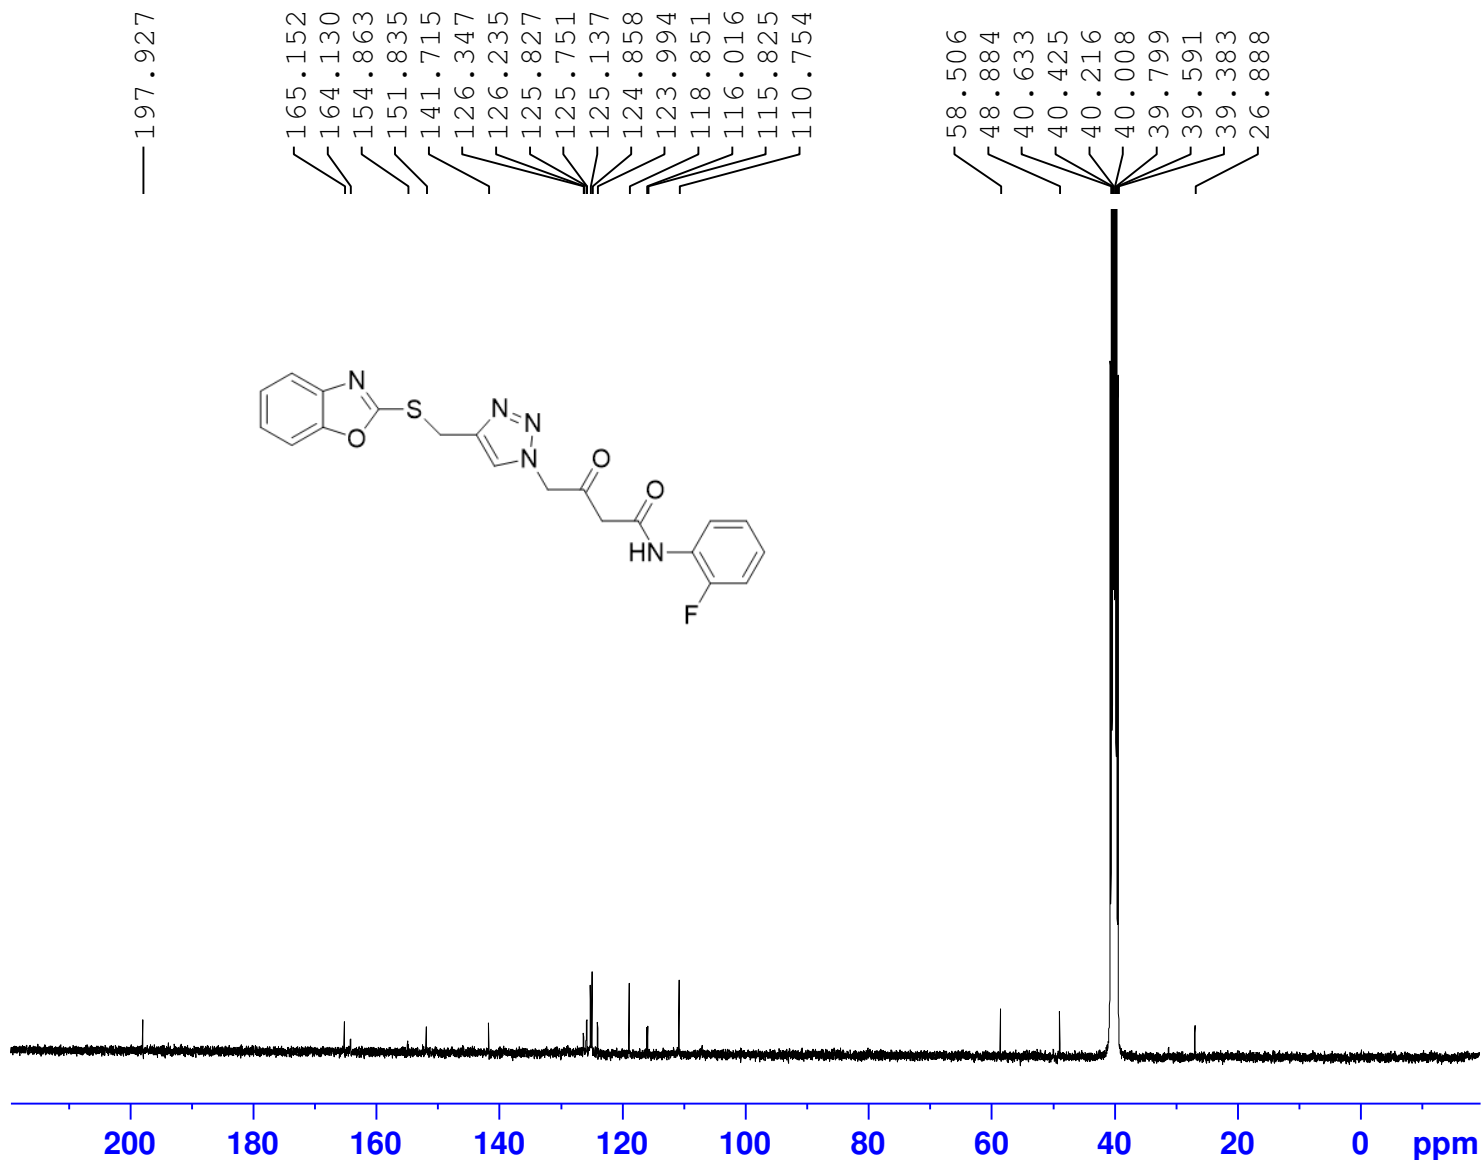

Current Data Parameters  
 NAME 23000847-BO-2F  
 EXPNO 2  
 PROCNO 1

F2 - Acquisition Parameters  
 Date\_ 20230817  
 Time 21.11 h  
 INSTRUM spect  
 PROBHD Z108618\_0984 (  
 PULPROG zgpg30  
 TD 65536  
 SOLVENT DMSO  
 NS 3000  
 DS 4  
 SWH 24038.461 Hz  
 FIDRES 0.733596 Hz  
 AQ 1.3631488 sec  
 RG 202.84  
 DW 20.800 usec  
 DE 6.50 usec  
 TE 298.1 K  
 D1 1.00000000 sec  
 D11 0.03000000 sec  
 TD0 1  
 SFO1 100.6680954 MHz  
 NUC1 <sup>13</sup>C  
 P0 3.33 usec  
 P1 10.00 usec  
 PLW1 51.02600098 W  
 SFO2 400.3116012 MHz  
 NUC2 <sup>1</sup>H  
 CPDPRG[2] waltz65  
 PCPD2 90.00 usec  
 PLW2 11.28999996 W  
 PLW12 0.27318001 W  
 PLW13 0.13741000 W

F2 - Processing parameters  
 SI 32768  
 SF 100.6580296 MHz  
 WDW EM  
 SSB 0  
 LB 1.00 Hz  
 GB 0  
 PC 1.40

<sup>13</sup>C NMR spectrum of 4-(4-((benzo[d]oxazol-2-ylthio)methyl)-1H-1,2,3-triazol-1-yl)-N-(2-fluorophenyl)-3-oxobutanamide **3c** (BOK-3).



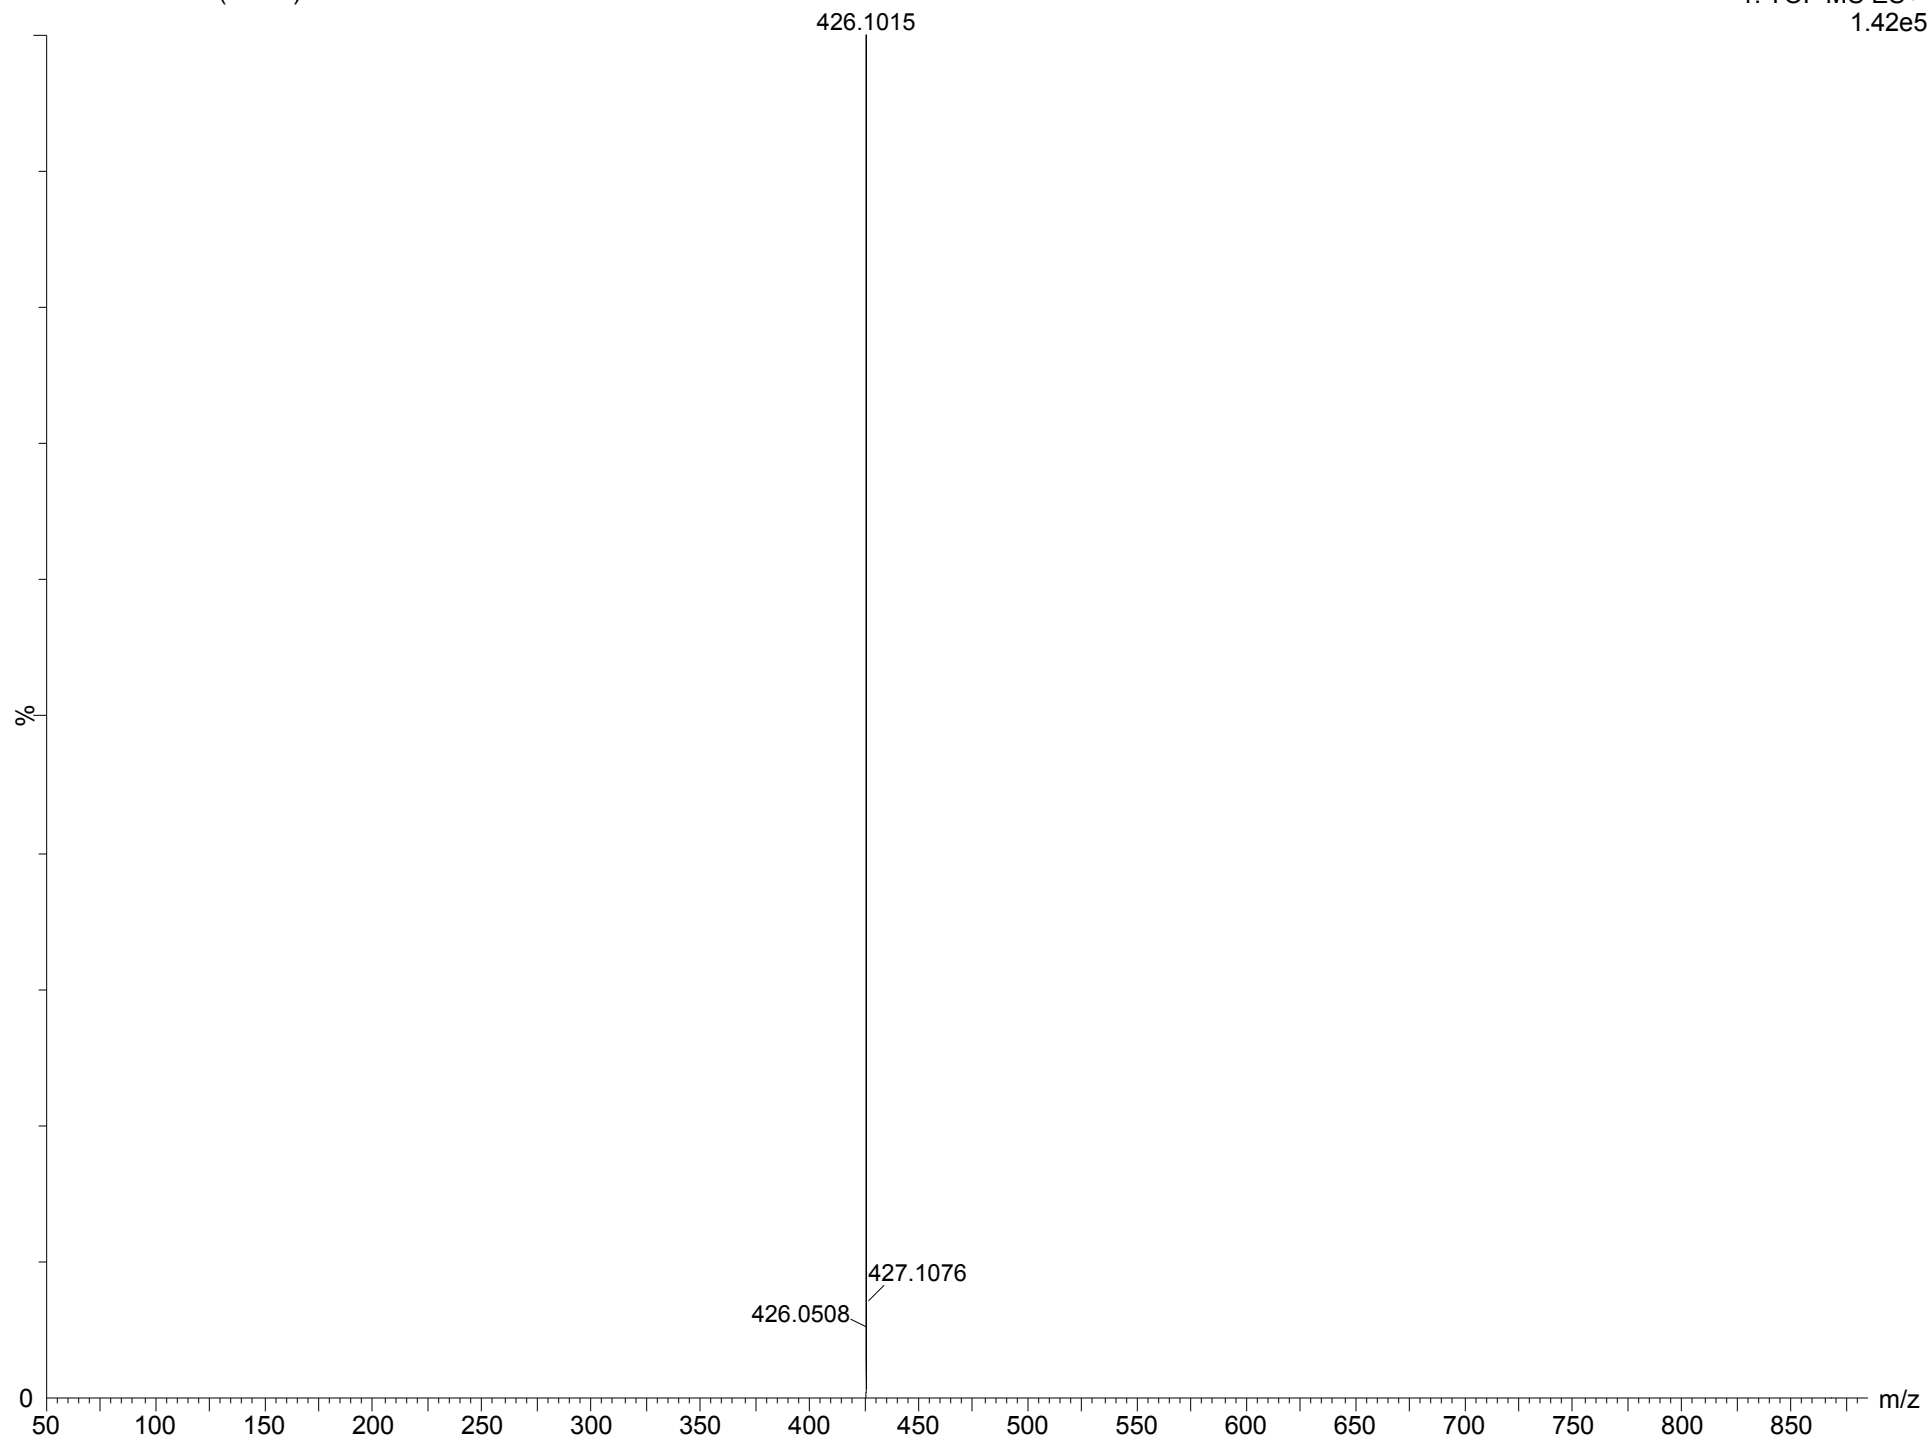

# COMPOUND 3d (BOK-4) SPECTRAL DATA

BOK-4

<sup>1</sup>H-NMR in DMSO

**Chroma**gen  
Analytical Solutions

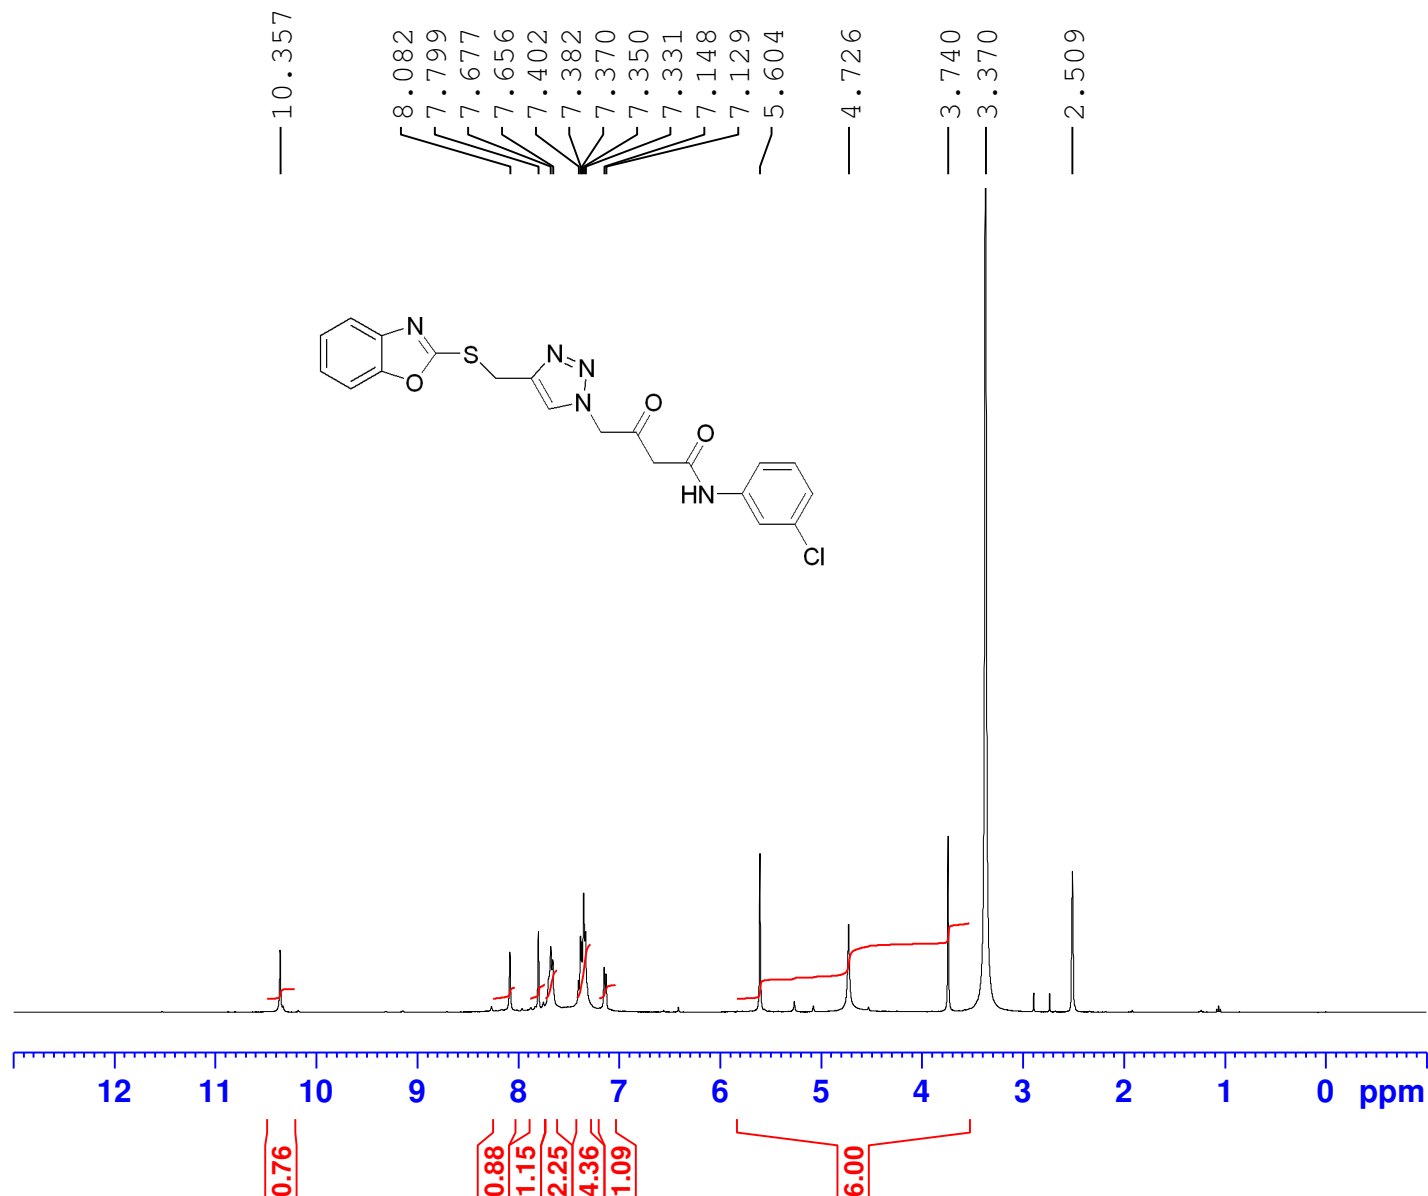

Current Data Parameters  
NAME 23000836-BO-3C1  
EXPNO 1  
PROCNO 1

F2 - Acquisition Parameters  
Date\_ 20230814  
Time 17.56 h  
INSTRUM spect  
PROBHD Z108618\_0984 (  
PULPROG zg30  
TD 65536  
SOLVENT DMSO  
NS 16  
DS 2  
SWH 8012.820 Hz  
FIDRES 0.244532 Hz  
AQ 4.0894465 sec  
RG 160.67  
DW 62.400 usec  
DE 17.09 usec  
TE 297.8 K  
D1 1.0000000 sec  
TD0 1  
SFO1 400.3124719 MHz  
NUC1 1H  
P0 4.67 usec  
P1 14.00 usec  
PLW1 11.28999996 W

F2 - Processing parameters  
SI 65536  
SF 400.3100000 MHz  
WDW EM  
SSB 0  
LB 0.30 Hz  
GB 0  
PC 1.00

<sup>1</sup>H NMR spectrum of 4-(4-((benzo[d]oxazol-2-ylthio)methyl)-1H-1,2,3-triazol-1-yl)-N-(3-chlorophenyl)-3-oxobutanamide **3d (BOK-4)**

BOK-4  
<sup>13</sup>C-NMR in DMSO

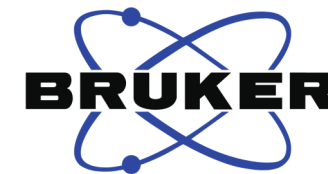

197.711

165.064  
 164.184  
 151.823  
 141.691  
 140.531  
 133.584  
 131.007  
 125.135  
 124.864  
 123.800  
 119.119  
 118.851  
 118.007  
 110.750

58.608  
 49.292  
 40.673  
 40.465  
 40.257  
 40.048  
 39.840  
 39.632  
 39.424  
 26.885

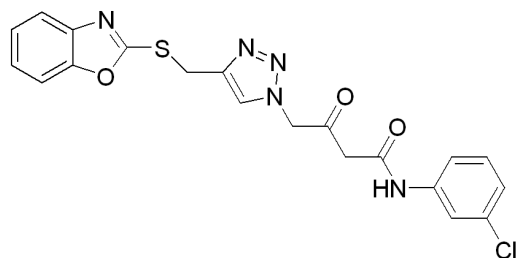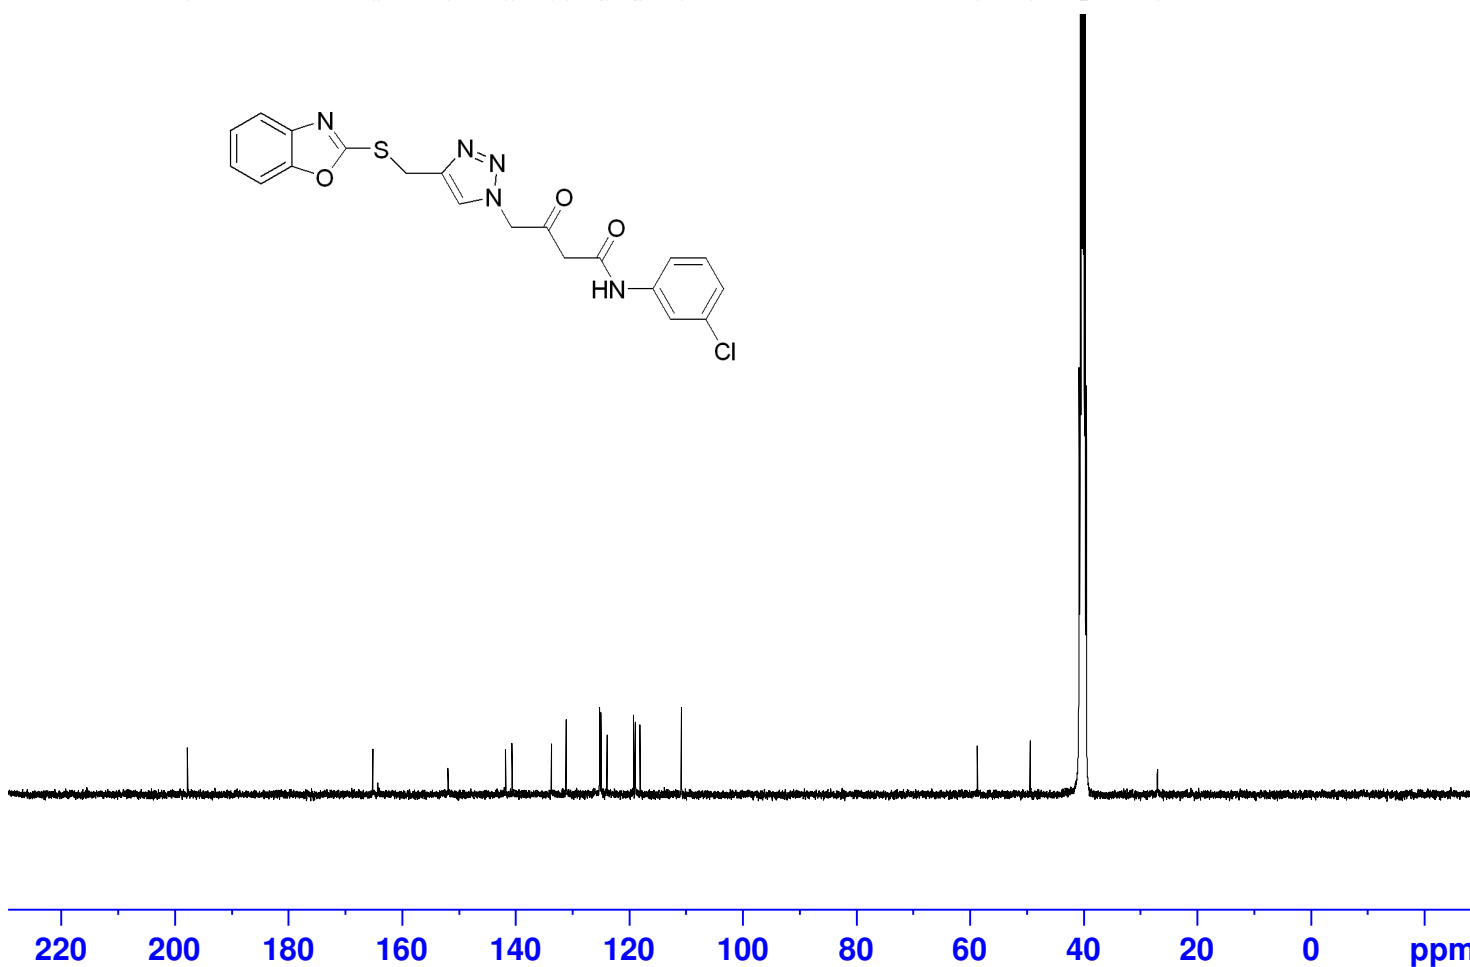

Current Data Parameters  
 NAME 23000836-BO-3C1  
 EXPNO 2  
 PROCNO 1

F2 - Acquisition Parameters  
 Date\_ 20230816  
 Time 11.22 h  
 INSTRUM spect  
 PROBHD Z108618\_0984 (  
 PULPROG zgpg30  
 TD 65536  
 SOLVENT DMSO  
 NS 2048  
 DS 4  
 SWH 26041.666 Hz  
 FIDRES 0.794729 Hz  
 AQ 1.2582912 sec  
 RG 202.84  
 DW 19.200 usec  
 DE 6.50 usec  
 TE 298.0 K  
 D1 1.0000000 sec  
 D11 0.0300000 sec  
 TD0 1  
 SFO1 100.6680954 MHz  
 NUC1 13C  
 P0 3.33 usec  
 P1 10.00 usec  
 PLW1 51.02600098 W  
 SFO2 400.3116012 MHz  
 NUC2 1H  
 CPDPRG[2] waltz65  
 PCPD2 90.00 usec  
 PLW2 11.28999996 W  
 PLW12 0.27318001 W  
 PLW13 0.13741000 W

F2 - Processing parameters  
 SI 32768  
 SF 100.6580296 MHz  
 WDW EM  
 SSB 0  
 LB 1.00 Hz  
 GB 0  
 PC 1.40

<sup>13</sup>C NMR spectrum of 4-(4-((benzo[d]oxazol-2-ylthio)methyl)-1H-1,2,3-triazol-1-yl)-N-(3-chlorophenyl)-3-oxobutanamide **3d** (BOK-4).

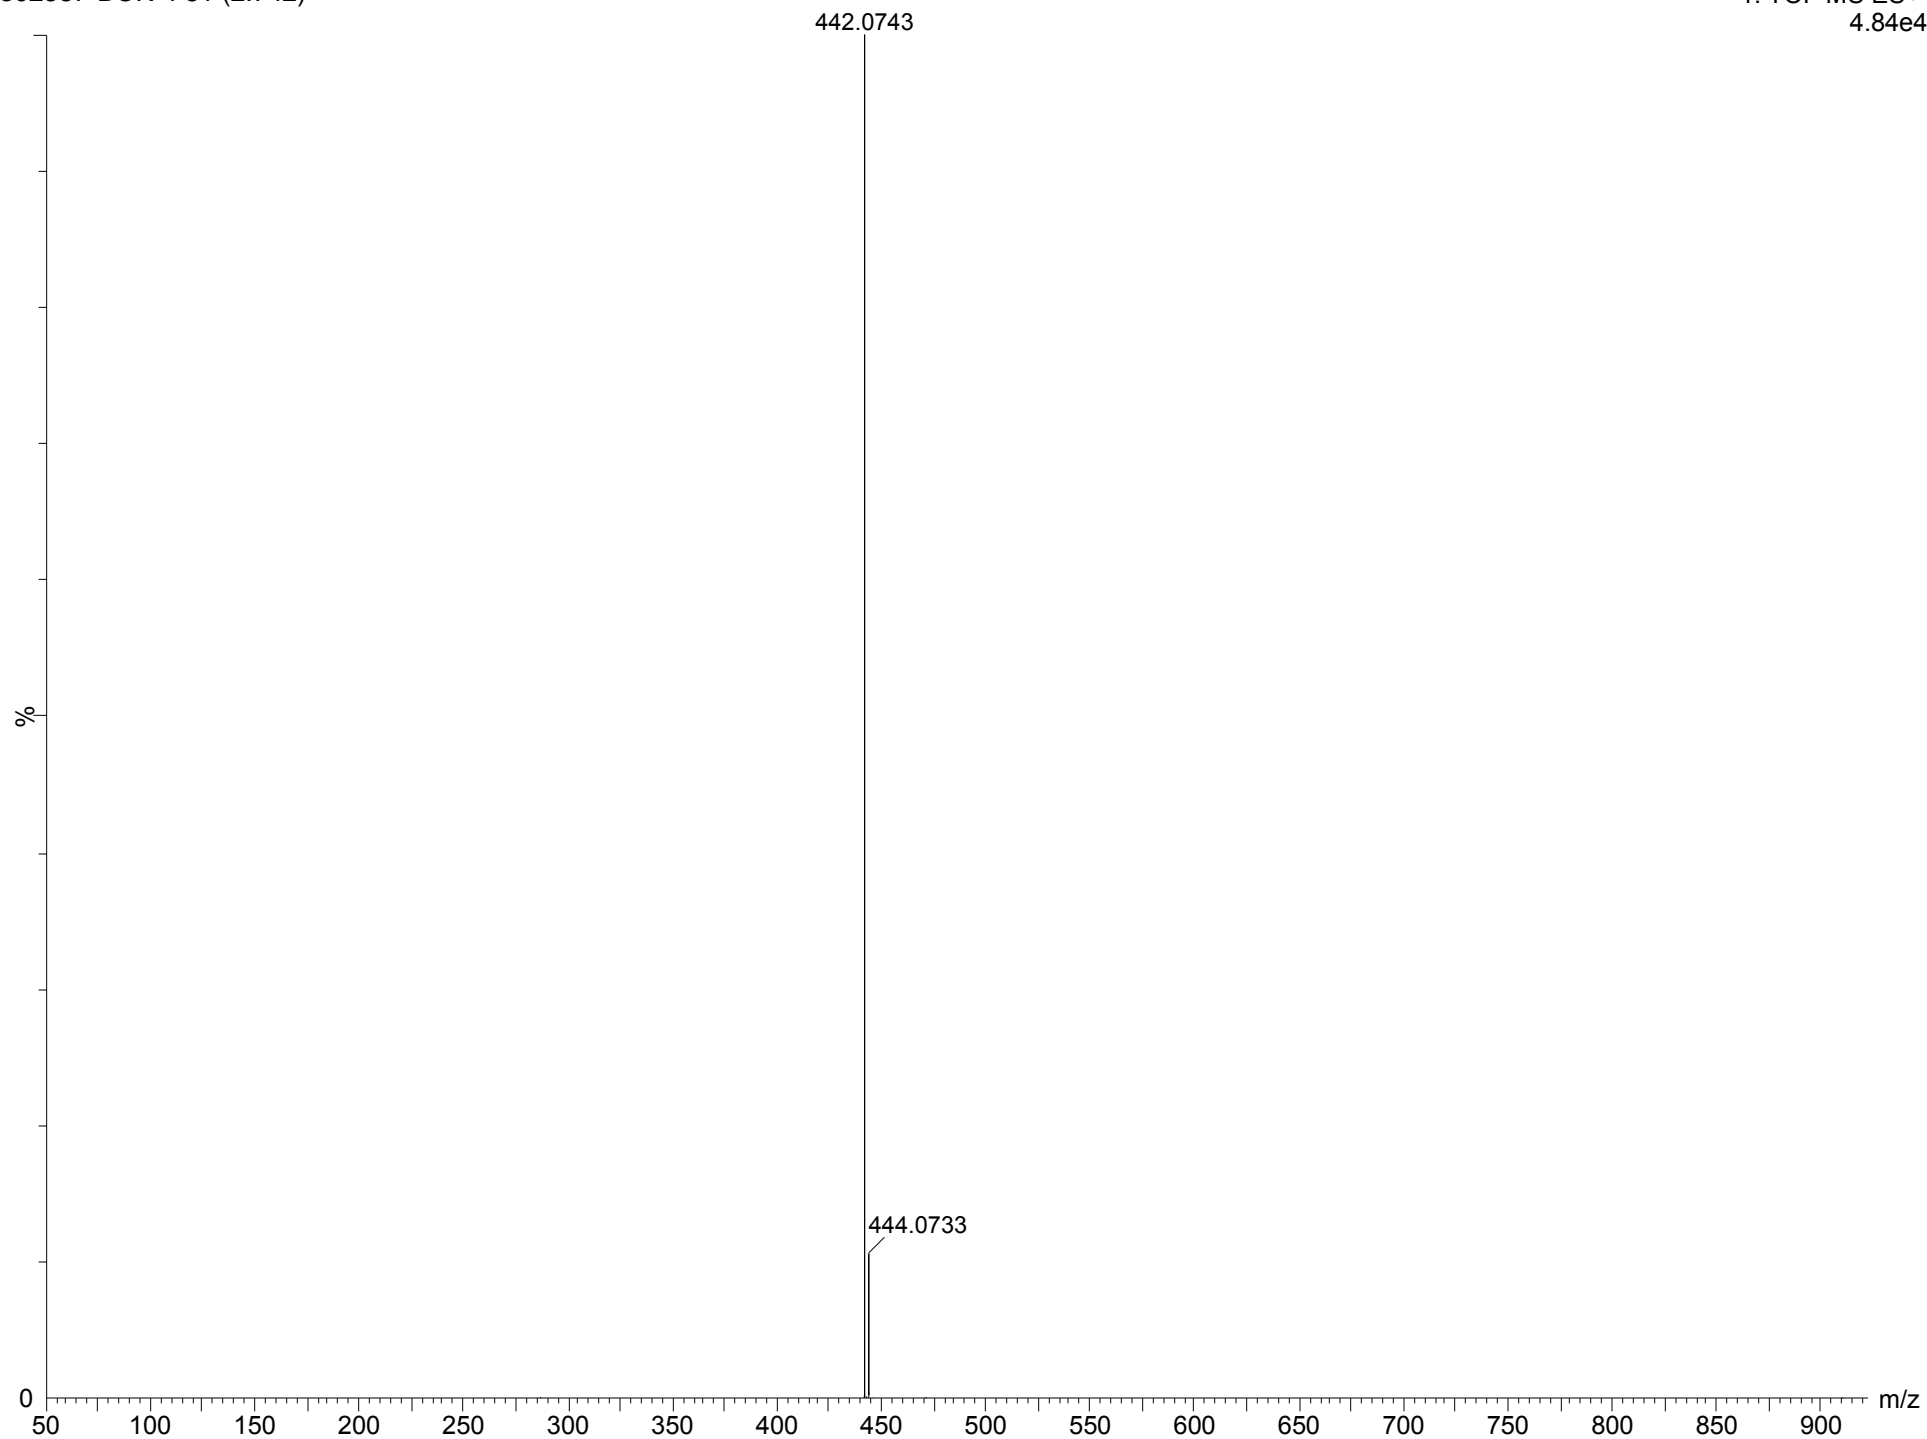

# COMPOUND 3e (BOK-5) SPECTRAL DATA

BOK-5  
<sup>1</sup>H-NMR in DMSO



— 10.091  
 8.085  
 7.662  
 7.460  
 7.441  
 7.338  
 7.124  
 7.105  
 — 5.606  
 — 4.723  
 — 3.715  
 — 3.446  
 — 2.511  
 — 2.245

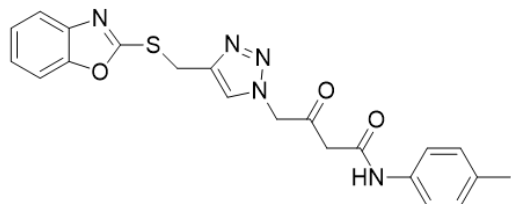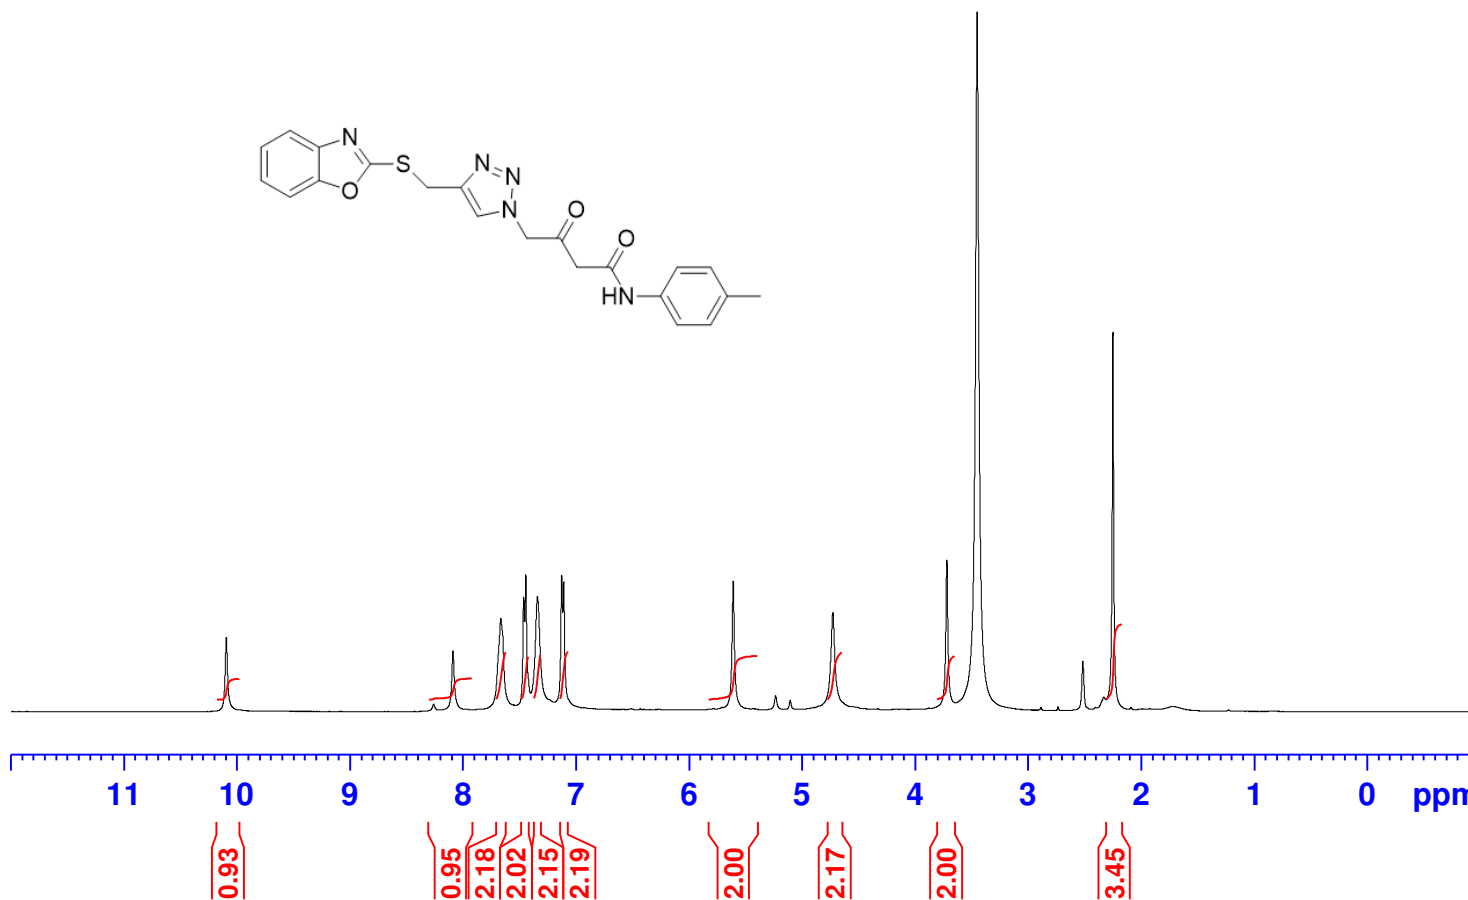

Current Data Parameters  
 NAME 23000781-BO-4CH3  
 EXPNO 1  
 PROCNO 1

F2 - Acquisition Parameters  
 Date\_ 20230801  
 Time 5.11 h  
 INSTRUM spect  
 PROBHD Z108618\_0984 (  
 PULPROG zg30  
 TD 65536  
 SOLVENT DMSO  
 NS 16  
 DS 2  
 SWH 8012.820 Hz  
 FIDRES 0.244532 Hz  
 AQ 4.0894465 sec  
 RG 65.15  
 DW 62.400 usec  
 DE 17.09 usec  
 TE 297.0 K  
 D1 1.00000000 sec  
 TD0 1  
 SF01 400.3124719 MHz  
 NUC1 1H  
 P0 4.67 usec  
 P1 14.00 usec  
 PLW1 11.28999996 W

F2 - Processing parameters  
 SI 65536  
 SF 400.3100000 MHz  
 WDW EM  
 SSB 0  
 LB 0.30 Hz  
 GB 0  
 PC 1.00

BOK-5  
<sup>13</sup>C-NMR in DMSO

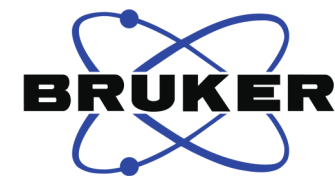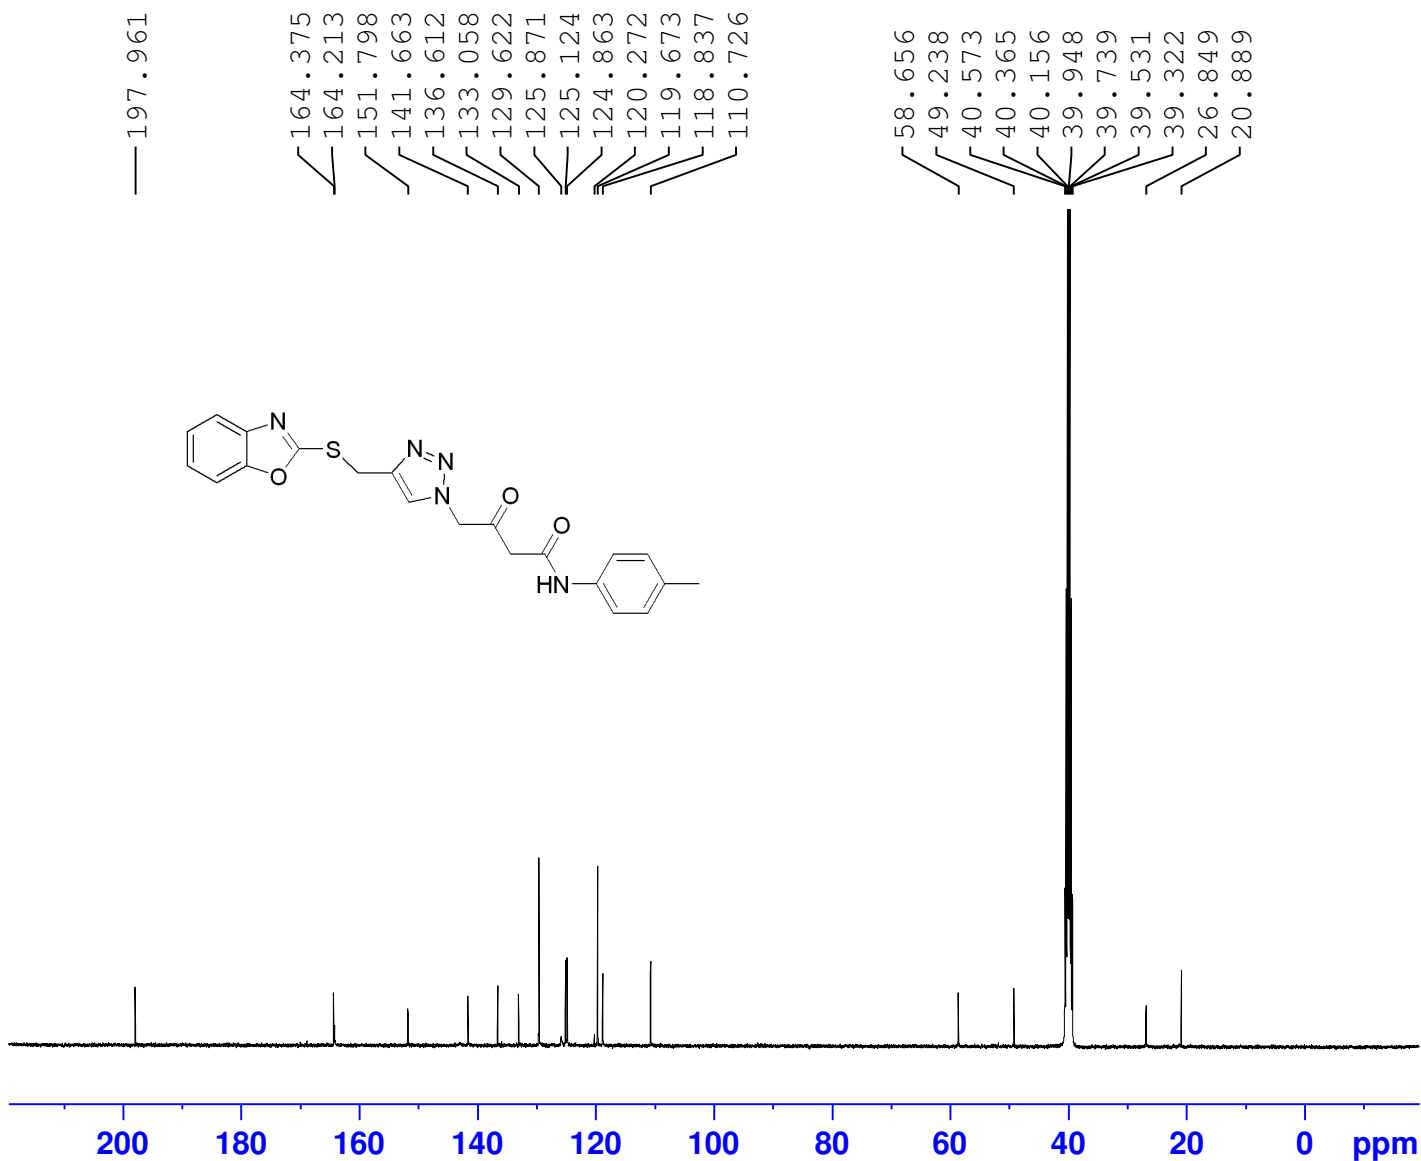

Current Data Parameters  
 NAME 23000781-BO-4CH3  
 EXPNO 2  
 PROCNO 1

F2 - Acquisition Parameters  
 Date\_ 20230801  
 Time 5.53 h  
 INSTRUM spect  
 PROBHD Z108618\_0984 (  
 PULPROG zgpg30  
 TD 65536  
 SOLVENT DMSO  
 NS 1024  
 DS 4  
 SWH 24038.461 Hz  
 FIDRES 0.733596 Hz  
 AQ 1.3631488 sec  
 RG 2050  
 DW 20.800 usec  
 DE 6.50 usec  
 TE 297.9 K  
 D1 1.00000000 sec  
 D11 0.03000000 sec  
 TD0 1  
 SFO1 100.6680954 MHz  
 NUC1 13C  
 P0 3.33 usec  
 P1 10.00 usec  
 PLW1 51.02600098 W  
 SFO2 400.3116012 MHz  
 NUC2 1H  
 CPDPRG[2] waltz65  
 PCPD2 90.00 usec  
 PLW2 11.28999996 W  
 PLW12 0.27318001 W  
 PLW13 0.13741000 W

F2 - Processing parameters  
 SI 32768  
 SF 100.6580296 MHz  
 WDW EM  
 SSB 0  
 LB 1.00 Hz  
 GB 0  
 PC 1.40

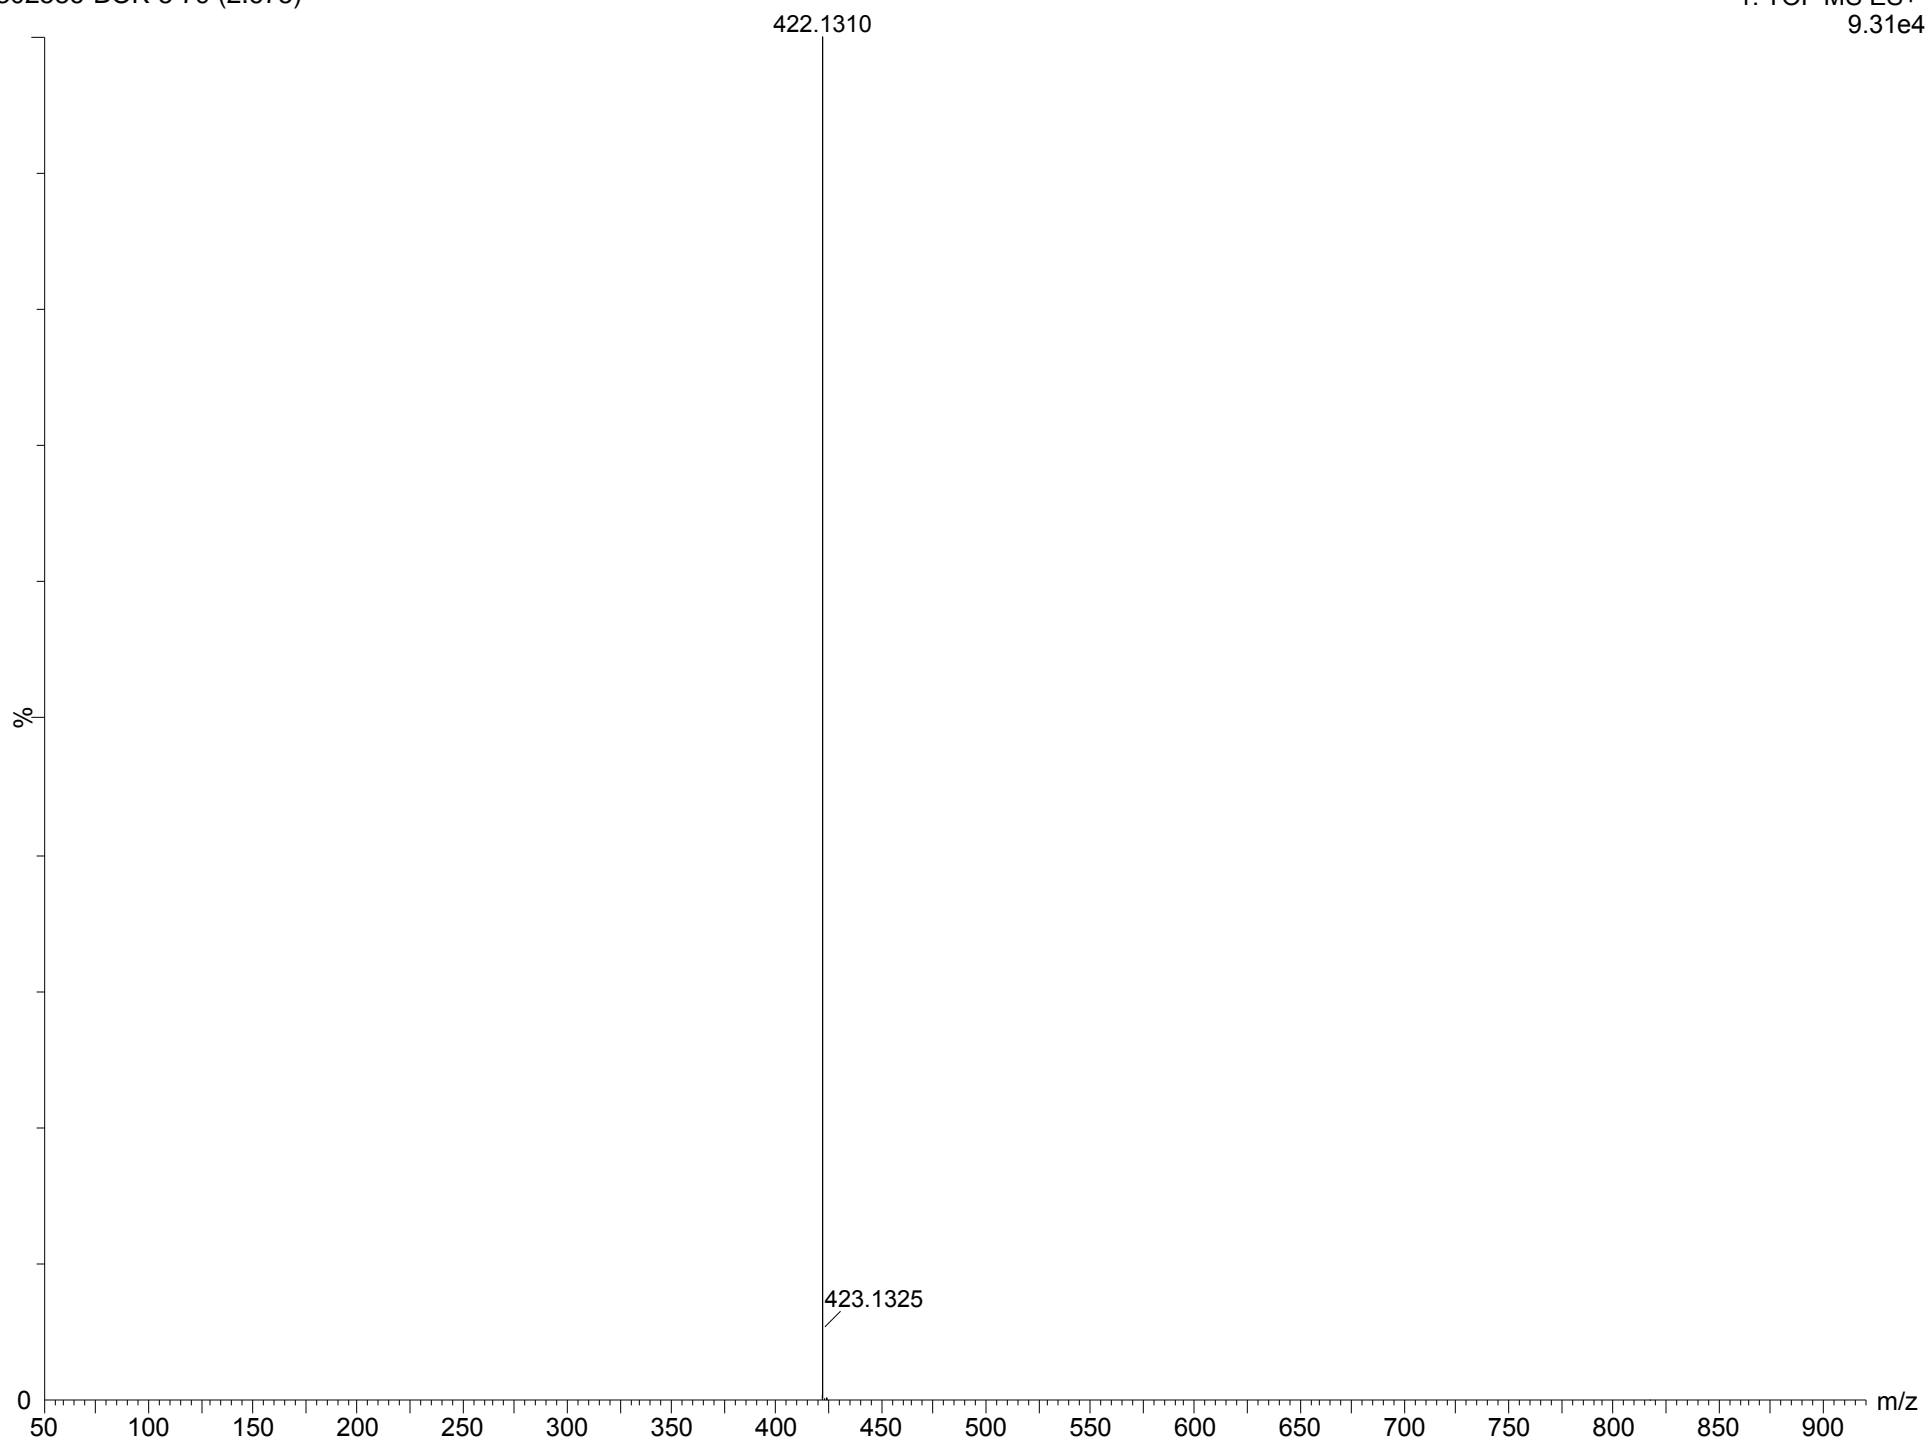

Mass spectrum of 4-(4-((benzo[d]oxazol-2-ylthio)methyl)-1H-1,2,3-triazol-1-yl)-3-oxo-N-(p-tolyl) butanamide3e (BOK-5).

# COMPOUND 3f (BOK-6) SPECTRAL DATA

BOK-6  
<sup>1</sup>H-NMR in DMSO



— 10.536  
 8.064  
 7.790  
 7.769  
 7.705  
 7.682  
 7.664  
 7.375  
 7.346  
 — 5.603  
 — 4.718  
 — 3.778  
 — 3.341  
 — 2.509  
 — 1.238

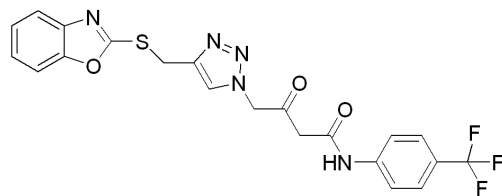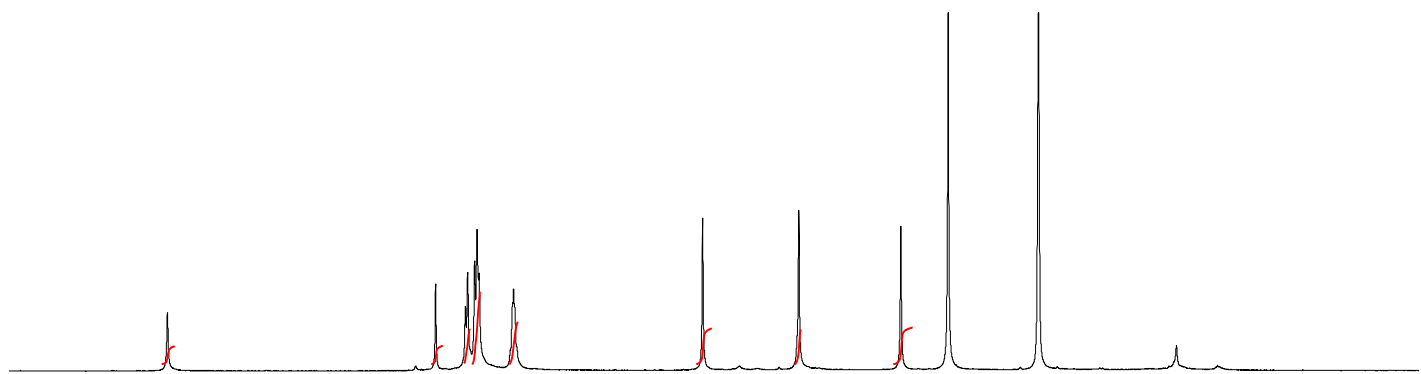

11 10 9 8 7 6 5 4 3 2 1 0 ppm

1.01  
 1.03  
 2.01  
 4.18  
 2.36  
 2.00  
 2.00  
 2.05

Current Data Parameters  
 NAME 23000350-BO-CF3  
 EXPNO 1  
 PROCNO 1

F2 - Acquisition Parameters  
 Date\_ 20230403  
 Time 16.06 h  
 INSTRUM spect  
 PROBHD Z108618\_0984 (  
 PULPROG zg30  
 TD 65536  
 SOLVENT DMSO  
 NS 16  
 DS 2  
 SWH 8012.820 Hz  
 FIDRES 0.244532 Hz  
 AQ 4.0894465 sec  
 RG 255.12  
 DW 62.400 usec  
 DE 17.09 usec  
 TE 297.3 K  
 D1 1.00000000 sec  
 TD0 1  
 SFO1 400.3124719 MHz  
 NUC1 1H  
 P0 4.67 usec  
 P1 14.00 usec  
 PLW1 11.28999996 W

F2 - Processing parameters  
 SI 65536  
 SF 400.3100000 MHz  
 WDW EM  
 SSB 0  
 LB 0.30 Hz  
 GB 0  
 PC 1.00



BOK-6  
<sup>13</sup>C-NMR in DMSO

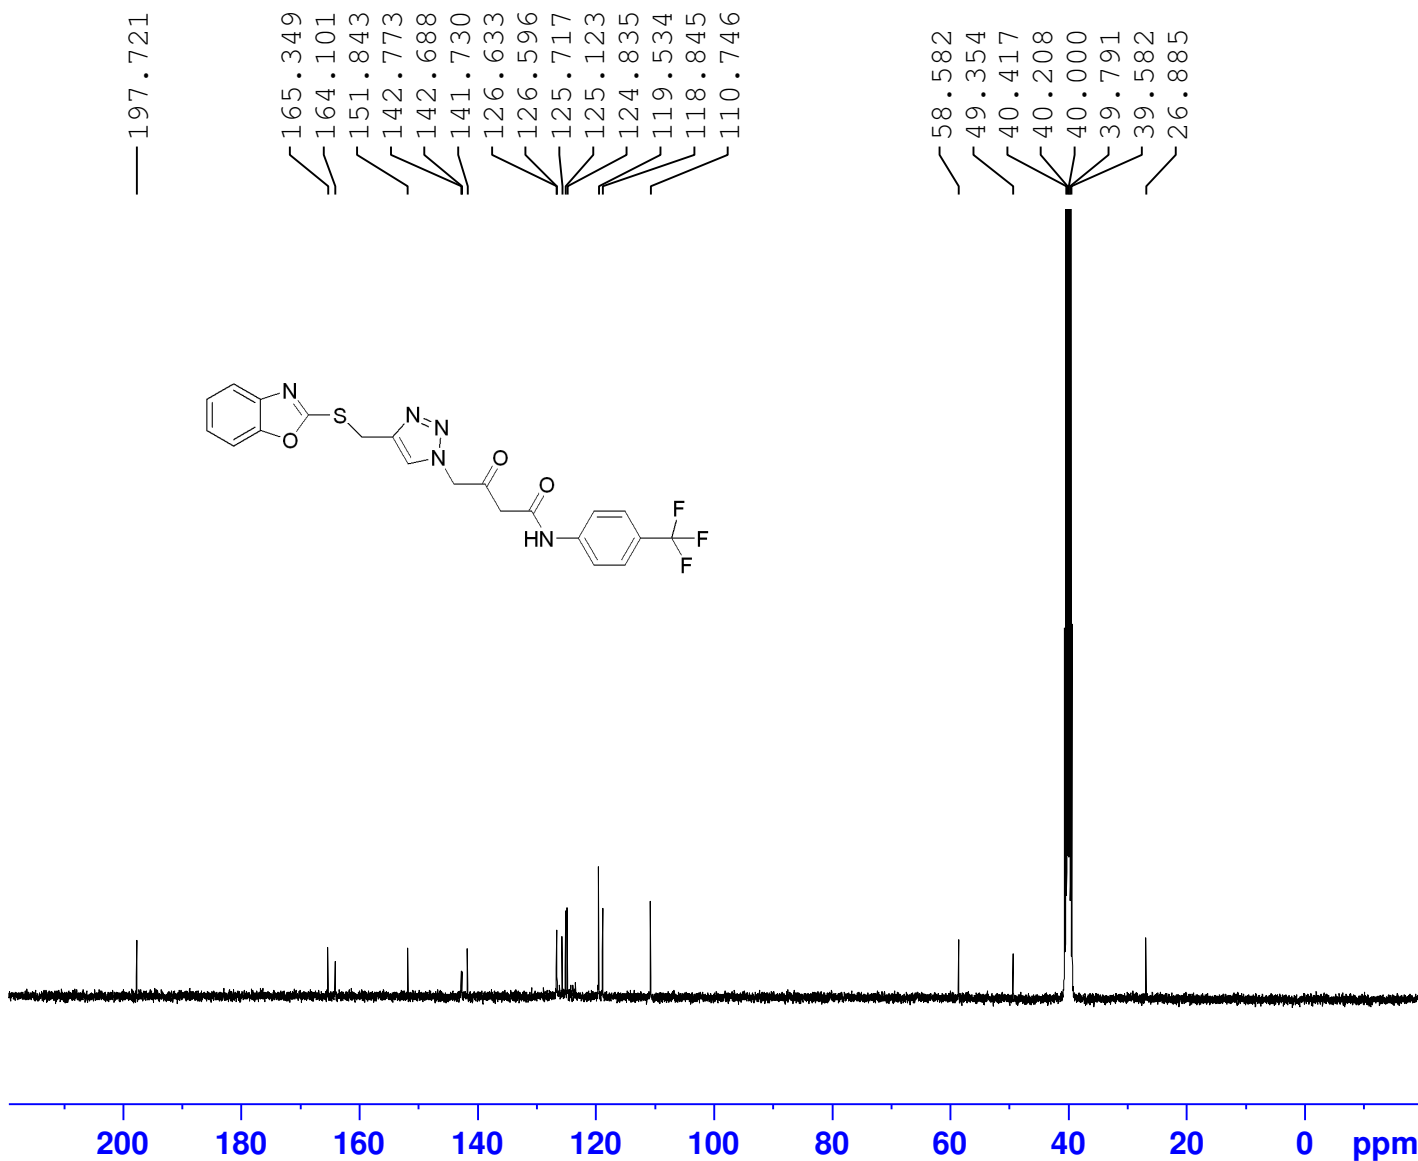

Current Data Parameters  
 NAME 23000439-BO-4CF3  
 EXPNO 2  
 PROCNO 1

F2 - Acquisition Parameters  
 Date\_ 20230430  
 Time 16.16 h  
 INSTRUM spect  
 PROBHD Z108618\_0984 (  
 PULPROG zgpg30  
 TD 65536  
 SOLVENT DMSO  
 NS 1024  
 DS 4  
 SWH 24038.461 Hz  
 FIDRES 0.733596 Hz  
 AQ 1.3631488 sec  
 RG 202.84  
 DW 20.800 usec  
 DE 6.50 usec  
 TE 298.5 K  
 D1 1.00000000 sec  
 D11 0.03000000 sec  
 TD0 1  
 SFO1 100.6680954 MHz  
 NUC1 13C  
 P0 3.33 usec  
 P1 10.00 usec  
 PLW1 51.02600098 W  
 SFO2 400.3116012 MHz  
 NUC2 1H  
 CPDPRG[2] waltz65  
 PCPD2 90.00 usec  
 PLW2 11.28999996 W  
 PLW12 0.27318001 W  
 PLW13 0.13741000 W

F2 - Processing parameters  
 SI 32768  
 SF 100.6580296 MHz  
 WDW EM  
 SSB 0  
 LB 1.00 Hz  
 GB 0  
 PC 1.40

<sup>13</sup>C NMR spectrum of 4-(4-((benzo[d]oxazol-2-ylthio)methyl)-1H-1,2,3-triazol-1-yl)-3-oxo-N-(4-(trifluoromethyl)phenyl)butanamide **3f** (BOK-6).

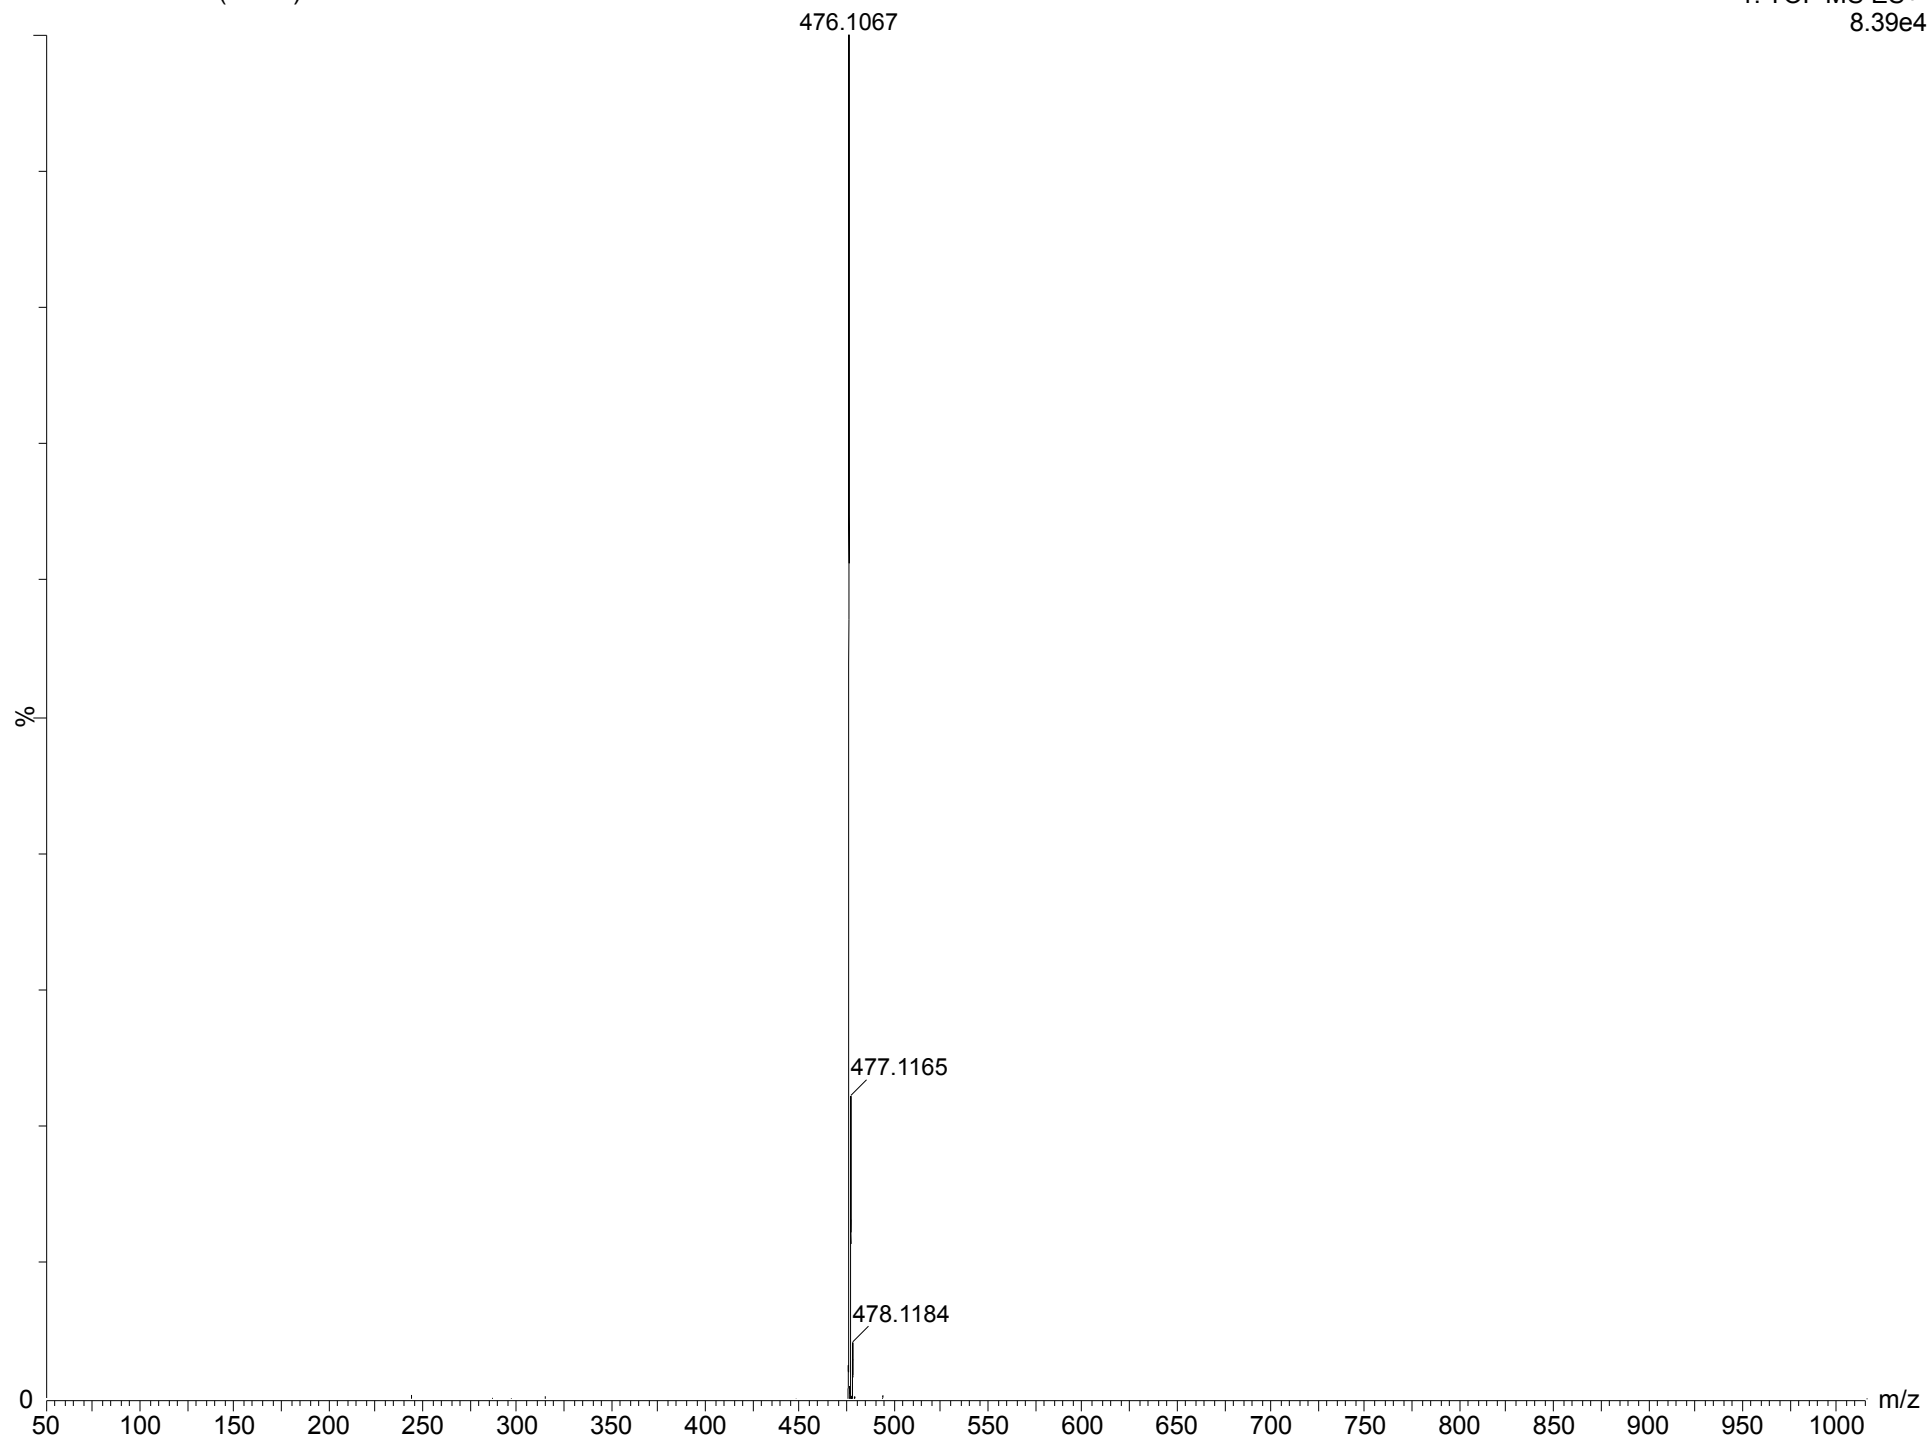Mass spectrum of 4-(4-((benzo[d]oxazol-2-ylthio)methyl)-1H-1,2,3-triazol-1-yl)-3-oxo-N-(4-(trifluoromethyl) phenyl)butanamide **3f (BOK-6)**.

# COMPOUND 3g (BOK-7) SPECTRAL DATA

BOK-7  
<sup>1</sup>H-NMR in DMSO

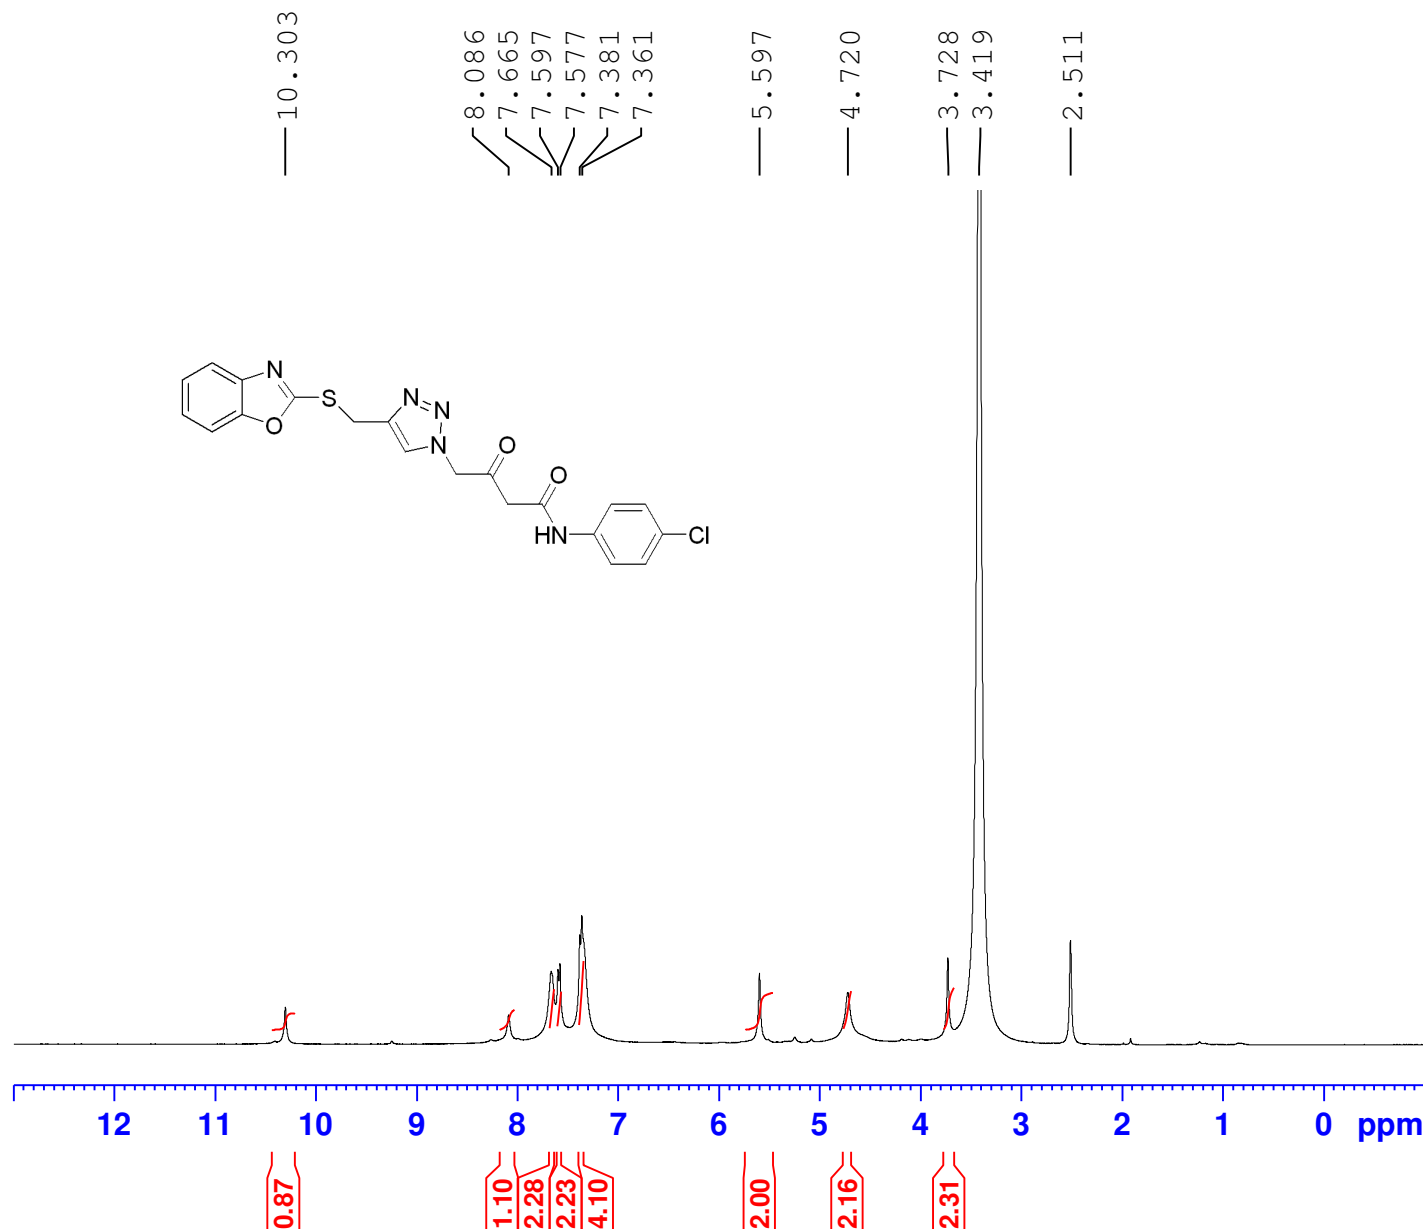

Current Data Parameters  
 NAME 23000783-BO-4CL  
 EXPNO 1  
 PROCNO 1

F2 - Acquisition Parameters  
 Date\_ 20230801  
 Time 6.44 h  
 INSTRUM spect  
 PROBHD Z108618\_0984 (  
 PULPROG zg30  
 TD 65536  
 SOLVENT DMSO  
 NS 16  
 DS 2  
 SWH 8012.820 Hz  
 FIDRES 0.244532 Hz  
 AQ 4.0894465 sec  
 RG 114.18  
 DW 62.400 usec  
 DE 17.09 usec  
 TE 297.2 K  
 D1 1.00000000 sec  
 TD0 1  
 SFO1 400.3124719 MHz  
 NUC1 1H  
 P0 4.67 usec  
 P1 14.00 usec  
 PLW1 11.28999996 W

F2 - Processing parameters  
 SI 65536  
 SF 400.3100000 MHz  
 WDW EM  
 SSB 0  
 LB 0.30 Hz  
 GB 0  
 PC 1.00

<sup>1</sup>H NMR spectrum of 4-(4-((benzo[d]oxazol-2-ylthio)methyl)-1H-1,2,3-triazol-1-yl)-N-(4-chlorophenyl)-3-oxo butanamide **3g (BOK-7)**.

BOK-7  
<sup>13</sup>C-NMR in DMSO

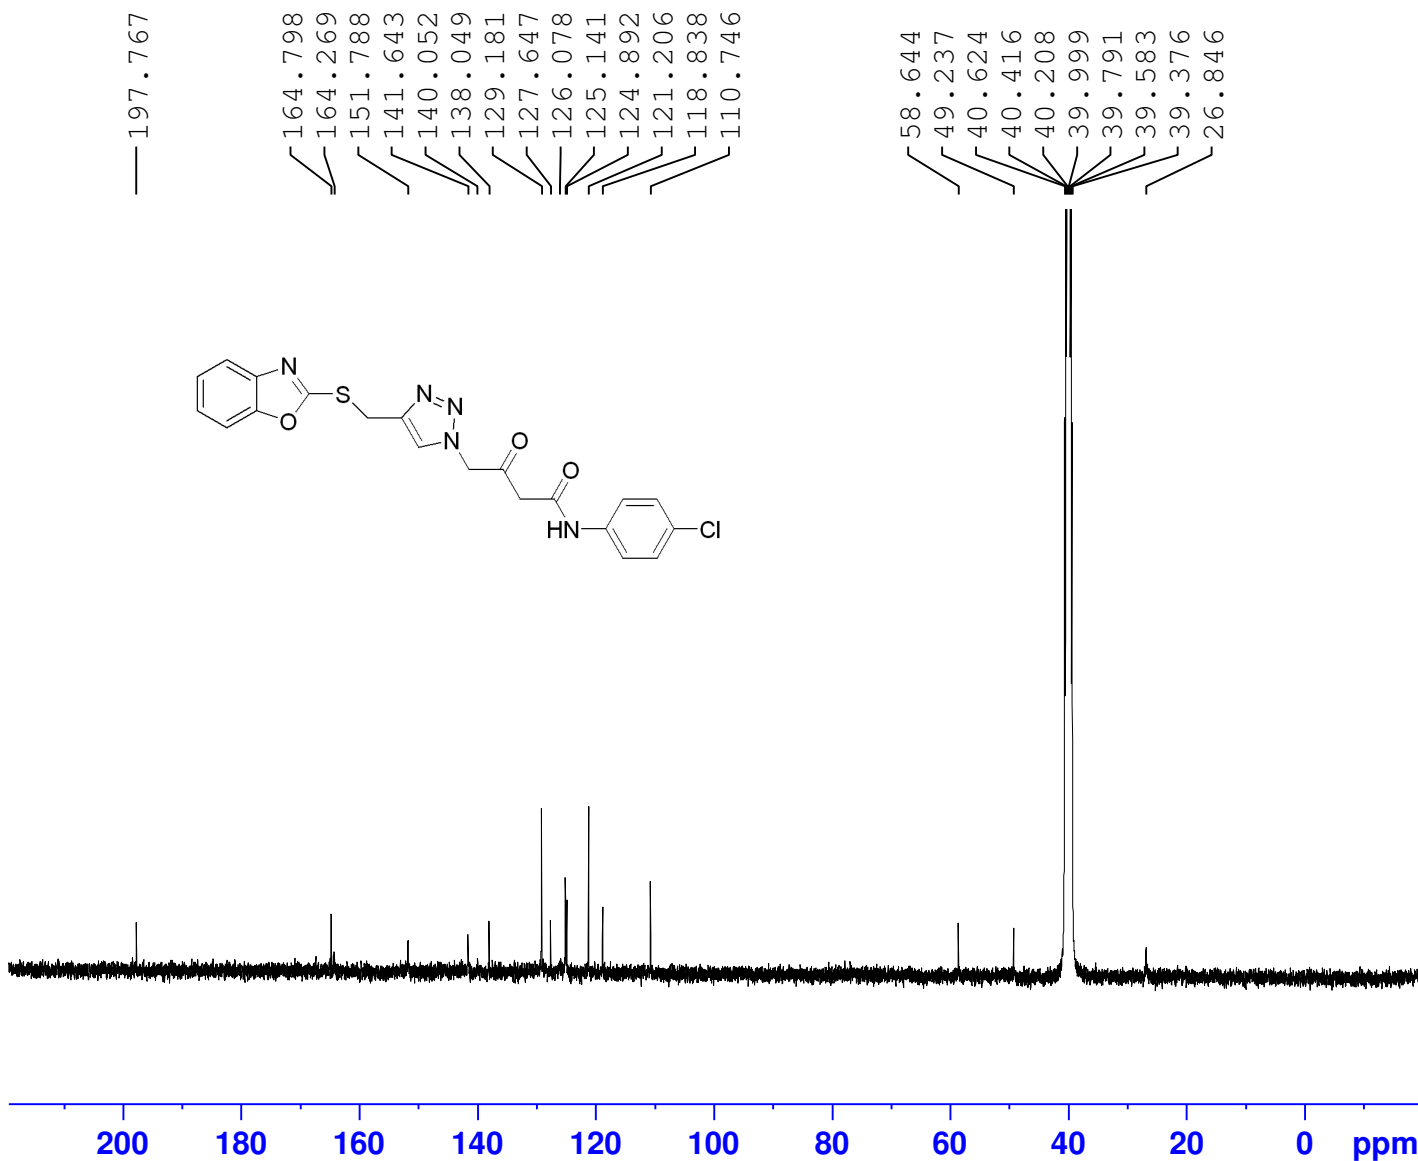

Current Data Parameters  
 NAME 23000783-BO-4CL  
 EXPNO 2  
 PROCNO 1

F2 - Acquisition Parameters  
 Date\_ 20230801  
 Time 7.26 h  
 INSTRUM spect  
 PROBHD Z108618\_0984 (  
 PULPROG zgpg30  
 TD 65536  
 SOLVENT DMSO  
 NS 1024  
 DS 4  
 SWH 24038.461 Hz  
 FIDRES 0.733596 Hz  
 AQ 1.3631488 sec  
 RG 2050  
 DW 20.800 usec  
 DE 6.50 usec  
 TE 298.2 K  
 D1 1.00000000 sec  
 D11 0.03000000 sec  
 TD0 1  
 SFO1 100.6680954 MHz  
 NUC1 13C  
 P0 3.33 usec  
 P1 10.00 usec  
 PLW1 51.02600098 W  
 SFO2 400.3116012 MHz  
 NUC2 1H  
 CPDPRG[2] waltz65  
 PCPD2 90.00 usec  
 PLW2 11.28999996 W  
 PLW12 0.27318001 W  
 PLW13 0.13741000 W

F2 - Processing parameters  
 SI 32768  
 SF 100.6580296 MHz  
 WDW EM  
 SSB 0  
 LB 1.00 Hz  
 GB 0  
 PC 1.40

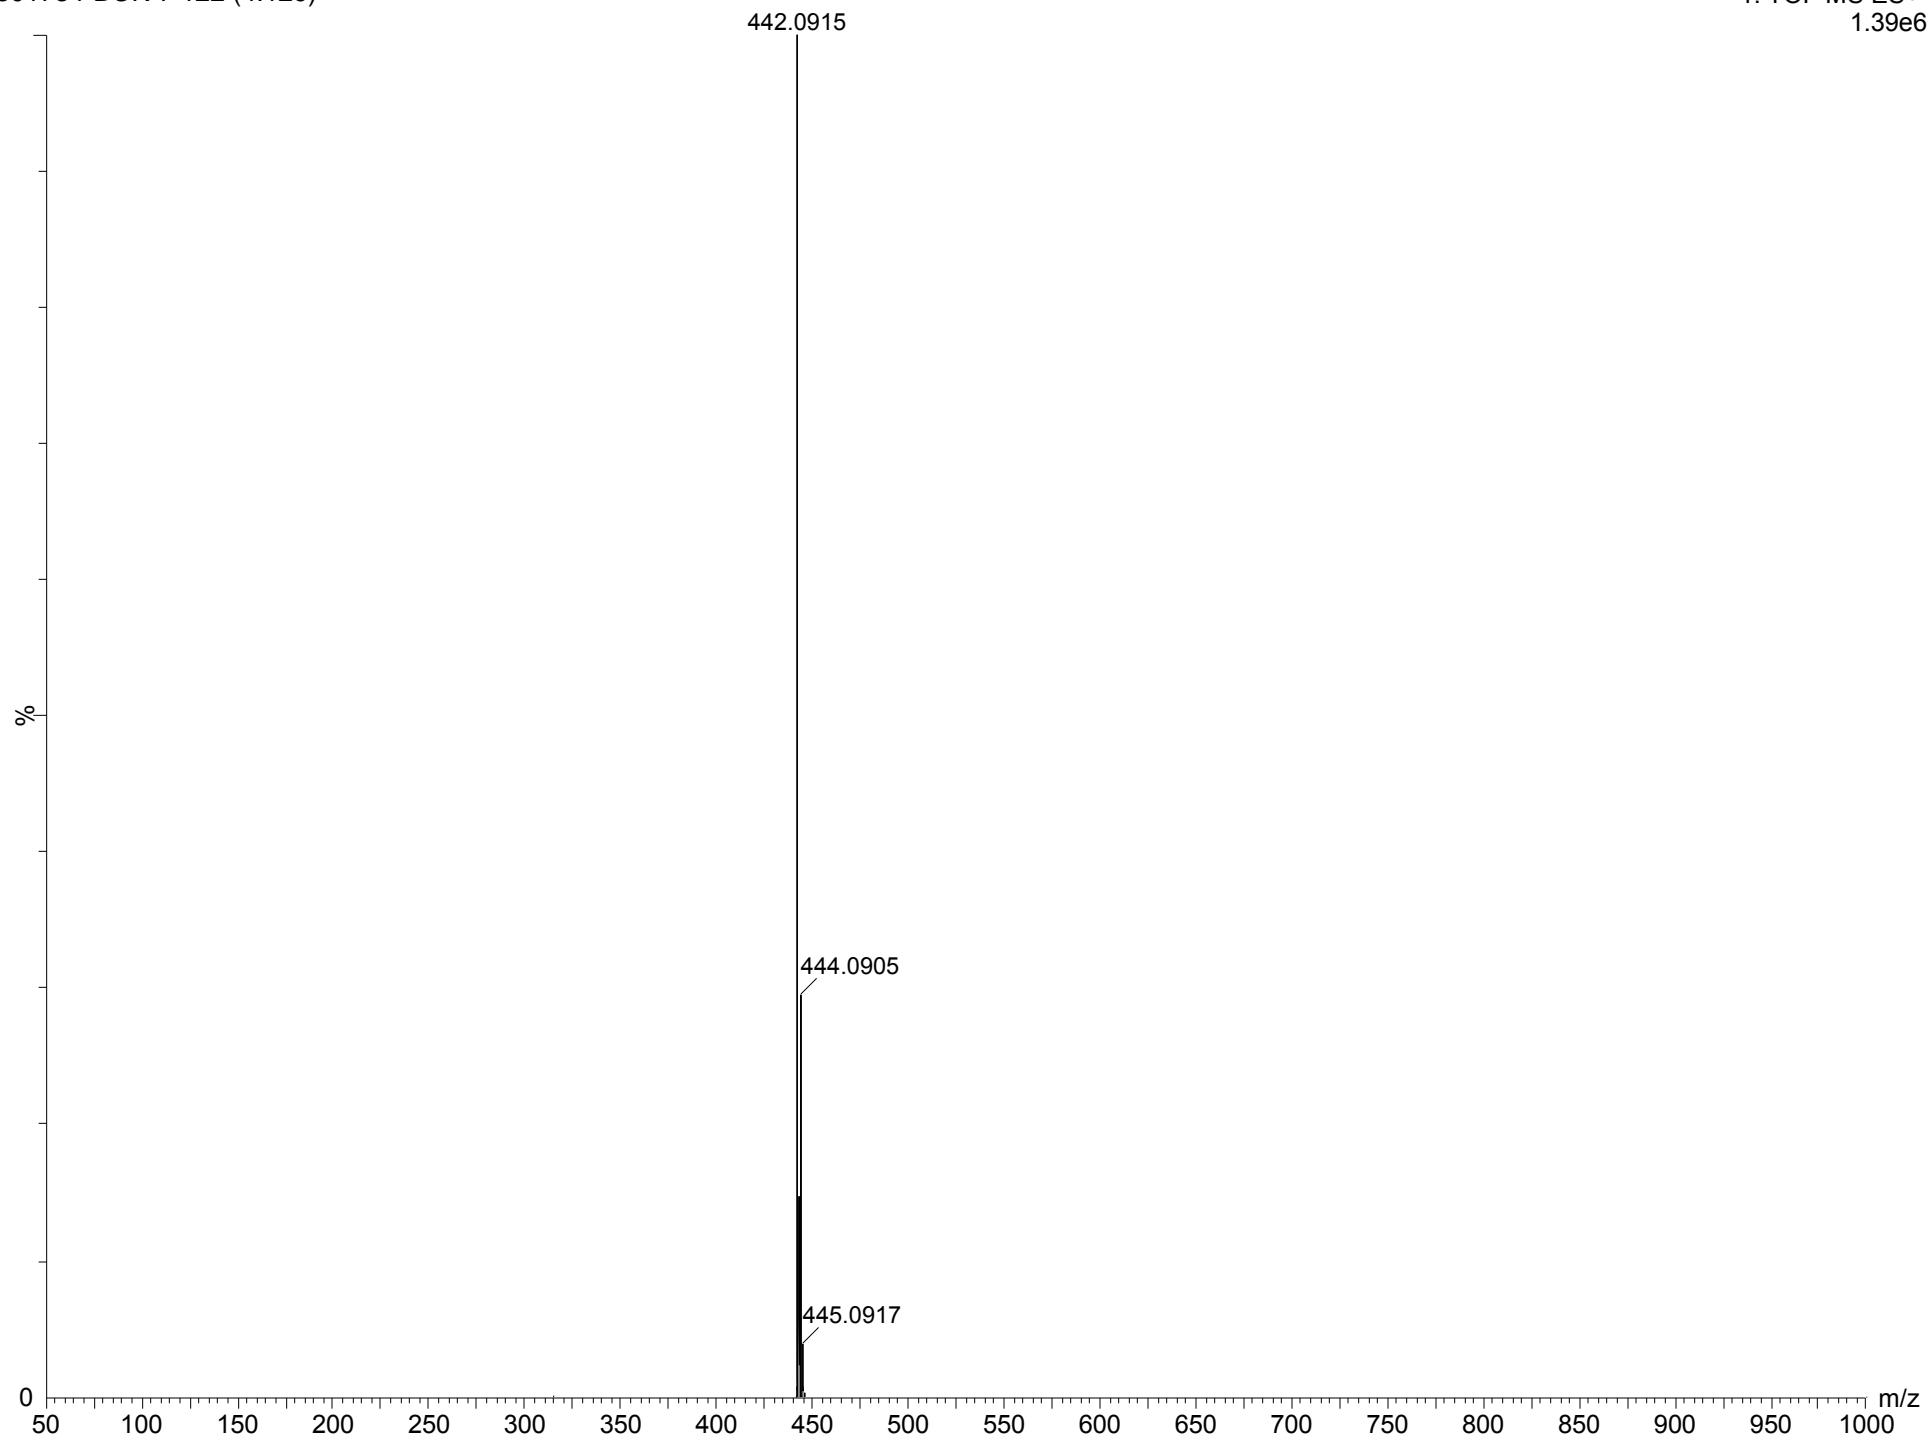Mass spectrum of 4-(4-((benzo[d]oxazol-2-ylthio)methyl)-1H-1,2,3-triazol-1-yl)-N-(4-chlorophenyl)-3-oxo butanamide **3g (BOK-7)**.

# COMPOUND 3h (BOK-8) SPECTRAL DATA

BOK-8  
<sup>1</sup>H-NMR in DMSO

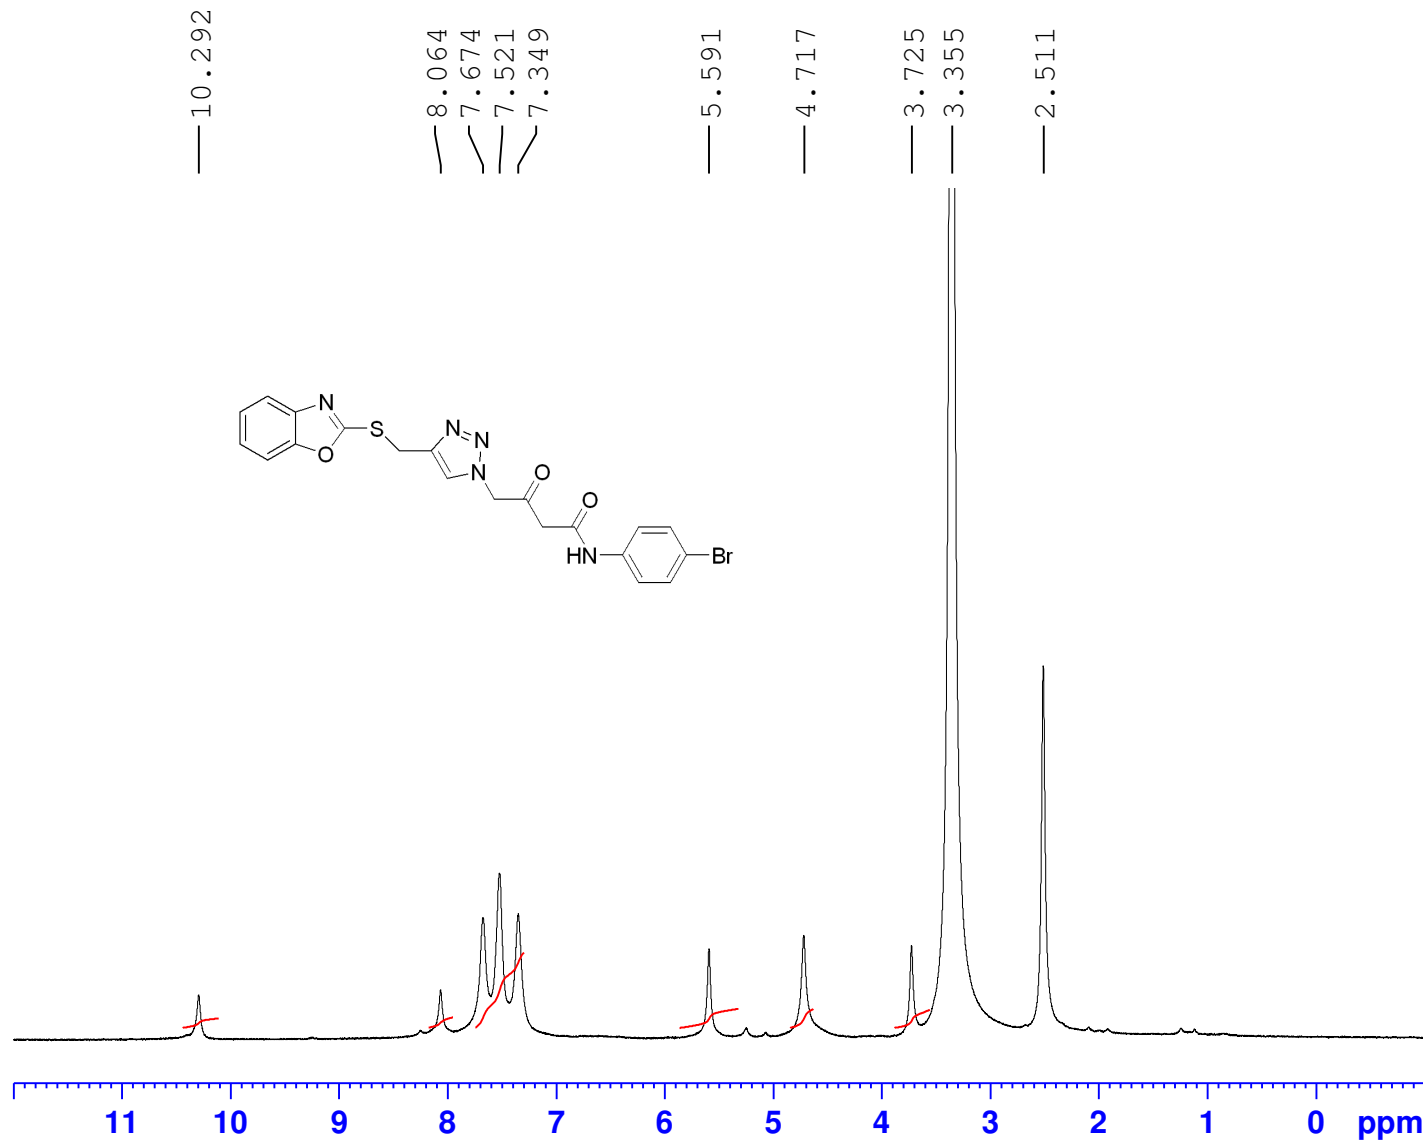

Current Data Parameters  
 NAME 23000509-BO-4Br  
 EXPNO 1  
 PROCNO 1

F2 - Acquisition Parameters  
 Date\_ 20230520  
 Time 10.36 h  
 INSTRUM spect  
 PROBHD Z108618\_0984 (  
 PULPROG zg30  
 TD 65536  
 SOLVENT DMSO  
 NS 32  
 DS 2  
 SWH 8012.820 Hz  
 FIDRES 0.244532 Hz  
 AQ 4.0894465 sec  
 RG 32.13  
 DW 62.400 usec  
 DE 17.09 usec  
 TE 297.8 K  
 D1 1.00000000 sec  
 TD0 1  
 SFO1 400.3124719 MHz  
 NUC1 1H  
 P0 4.67 usec  
 P1 14.00 usec  
 PLW1 11.28999996 W

F2 - Processing parameters  
 SI 65536  
 SF 400.3100000 MHz  
 WDW EM  
 SSB 0  
 LB 0.30 Hz  
 GB 0  
 PC 1.00

<sup>1</sup>H NMR spectrum of 4-(4-((benzo[d]oxazol-2-ylthio)methyl)-1H-1,2,3-triazol-1-yl)-N-(4-bromophenyl)-3-oxo butanamide **3h (BOK-8)**.

BOK-8  
<sup>13</sup>C-NMR in DMSO

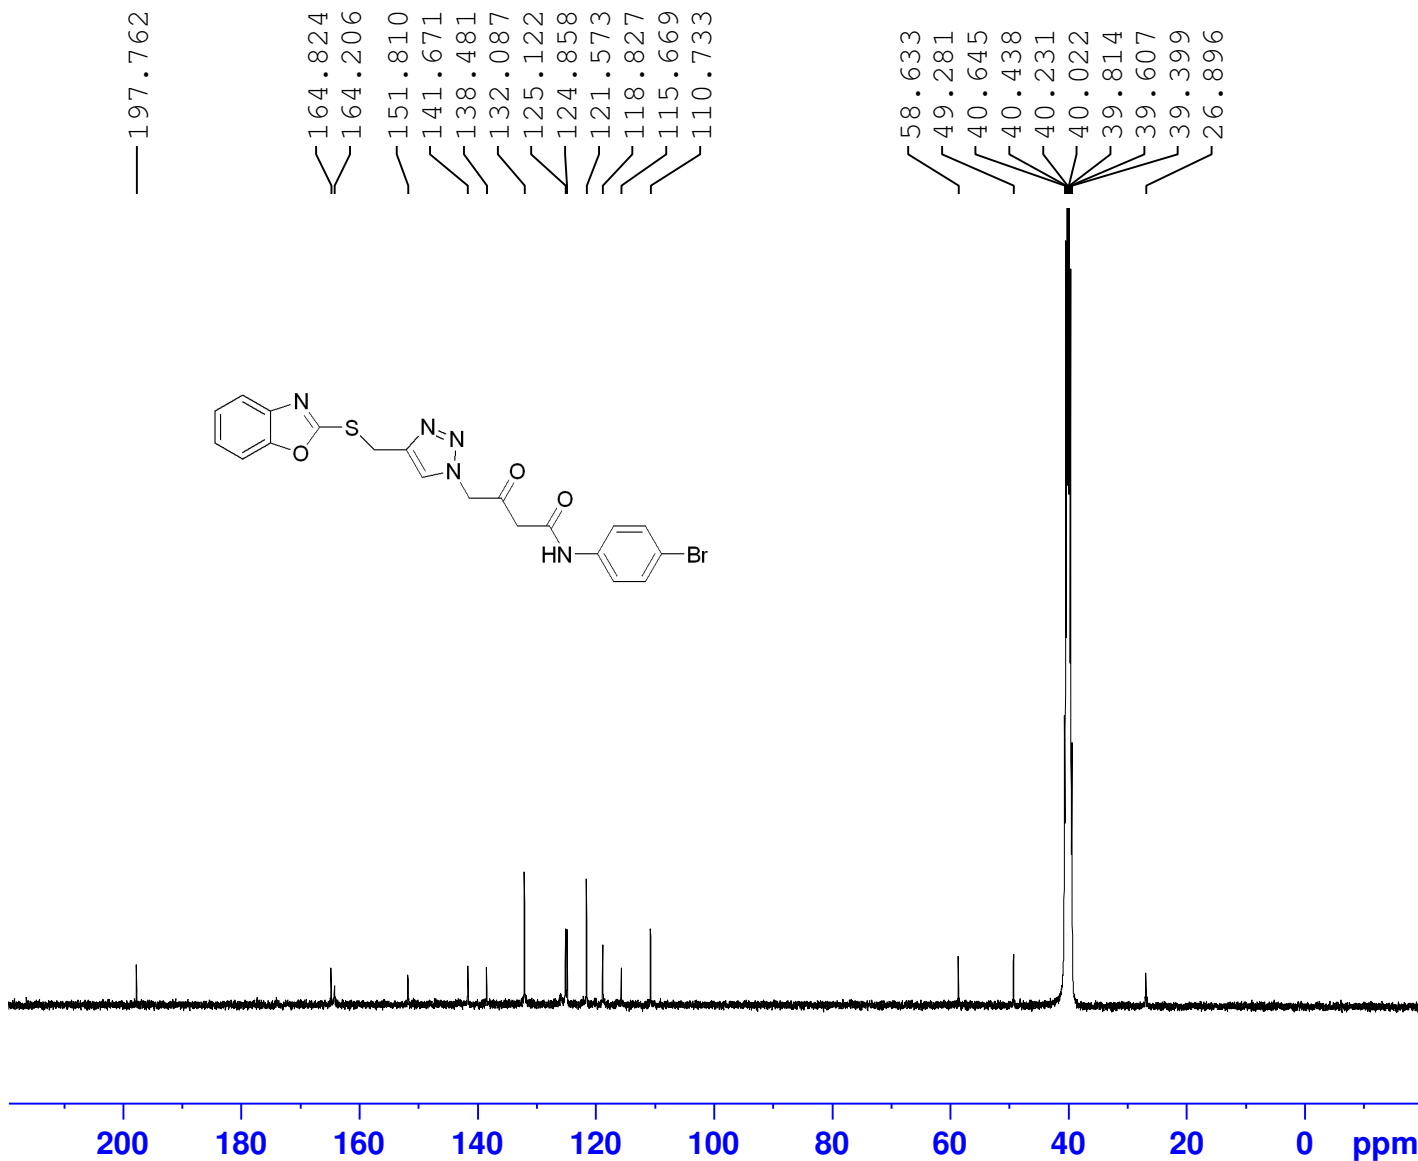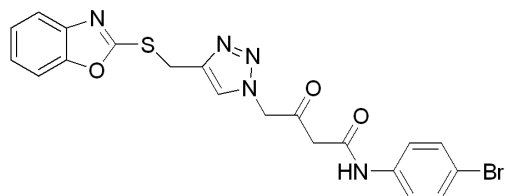

Current Data Parameters  
 NAME 23000509-BO-4Br  
 EXPNO 2  
 PROCNO 1

F2 - Acquisition Parameters  
 Date\_ 20230522  
 Time 14.40 h  
 INSTRUM spect  
 PROBHD Z108618\_0984 (  
 PULPROG zgpg30  
 TD 65536  
 SOLVENT DMSO  
 NS 1024  
 DS 4  
 SWH 26041.666 Hz  
 FIDRES 0.794729 Hz  
 AQ 1.2582912 sec  
 RG 202.84  
 DW 19.200 usec  
 DE 6.50 usec  
 TE 298.8 K  
 D1 1.00000000 sec  
 D11 0.03000000 sec  
 TD0 1  
 SFO1 100.6680954 MHz  
 NUC1 13C  
 P0 3.33 usec  
 P1 10.00 usec  
 PLW1 51.02600098 W  
 SFO2 400.3116012 MHz  
 NUC2 1H  
 CPDPRG[2] waltz65  
 PCPD2 90.00 usec  
 PLW2 11.28999996 W  
 PLW12 0.27318001 W  
 PLW13 0.13741000 W

F2 - Processing parameters  
 SI 32768  
 SF 100.6580296 MHz  
 WDW EM  
 SSB 0  
 LB 1.00 Hz  
 GB 0  
 PC 1.40

<sup>13</sup>C NMR spectrum of 4-(4-((benzo[d]oxazol-2-ylthio)methyl)-1H-1,2,3-triazol-1-yl)-N-(4-bromophenyl)-3-oxobutanamide **3h** (BOK-8).

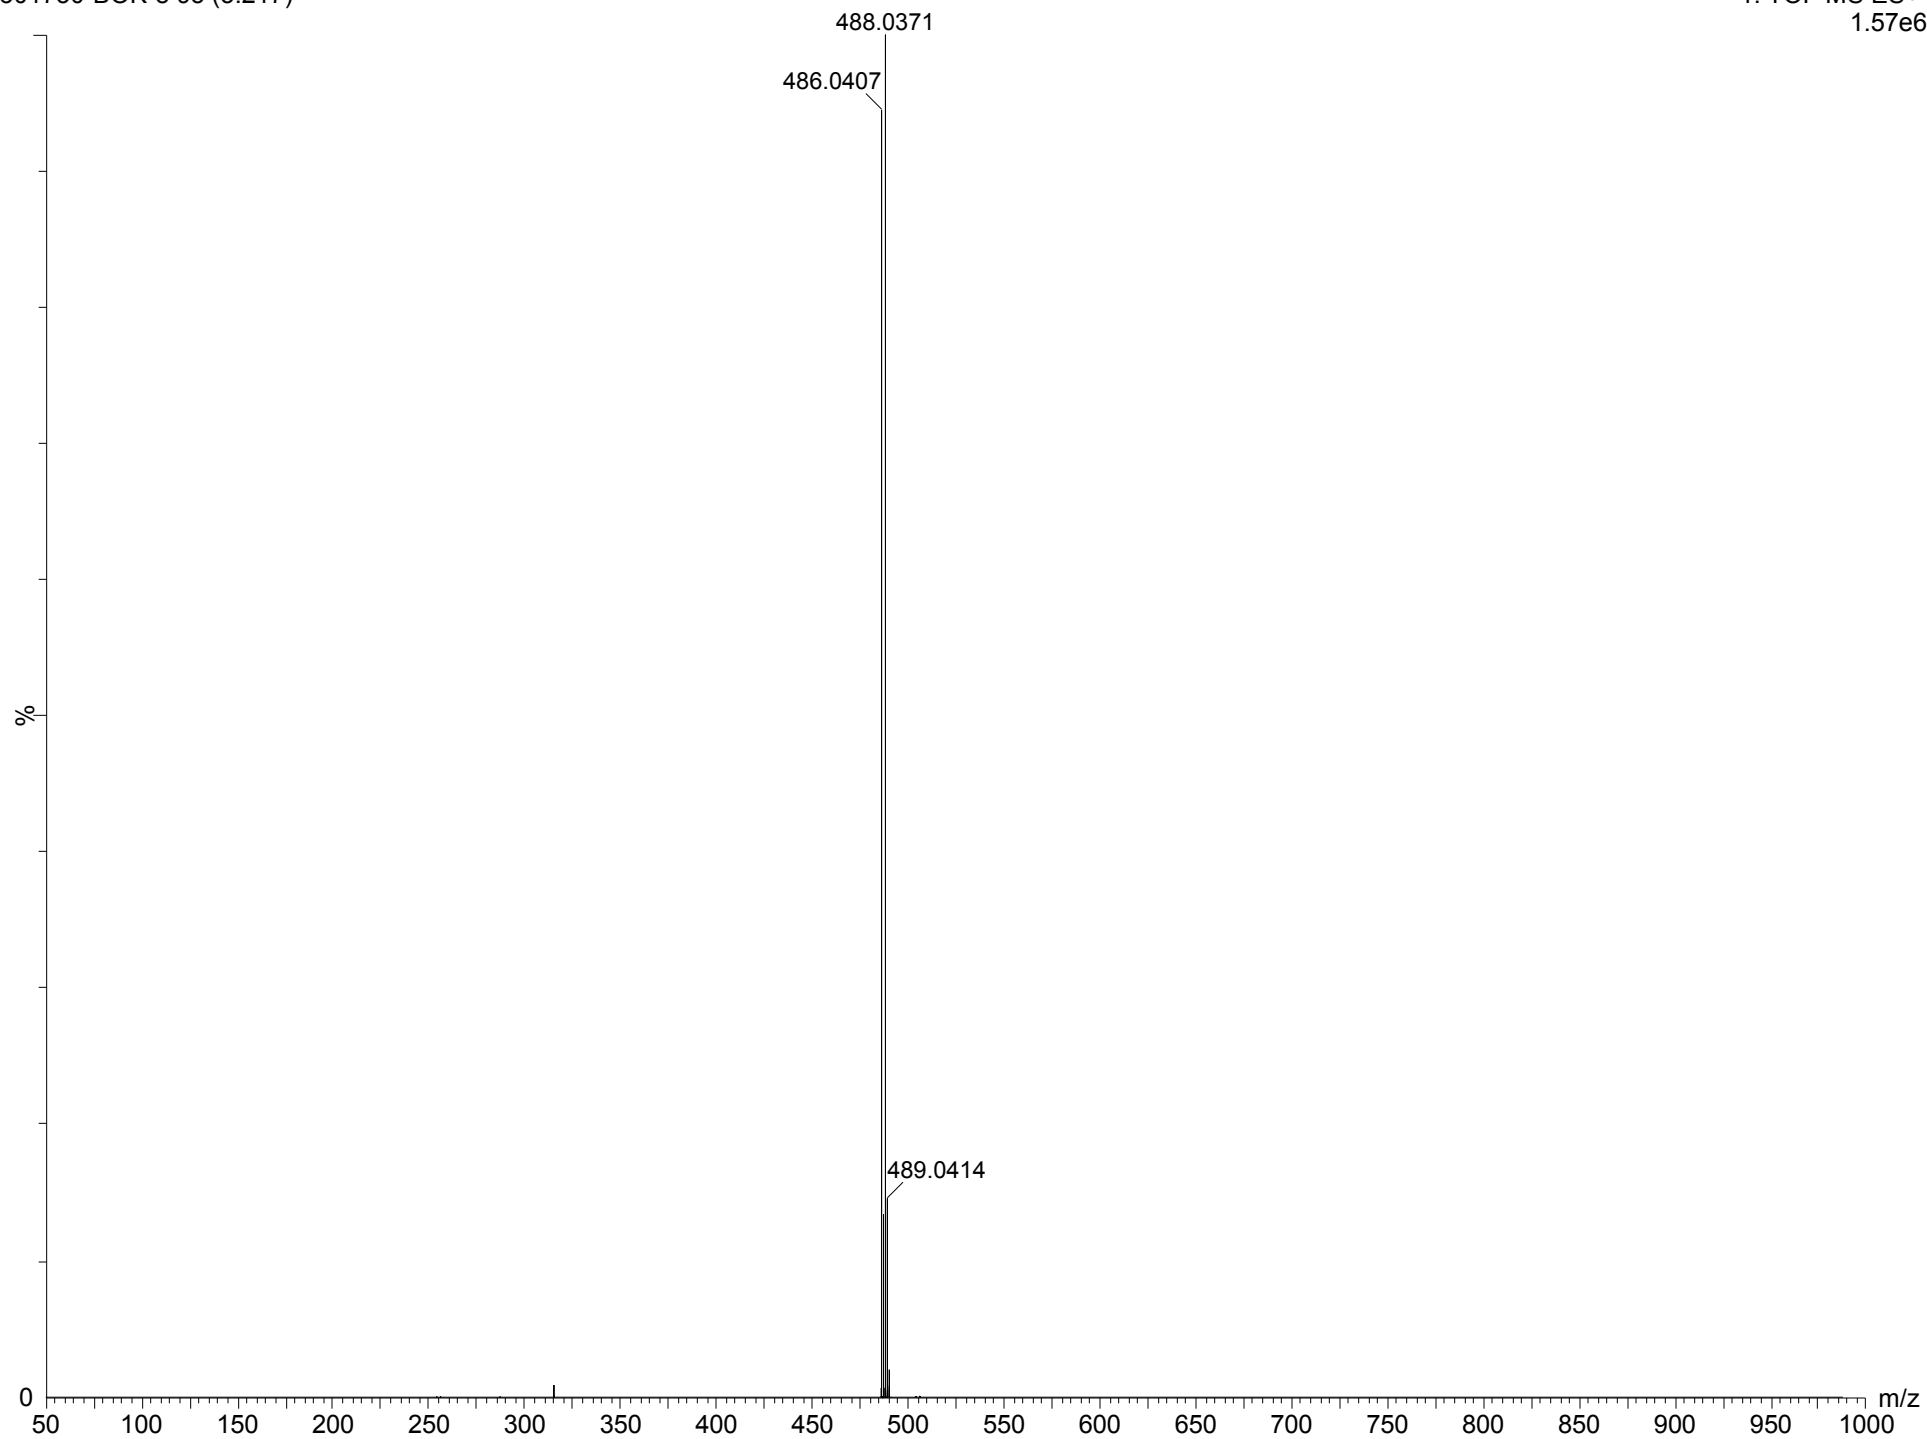



COMPOUND 3i (BOK-9) SPECTRAL DATA

BOK-9  
<sup>1</sup>H-NMR in DMSO

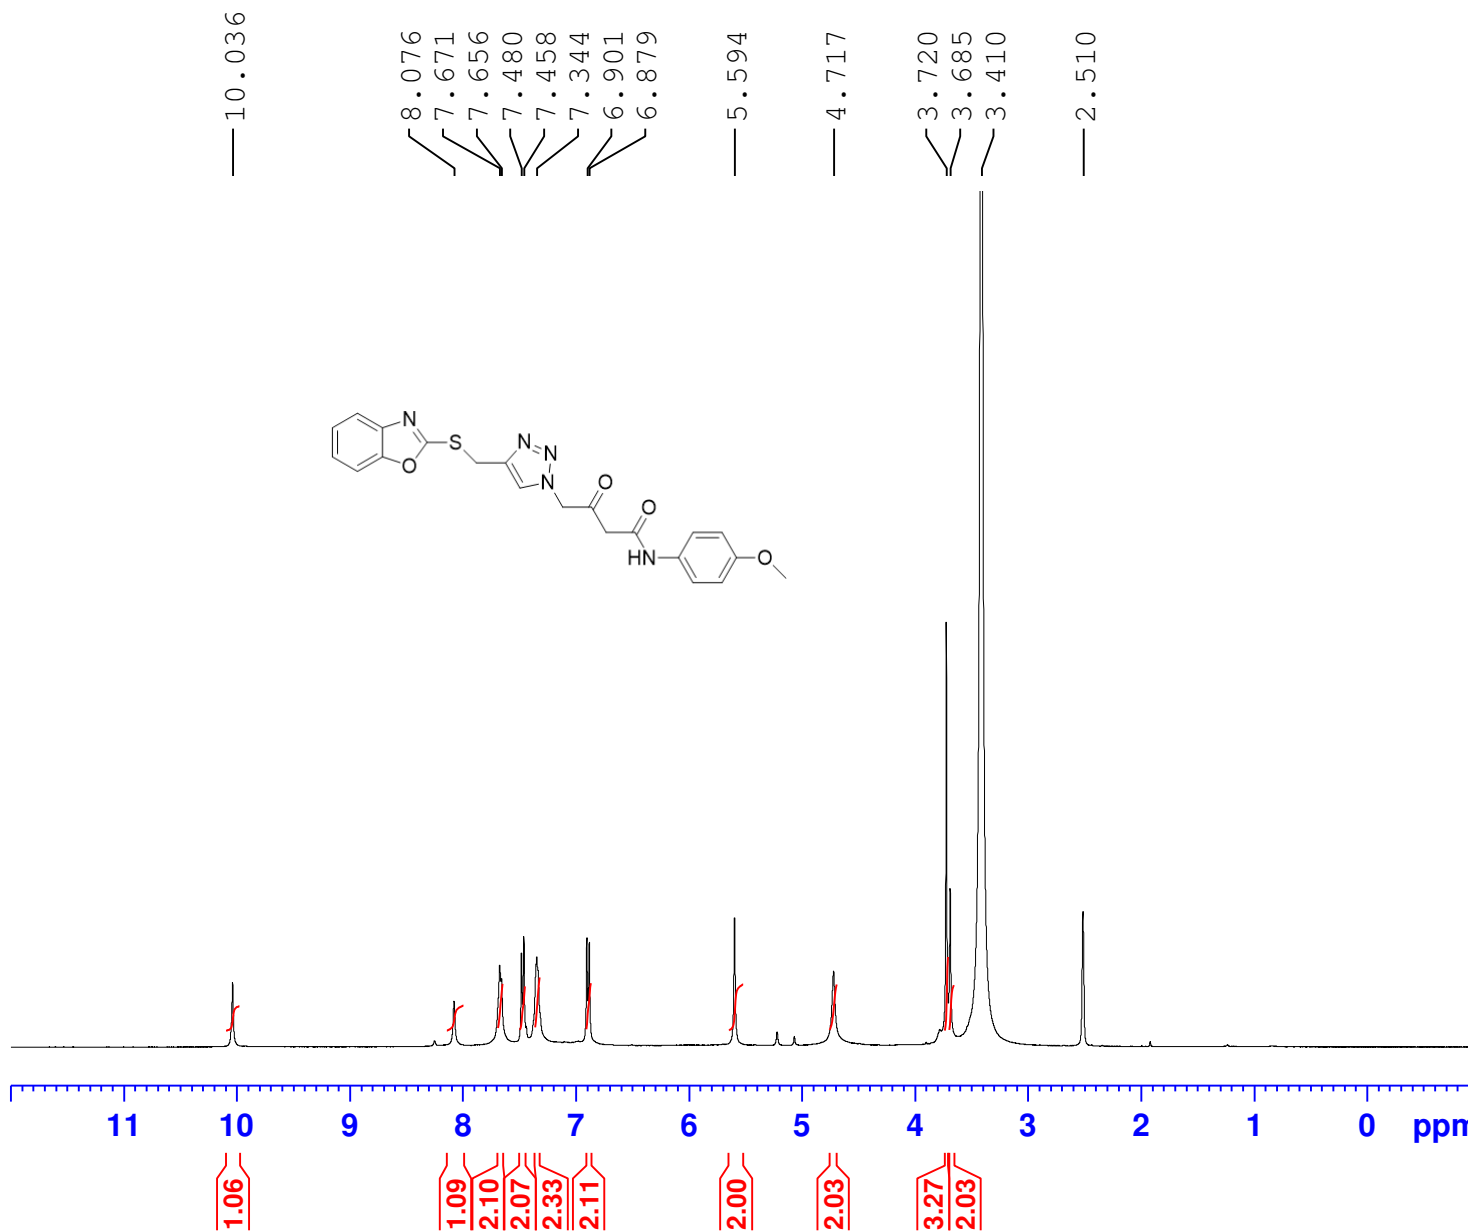

Current Data Parameters  
 NAME 23000782-BO-4OCH3  
 EXPNO 1  
 PROCNO 1

F2 - Acquisition Parameters  
 Date\_ 20230801  
 Time 5.57 h  
 INSTRUM spect  
 PROBHD Z108618\_0984 (  
 PULPROG zg30  
 TD 65536  
 SOLVENT DMSO  
 NS 16  
 DS 2  
 SWH 8012.820 Hz  
 FIDRES 0.244532 Hz  
 AQ 4.0894465 sec  
 RG 114.18  
 DW 62.400 usec  
 DE 17.09 usec  
 TE 296.9 K  
 D1 1.00000000 sec  
 TD0 1  
 SF01 400.3124719 MHz  
 NUC1 1H  
 P0 4.67 usec  
 P1 14.00 usec  
 PLW1 11.28999996 W

F2 - Processing parameters  
 SI 65536  
 SF 400.3100000 MHz  
 WDW EM  
 SSB 0  
 LB 0.30 Hz  
 GB 0  
 PC 1.00

<sup>1</sup>H NMR spectrum of 4-(4-((benzo[d]oxazol-2-ylthio)methyl)-1H-1,2,3-triazol-1-yl)-N-(4-methoxyphenyl)-3-oxo butanamide **3i (BOK-9)**.

BOK-9  
<sup>13</sup>C-NMR in DMSO

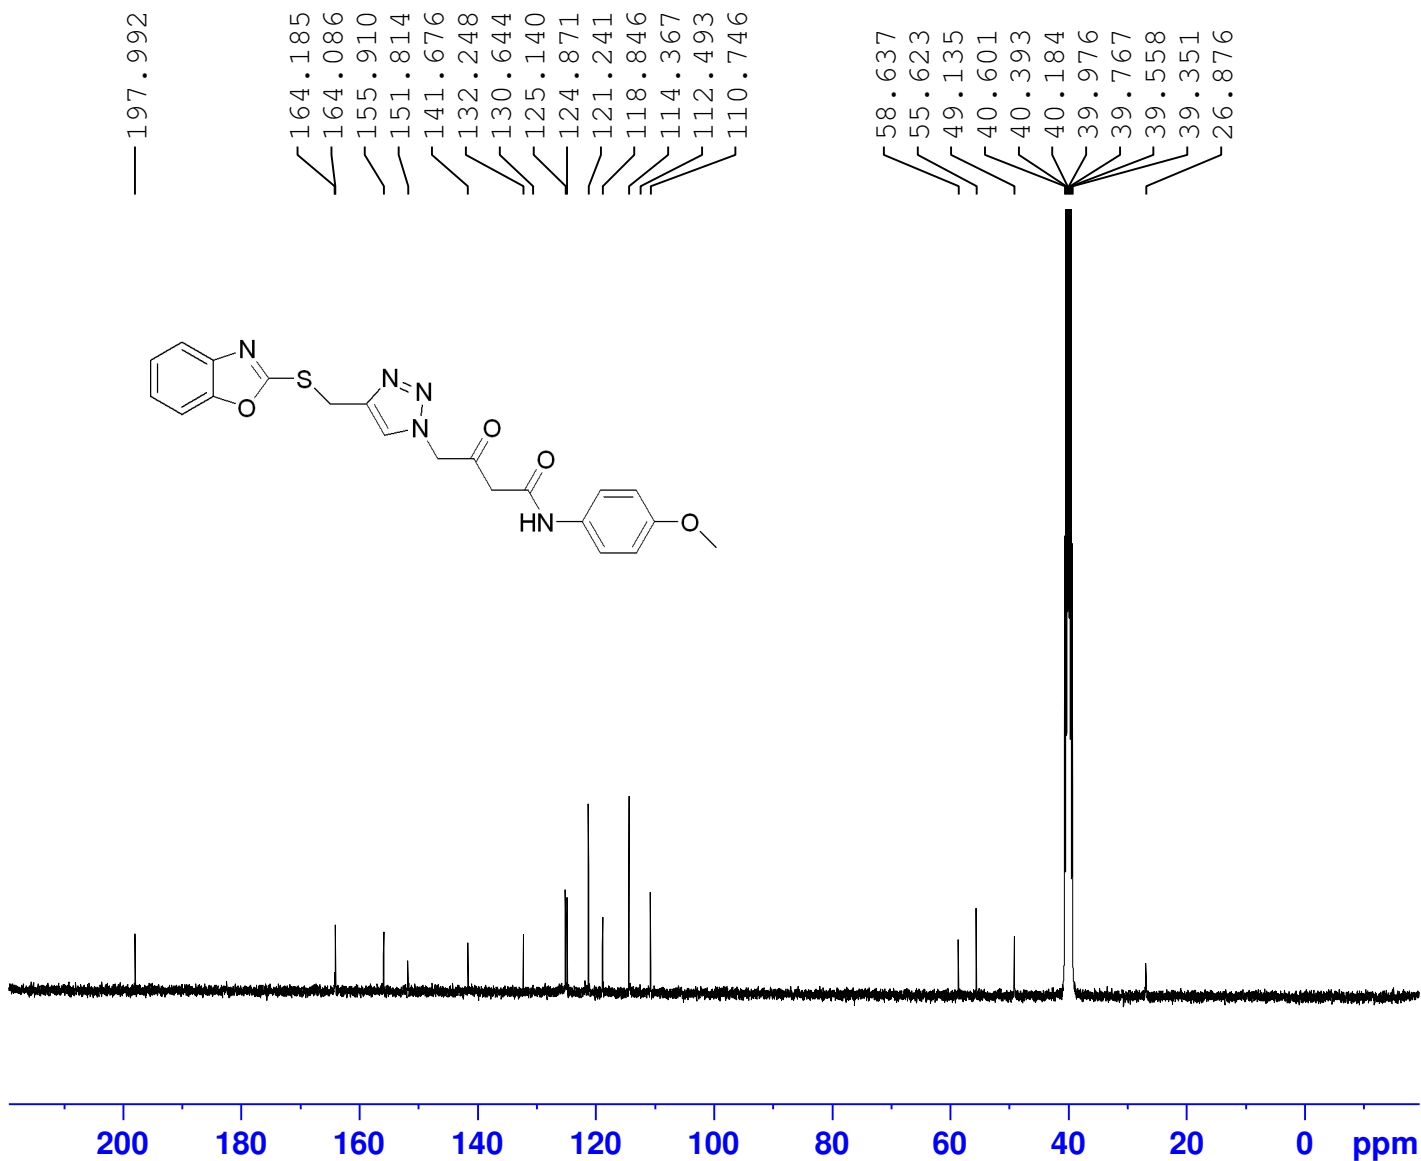

Current Data Parameters  
 NAME 23000782-BO-4OCH3  
 EXPNO 2  
 PROCNO 1

F2 - Acquisition Parameters  
 Date\_ 20230801  
 Time 6.40 h  
 INSTRUM spect  
 PROBHD Z108618\_0984 (  
 PULPROG zgpg30  
 TD 65536  
 SOLVENT DMSO  
 NS 1024  
 DS 4  
 SWH 24038.461 Hz  
 FIDRES 0.733596 Hz  
 AQ 1.3631488 sec  
 RG 2050  
 DW 20.800 usec  
 DE 6.50 usec  
 TE 297.9 K  
 D1 1.00000000 sec  
 D11 0.03000000 sec  
 TD0 1  
 SFO1 100.6680954 MHz  
 NUC1 13C  
 P0 3.33 usec  
 P1 10.00 usec  
 PLW1 51.02600098 W  
 SFO2 400.3116012 MHz  
 NUC2 1H  
 CPDPRG[2] waltz65  
 PCPD2 90.00 usec  
 PLW2 11.28999996 W  
 PLW12 0.27318001 W  
 PLW13 0.13741000 W

F2 - Processing parameters  
 SI 32768  
 SF 100.6580296 MHz  
 WDW EM  
 SSB 0  
 LB 1.00 Hz  
 GB 0  
 PC 1.40

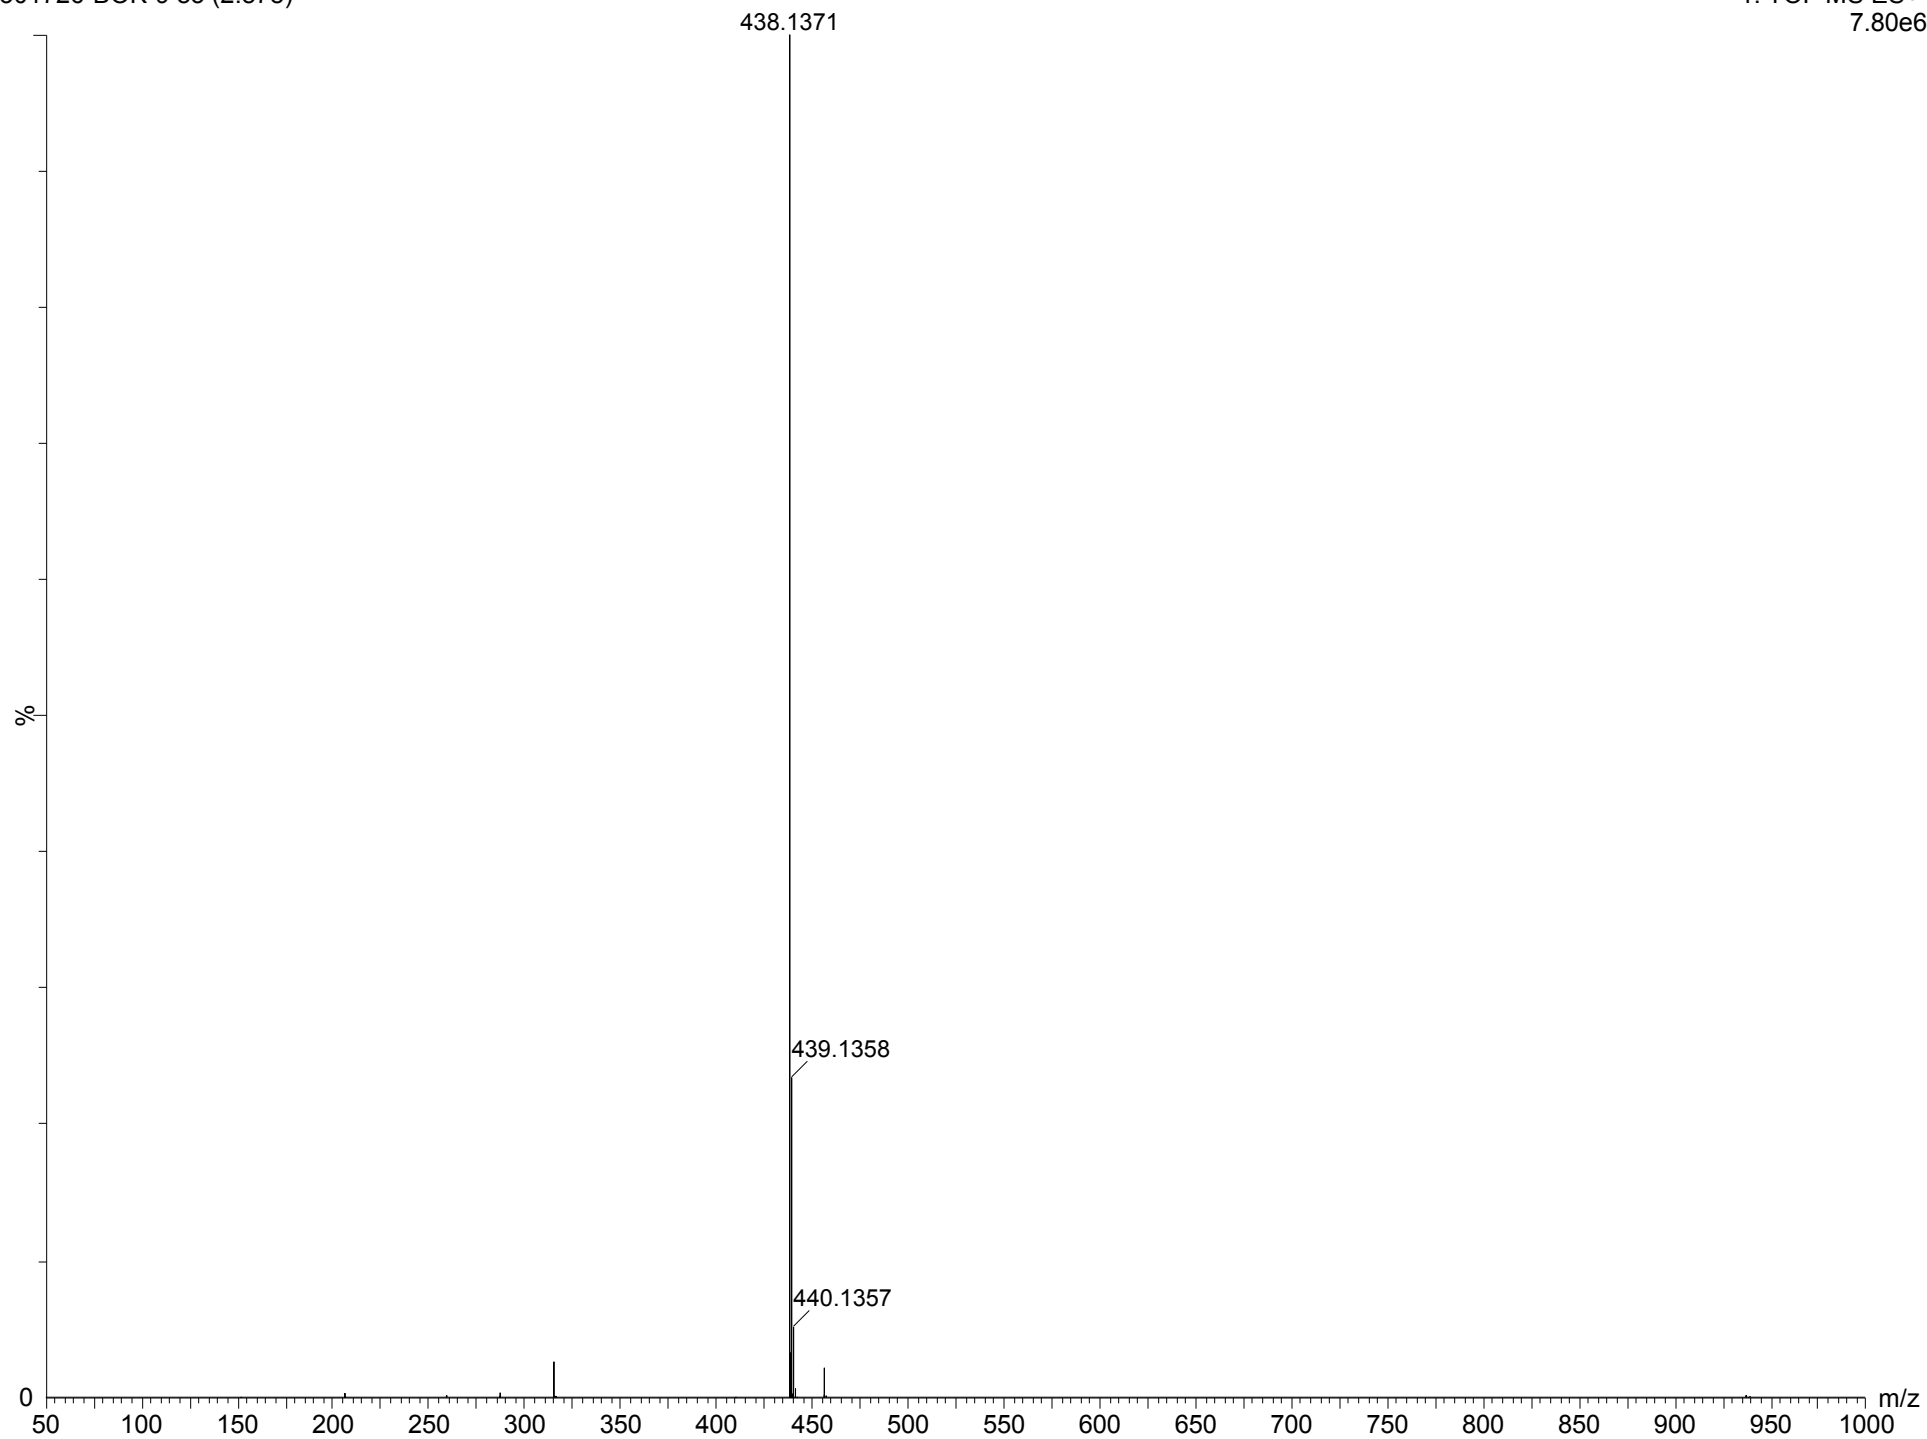

# COMPOUND 3j (BOK-10) SPECTRAL DATA

BOK-10  
<sup>1</sup>H-NMR in DMSO

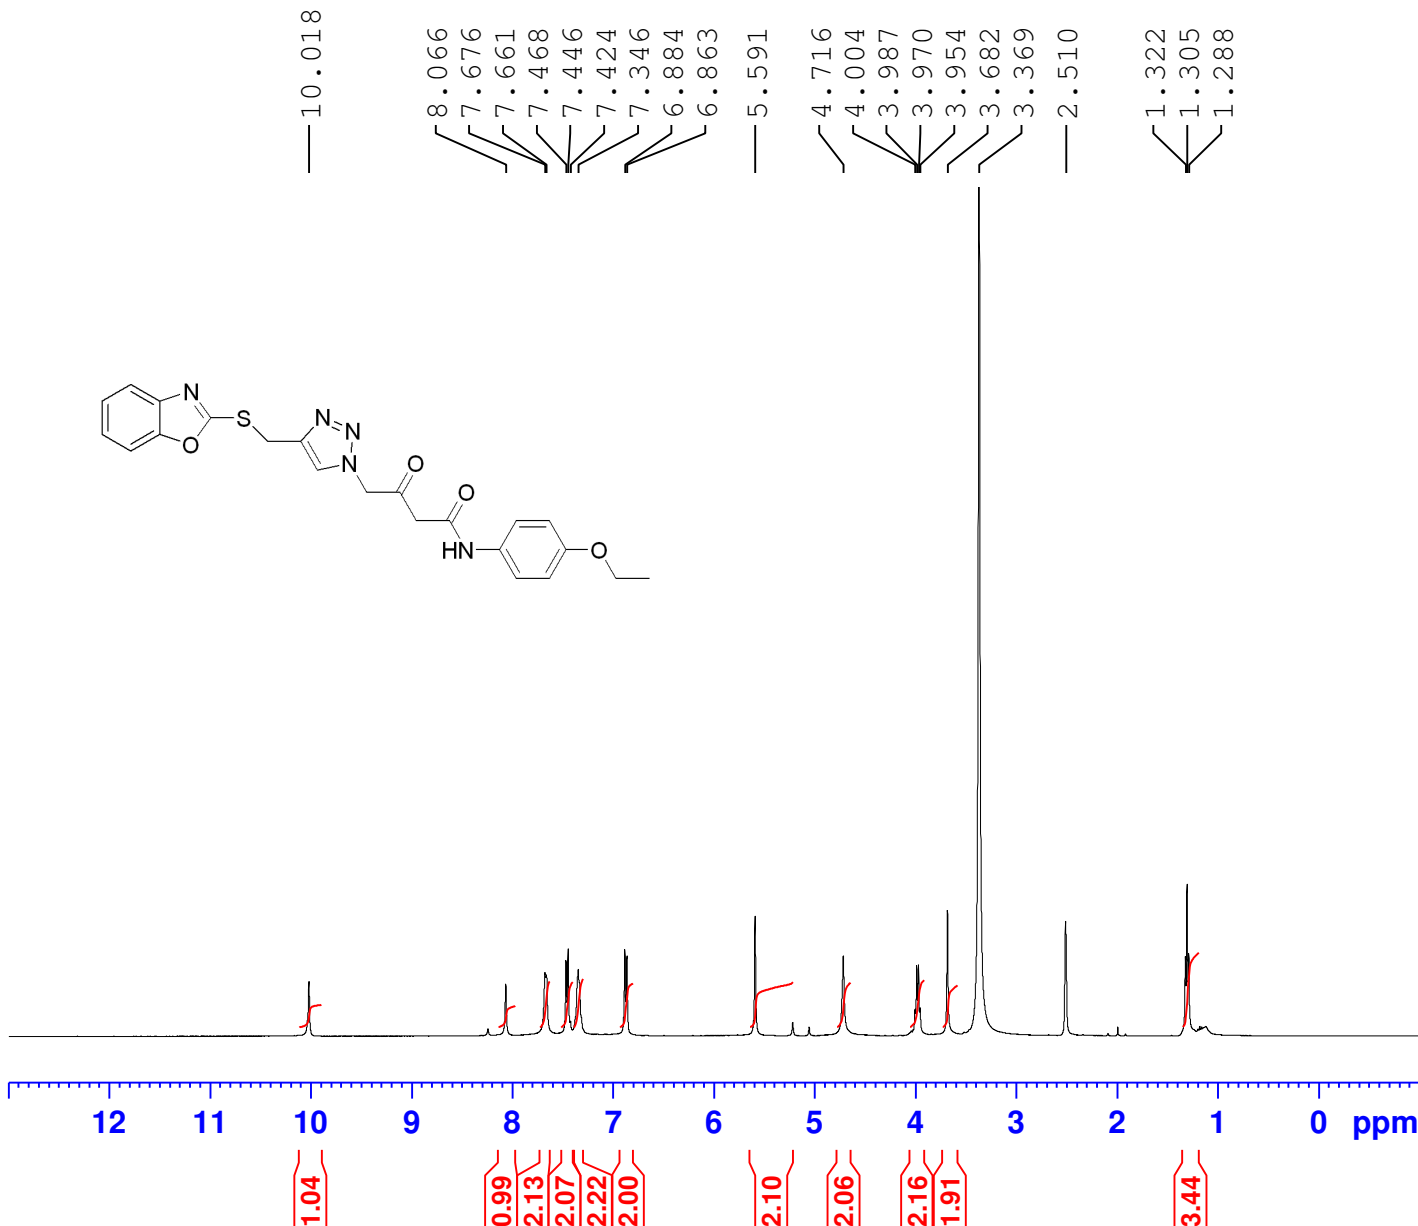

Current Data Parameters  
 NAME 23000512-Bo-4EO  
 EXPNO 1  
 PROCNO 1

F2 - Acquisition Parameters  
 Date\_ 20230520  
 Time 10.54 h  
 INSTRUM spect  
 PROBHD Z108618\_0984 (  
 PULPROG zg30  
 TD 65536  
 SOLVENT DMSO  
 NS 32  
 DS 2  
 SWH 8012.820 Hz  
 FIDRES 0.244532 Hz  
 AQ 4.0894465 sec  
 RG 32.13  
 DW 62.400 usec  
 DE 17.09 usec  
 TE 297.5 K  
 D1 1.00000000 sec  
 TD0 1  
 SFO1 400.3124719 MHz  
 NUC1 1H  
 P0 4.67 usec  
 P1 14.00 usec  
 PLW1 11.28999996 W

F2 - Processing parameters  
 SI 65536  
 SF 400.3100000 MHz  
 WDW EM  
 SSB 0  
 LB 0.30 Hz  
 GB 0  
 PC 1.00

BOK-10  
<sup>13</sup>C-NMR in DMSO

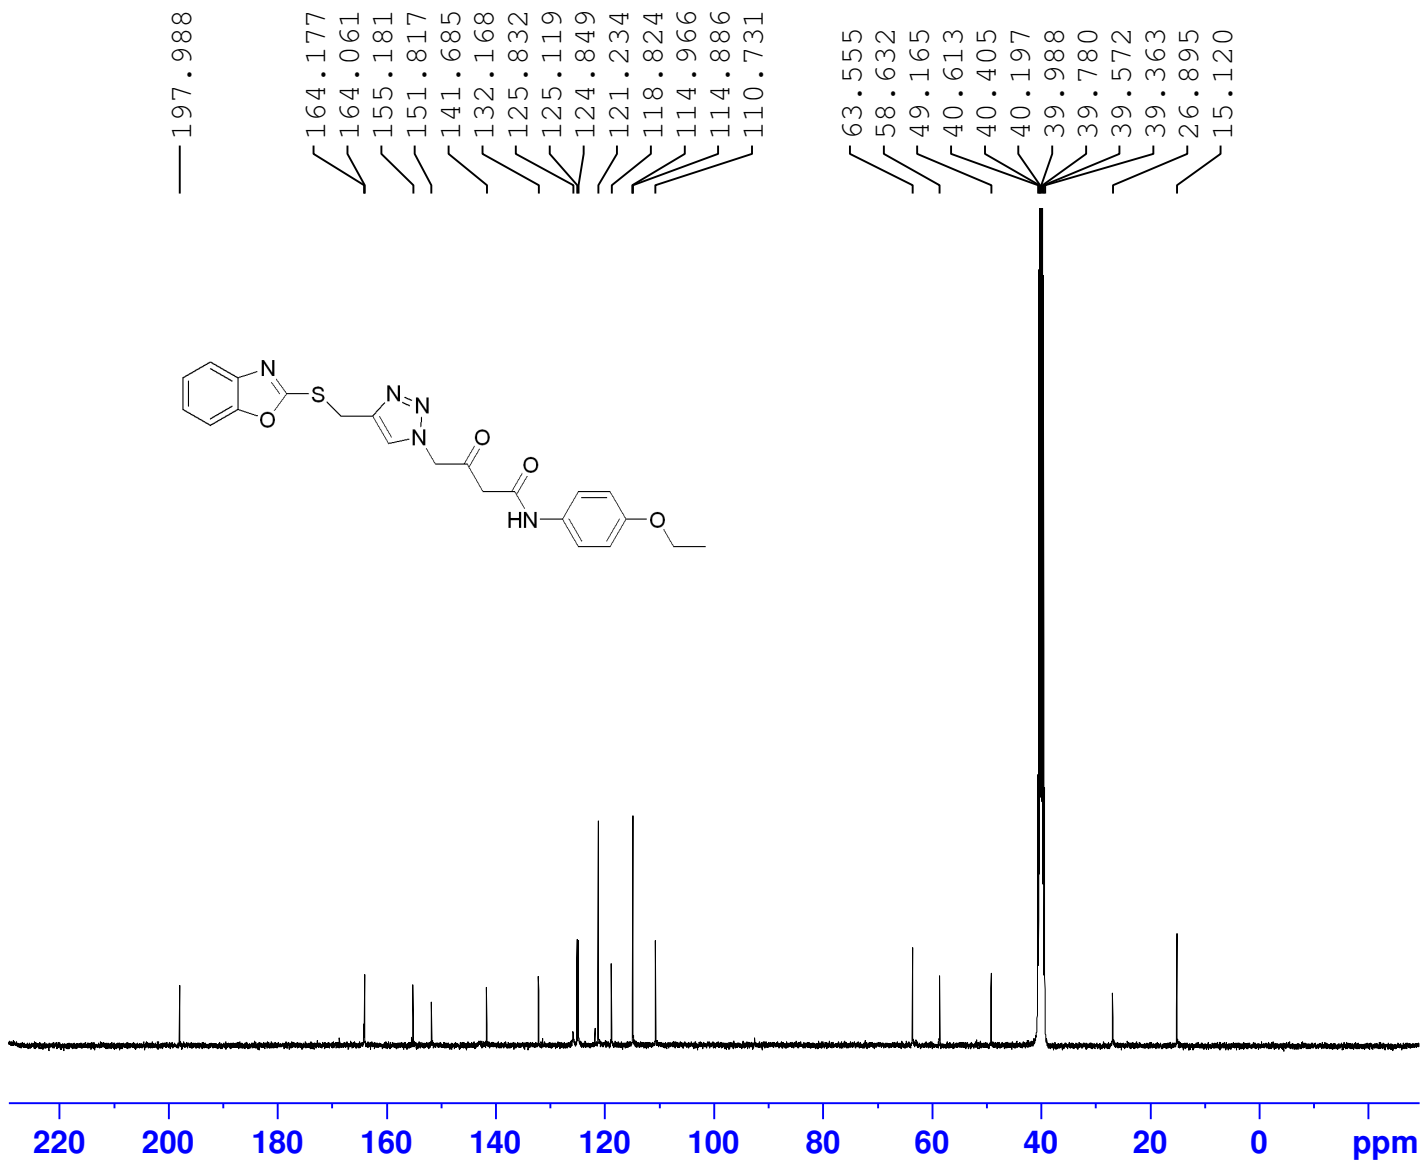

Current Data Parameters  
 NAME 23000512-Bo-4EO  
 EXPNO 2  
 PROCNO 1

F2 - Acquisition Parameters  
 Date\_ 20230522  
 Time 10.24 h  
 INSTRUM spect  
 PROBHD Z108618\_0984 (  
 PULPROG zgpg30  
 TD 65536  
 SOLVENT DMSO  
 NS 1024  
 DS 4  
 SWH 26041.666 Hz  
 FIDRES 0.794729 Hz  
 AQ 1.2582912 sec  
 RG 202.84  
 DW 19.200 usec  
 DE 6.50 usec  
 TE 298.8 K  
 D1 1.00000000 sec  
 D11 0.03000000 sec  
 TD0 1  
 SFO1 100.6680954 MHz  
 NUC1 13C  
 P0 3.33 usec  
 P1 10.00 usec  
 PLW1 51.0260098 W  
 SFO2 400.3116012 MHz  
 NUC2 1H  
 CPDPRG[2] waltz65  
 PCPD2 90.00 usec  
 PLW2 11.28999996 W  
 PLW12 0.27318001 W  
 PLW13 0.13741000 W

F2 - Processing parameters  
 SI 32768  
 SF 100.6580296 MHz  
 WDW EM  
 SSB 0  
 LB 1.00 Hz  
 GB 0  
 PC 1.40

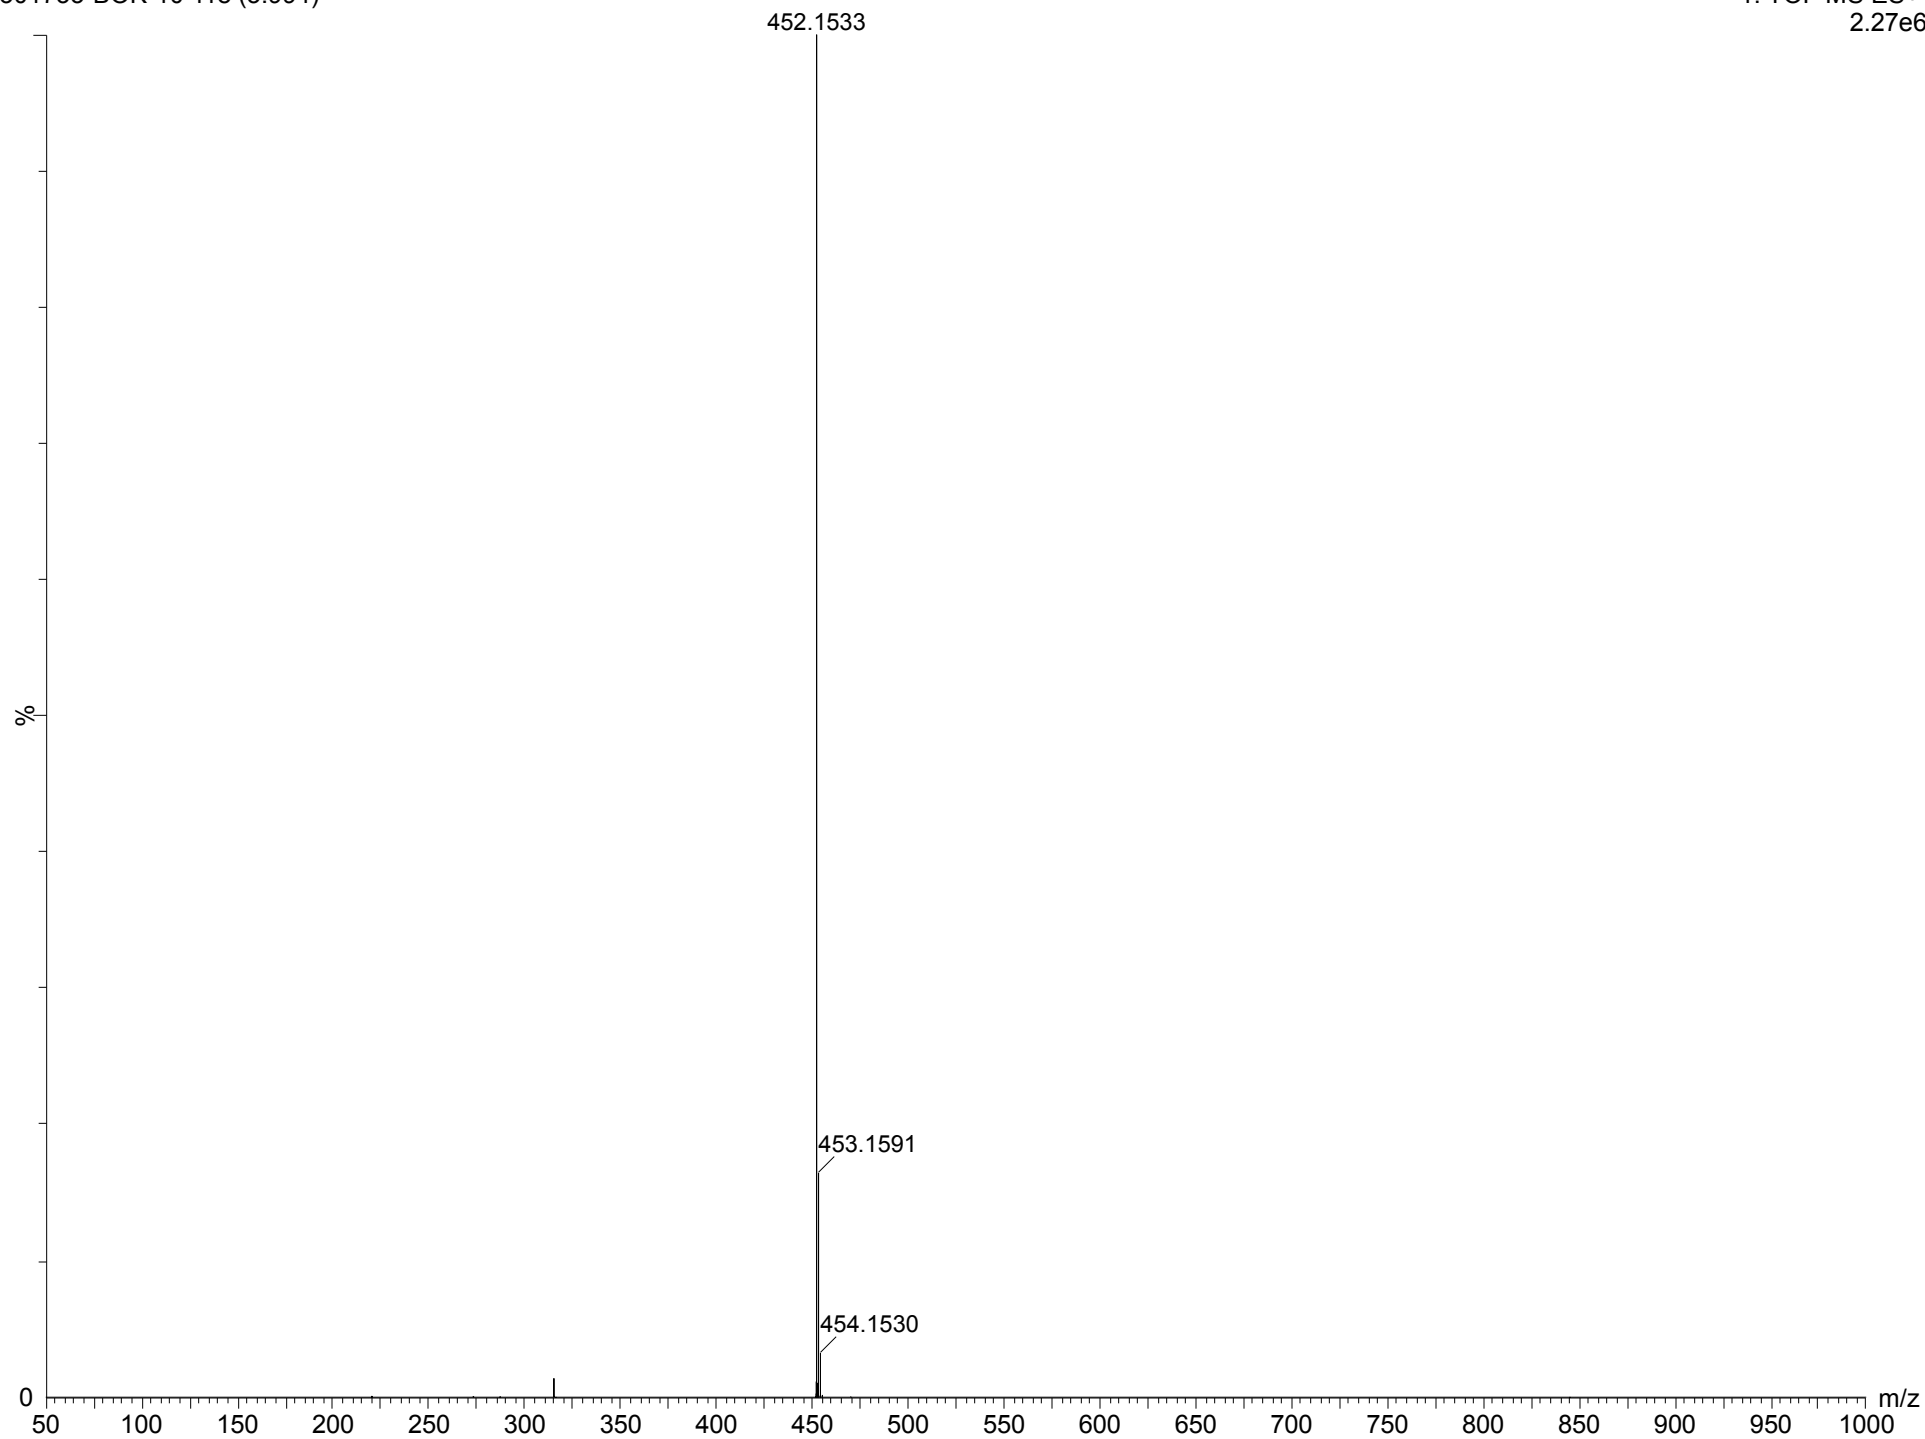

# COMPOUND 3k (BOP-1) SPECTRAL DATA

BOP-1  
<sup>1</sup>H-NMR in DMSO



8.212  
 8.055  
 8.036  
 7.745  
 7.726  
 7.708  
 7.674  
 7.659  
 7.652  
 7.612  
 7.593  
 7.574  
 7.350  
 7.341  
 7.331  
 6.202  
 — 4.791  
 — 3.427  
 — 2.883  
 — 2.728  
 — 2.510

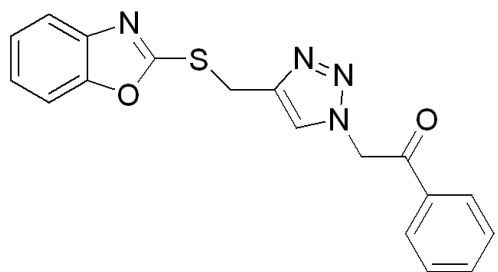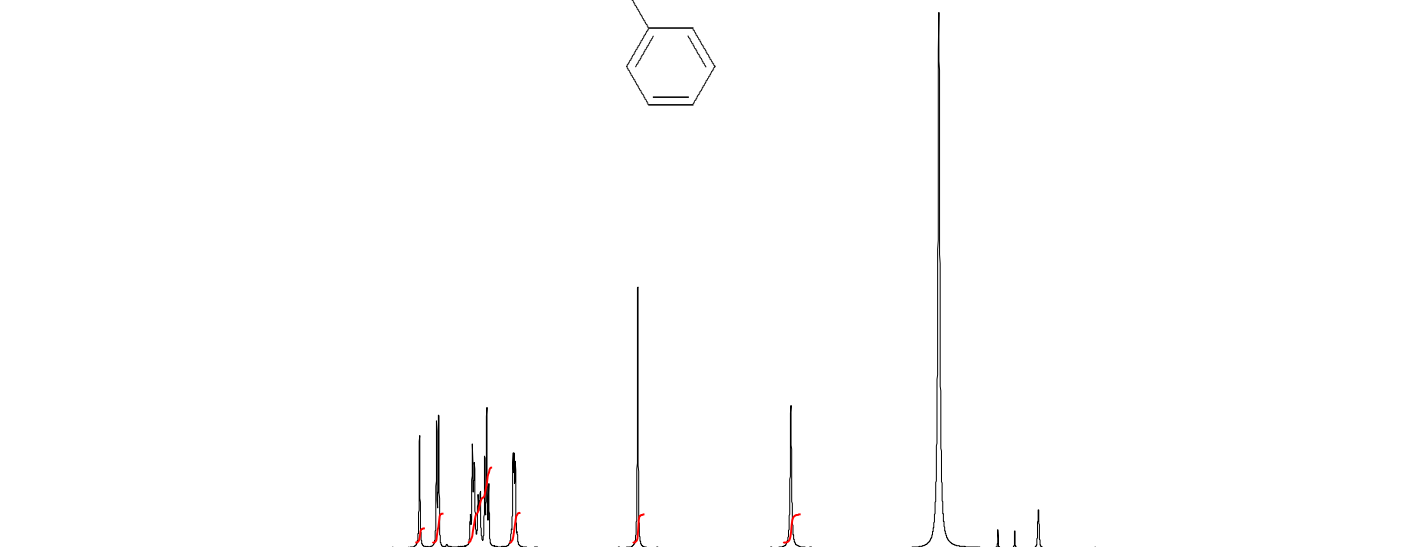

Current Data Parameters  
 NAME 23000787-Ph-BO  
 EXPNO 1  
 PROCNO 1

F2 - Acquisition Parameters  
 Date\_ 20230801  
 Time 9.19 h  
 INSTRUM spect  
 PROBHD Z108618\_0984 (  
 PULPROG zg30  
 TD 65536  
 SOLVENT DMSO  
 NS 16  
 DS 2  
 SWH 8012.820 Hz  
 FIDRES 0.244532 Hz  
 AQ 4.0894465 sec  
 RG 80.45  
 DW 62.400 usec  
 DE 17.09 usec  
 TE 297.0 K  
 D1 1.00000000 sec  
 TD0 1  
 SFO1 400.3124719 MHz  
 NUC1 1H  
 P0 4.67 usec  
 P1 14.00 usec  
 PLW1 11.28999996 W

F2 - Processing parameters  
 SI 65536  
 SF 400.3100000 MHz  
 WDW EM  
 SSB 0  
 LB 0.30 Hz  
 GB 0  
 PC 1.00

<sup>1</sup>H NMR spectrum of 2-(4-((benzo[d]oxazol-2-ylthio)methyl)-1H-1,2,3-triazol-1-yl)-1-phenylethan-1-one 3k (BOP-1).

BOP-1  
<sup>13</sup>C-NMR in DMSO

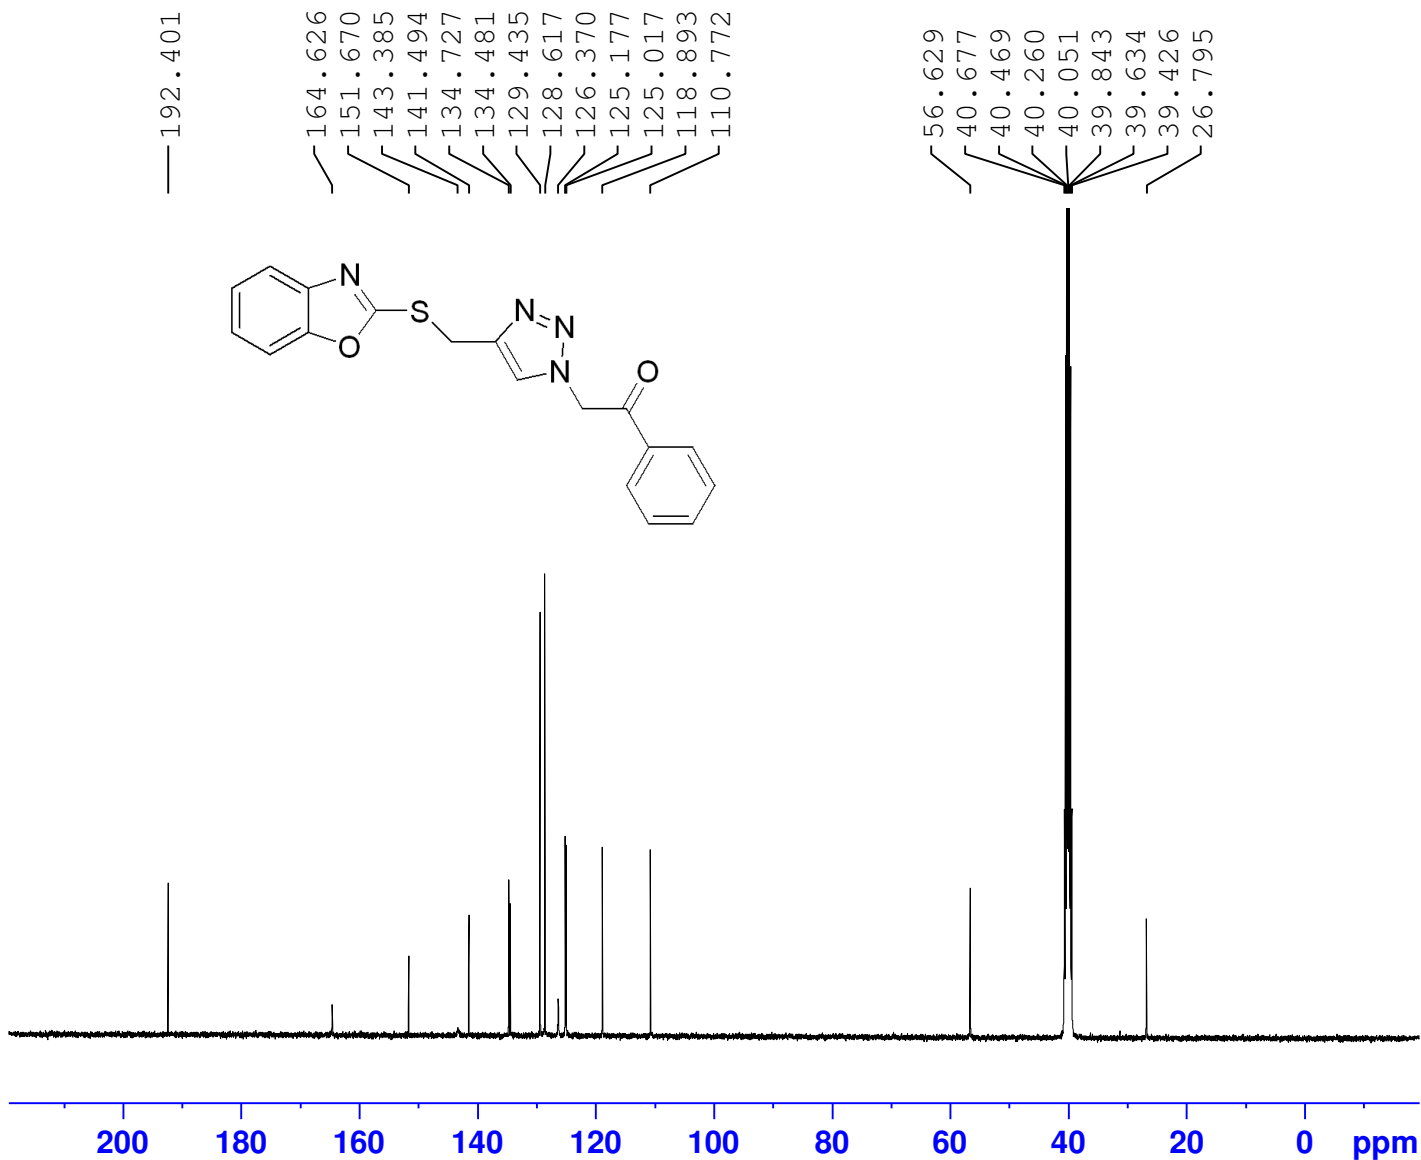

Current Data Parameters  
 NAME 23000787-Ph-BO  
 EXPNO 2  
 PROCNO 1

F2 - Acquisition Parameters  
 Date\_ 20230801  
 Time 10.02 h  
 INSTRUM spect  
 PROBHD Z108618\_0984 (  
 PULPROG zgpg30  
 TD 65536  
 SOLVENT DMSO  
 NS 1024  
 DS 4  
 SWH 24038.461 Hz  
 FIDRES 0.733596 Hz  
 AQ 1.3631488 sec  
 RG 2050  
 DW 20.800 usec  
 DE 6.50 usec  
 TE 297.2 K  
 D1 1.00000000 sec  
 D11 0.03000000 sec  
 TD0 1  
 SFO1 100.6680954 MHz  
 NUC1 13C  
 P0 3.33 usec  
 P1 10.00 usec  
 PLW1 51.02600098 W  
 SFO2 400.3116012 MHz  
 NUC2 1H  
 CPDPRG[2] waltz65  
 PCPD2 90.00 usec  
 PLW2 11.28999996 W  
 PLW12 0.27318001 W  
 PLW13 0.13741000 W

F2 - Processing parameters  
 SI 32768  
 SF 100.6580296 MHz  
 WDW EM  
 SSB 0  
 LB 1.00 Hz  
 GB 0  
 PC 1.40

<sup>13</sup>C NMR spectrum of 2-(4-((benzo[d]oxazol-2-ylthio)methyl)-1H-1,2,3-triazol-1-yl)-1-phenylethan-1-one **3k (BOP-1)**.



2301874-BOP-1 101 (3.478)

1: TOF MS ES+  
5.38e5

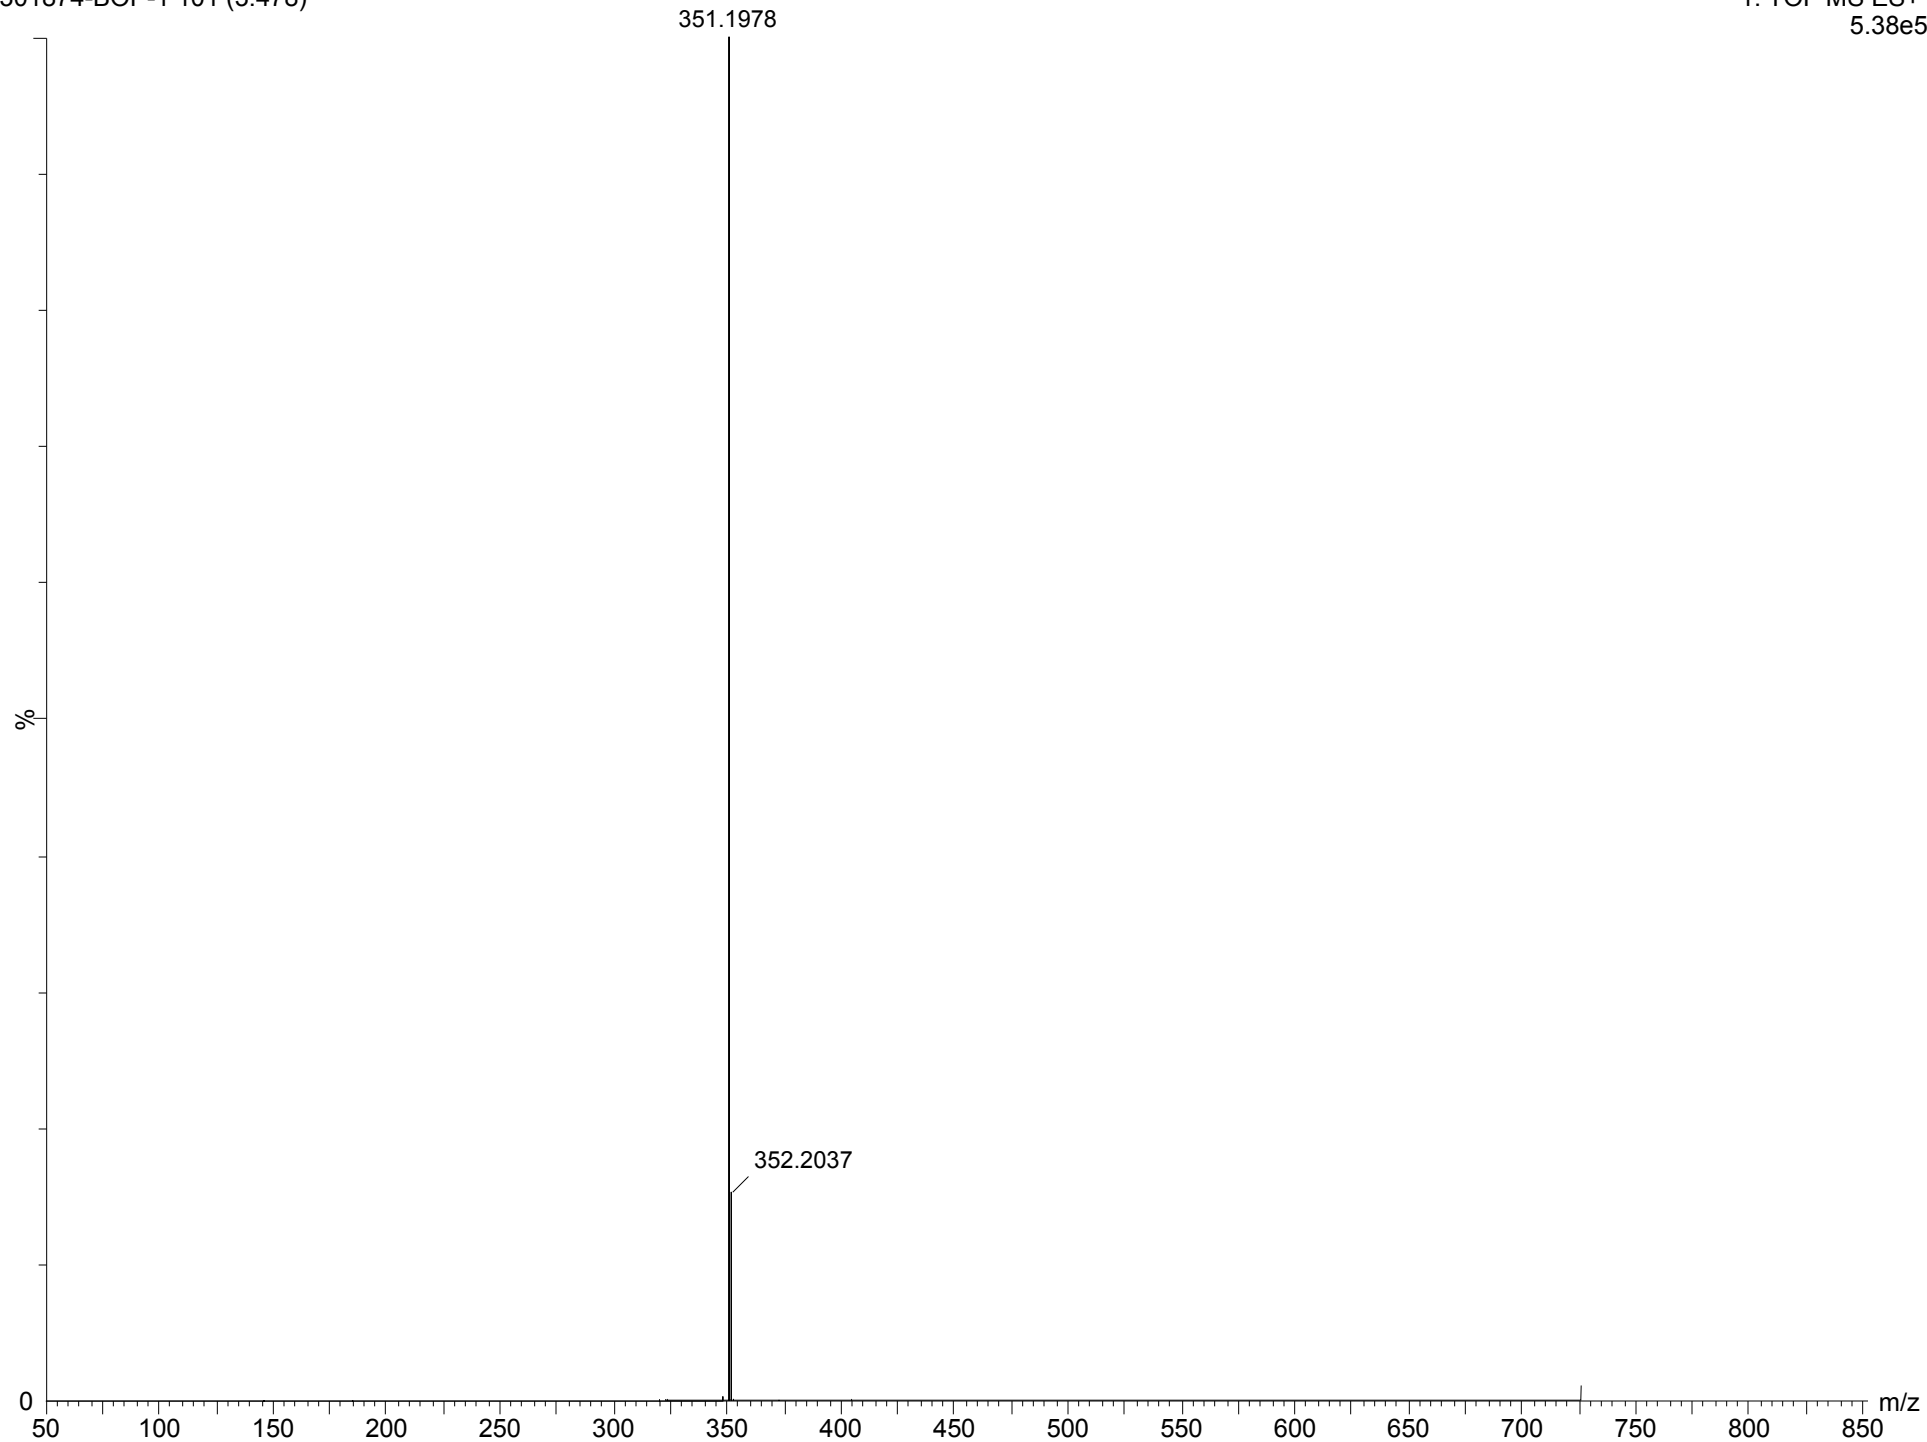

Mass spectrum of 2-(4-((benzo[d]oxazol-2-ylthio)methyl)-1H-1,2,3-triazol-1-yl)-1-phenylethan-1-one **3k (BOP-1)**.

# COMPOUND 3I (BOP-2) SPECTRAL DATA

BOP-2  
<sup>1</sup>H-NMR in DMSO



8.146  
 8.035  
 8.013  
 7.679  
 7.661  
 7.656  
 7.359  
 7.353  
 7.345  
 7.335  
 7.330  
 7.117  
 7.095  
 6.099  
 — 4.749  
 — 3.868  
 — 3.415  
 2.514  
 2.510  
 2.505

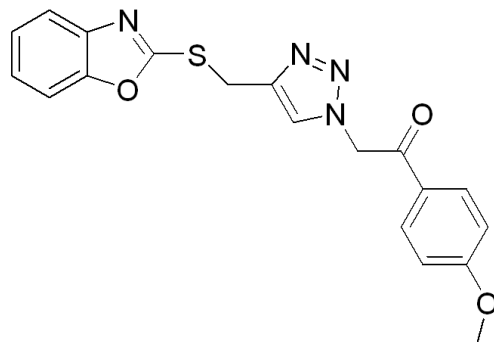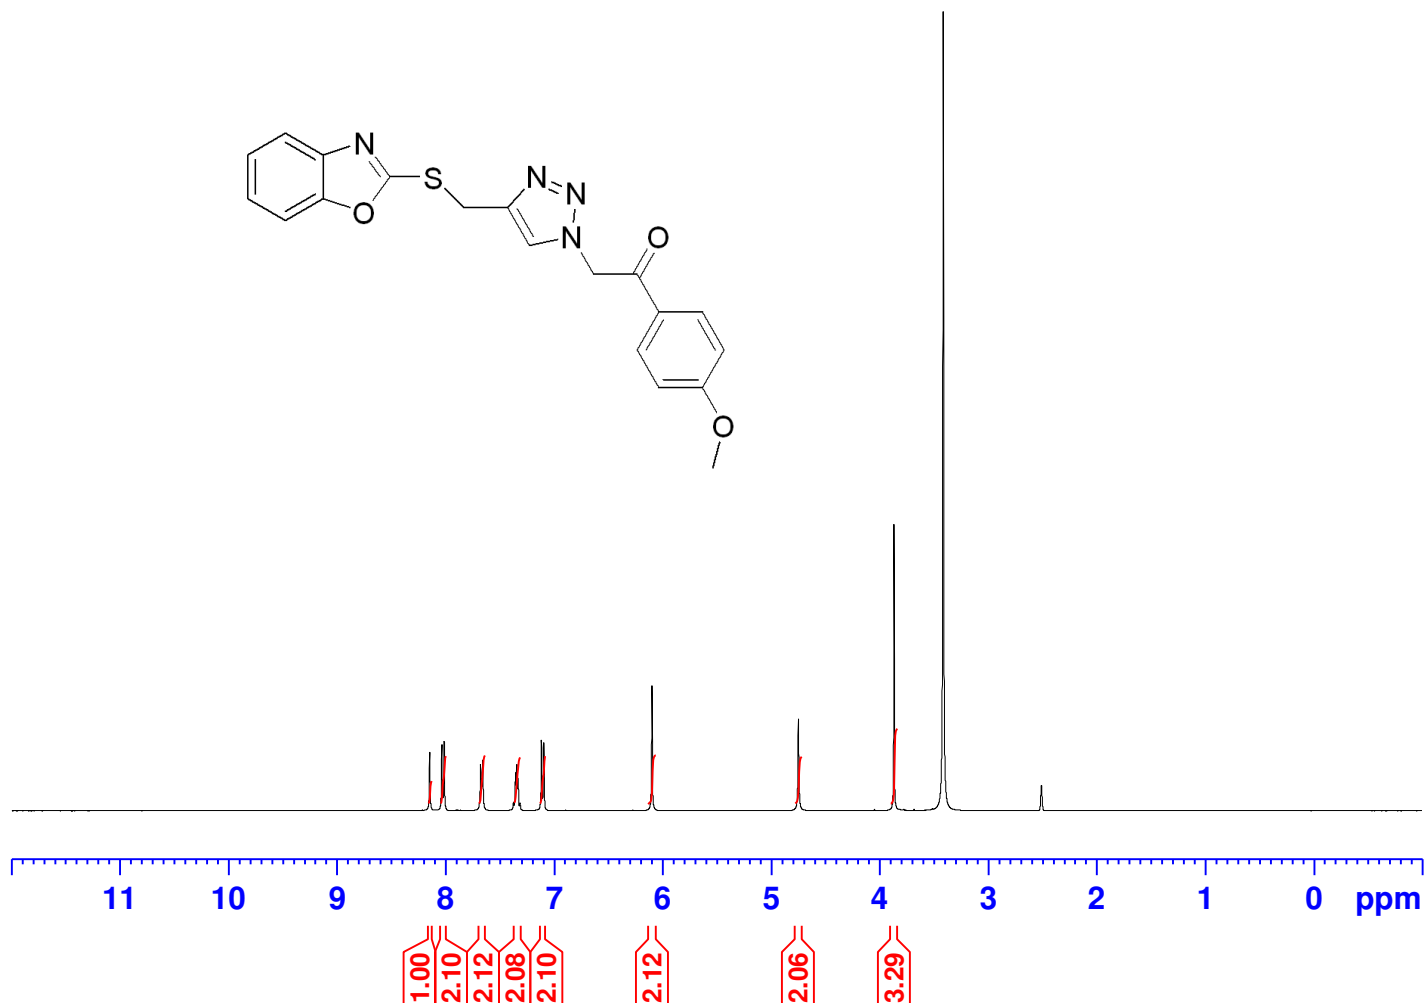

Current Data Parameters  
 NAME 23000789-4OCH3-PhBO  
 EXPNO 1  
 PROCNO 1

F2 - Acquisition Parameters  
 Date\_ 20230801  
 Time 10.32 h  
 INSTRUM spect  
 PROBHD Z108618\_0984 (  
 PULPROG zg30  
 TD 65536  
 SOLVENT DMSO  
 NS 16  
 DS 2  
 SWH 8012.820 Hz  
 FIDRES 0.244532 Hz  
 AQ 4.0894465 sec  
 RG 89.93  
 DW 62.400 usec  
 DE 17.09 usec  
 TE 297.2 K  
 D1 1.00000000 sec  
 TD0 1  
 SFO1 400.3124719 MHz  
 NUC1 1H  
 P0 4.67 usec  
 P1 14.00 usec  
 PLW1 11.28999996 W

F2 - Processing parameters  
 SI 65536  
 SF 400.3100000 MHz  
 WDW EM  
 SSB 0  
 LB 0.30 Hz  
 GB 0  
 PC 1.00

BOP-2  
<sup>13</sup>C-NMR in DMSO

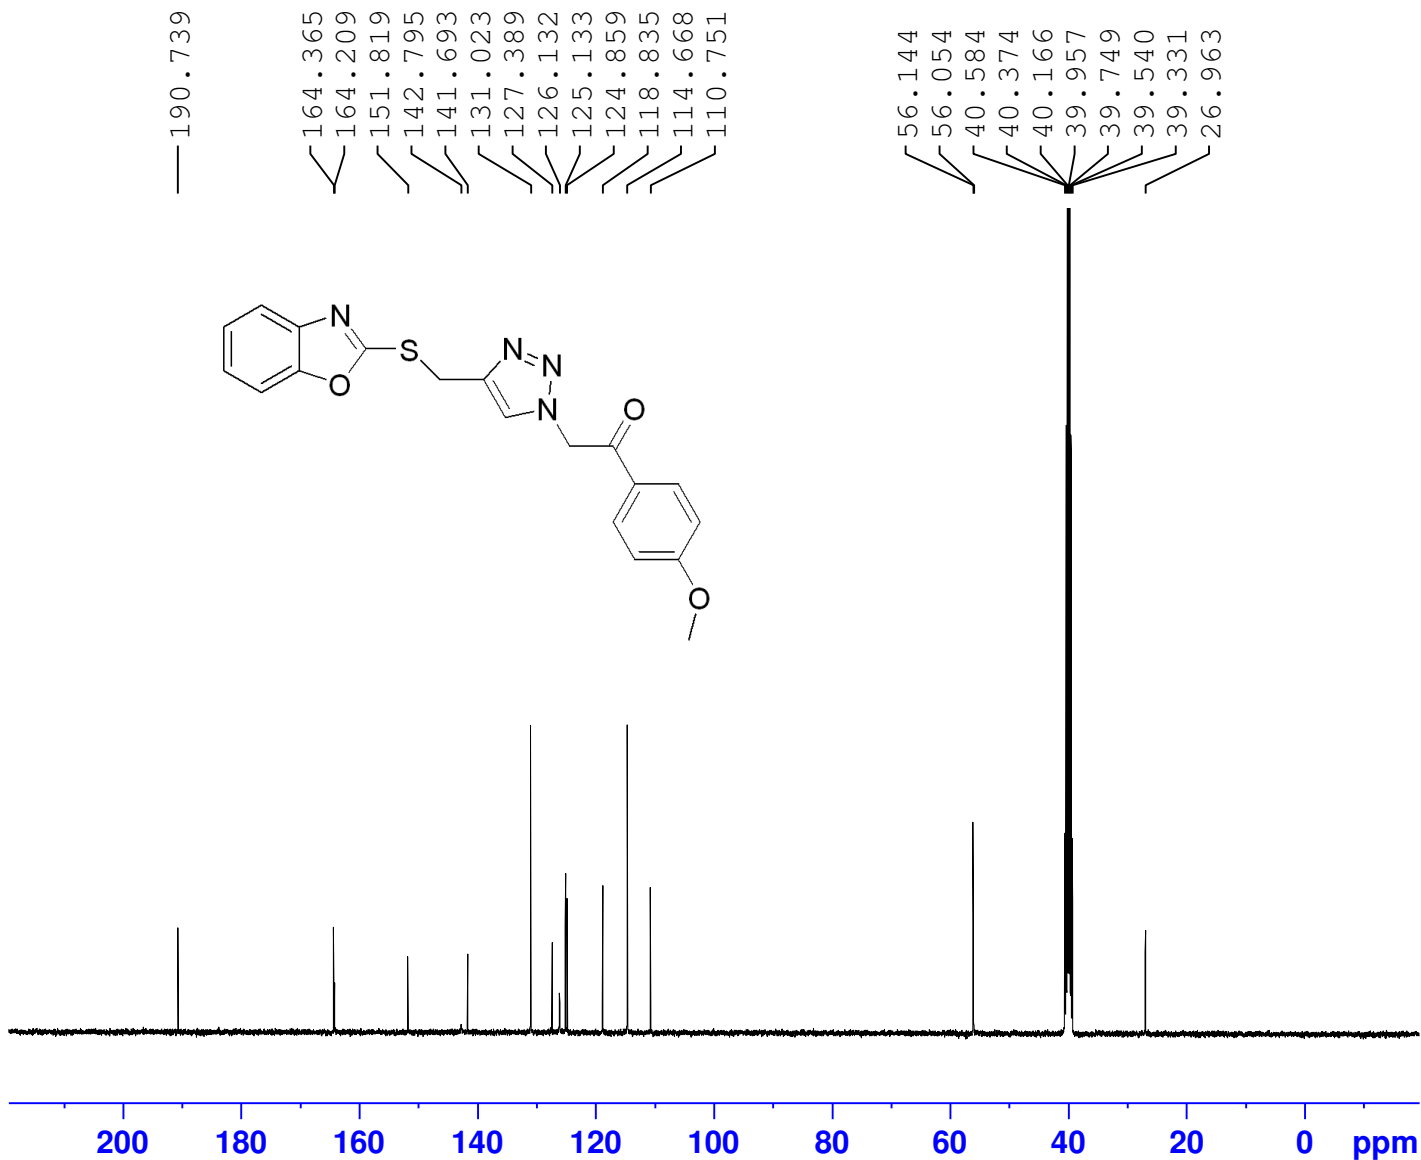

Current Data Parameters  
 NAME 23000789-4OCH3-PhBO  
 EXPNO 2  
 PROCNO 1

F2 - Acquisition Parameters  
 Date\_ 20230801  
 Time 11.16 h  
 INSTRUM spect  
 PROBHD Z108618\_0984 (  
 PULPROG zgpg30  
 TD 65536  
 SOLVENT DMSO  
 NS 1024  
 DS 4  
 SWH 24038.461 Hz  
 FIDRES 0.733596 Hz  
 AQ 1.3631488 sec  
 RG 2050  
 DW 20.800 usec  
 DE 6.50 usec  
 TE 298.5 K  
 D1 1.00000000 sec  
 D11 0.03000000 sec  
 TD0 1  
 SFO1 100.6680954 MHz  
 NUC1 13C  
 P0 3.33 usec  
 P1 10.00 usec  
 PLW1 51.02600098 W  
 SFO2 400.3116012 MHz  
 NUC2 1H  
 CPDPRG[2] waltz65  
 PCPD2 90.00 usec  
 PLW2 11.28999996 W  
 PLW12 0.27318001 W  
 PLW13 0.13741000 W

F2 - Processing parameters  
 SI 32768  
 SF 100.6580296 MHz  
 WDW EM  
 SSB 0  
 LB 1.00 Hz  
 GB 0  
 PC 1.40

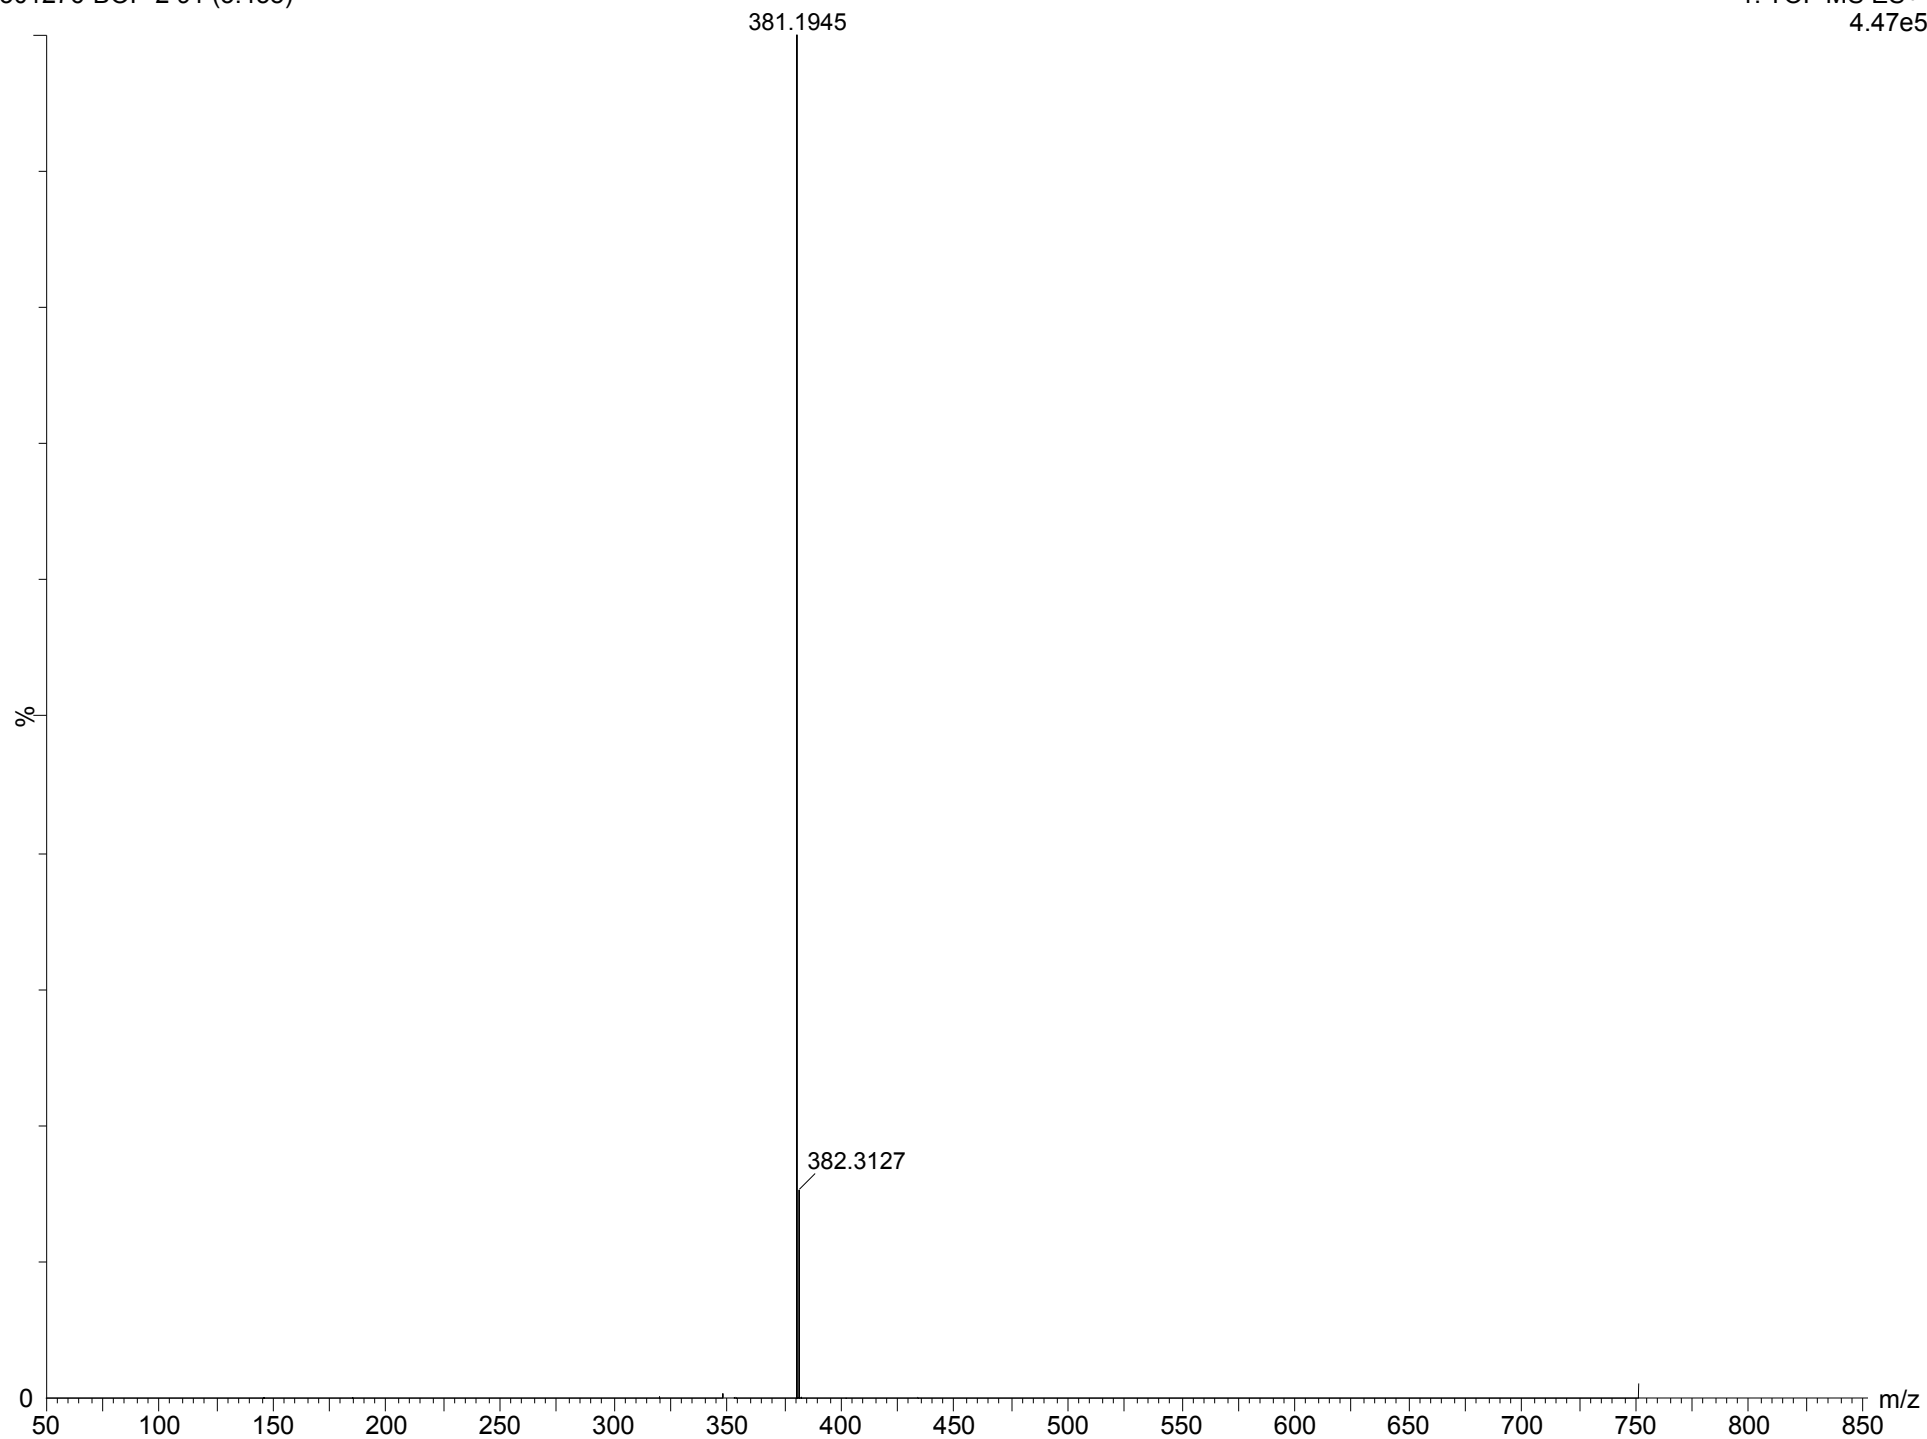

# COMPOUND 3m (BOP-3) SPECTRAL DATA

BOP-3  
<sup>1</sup>H-NMR in DMSO

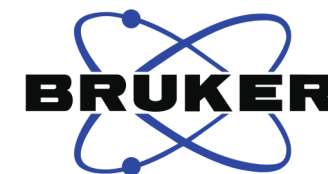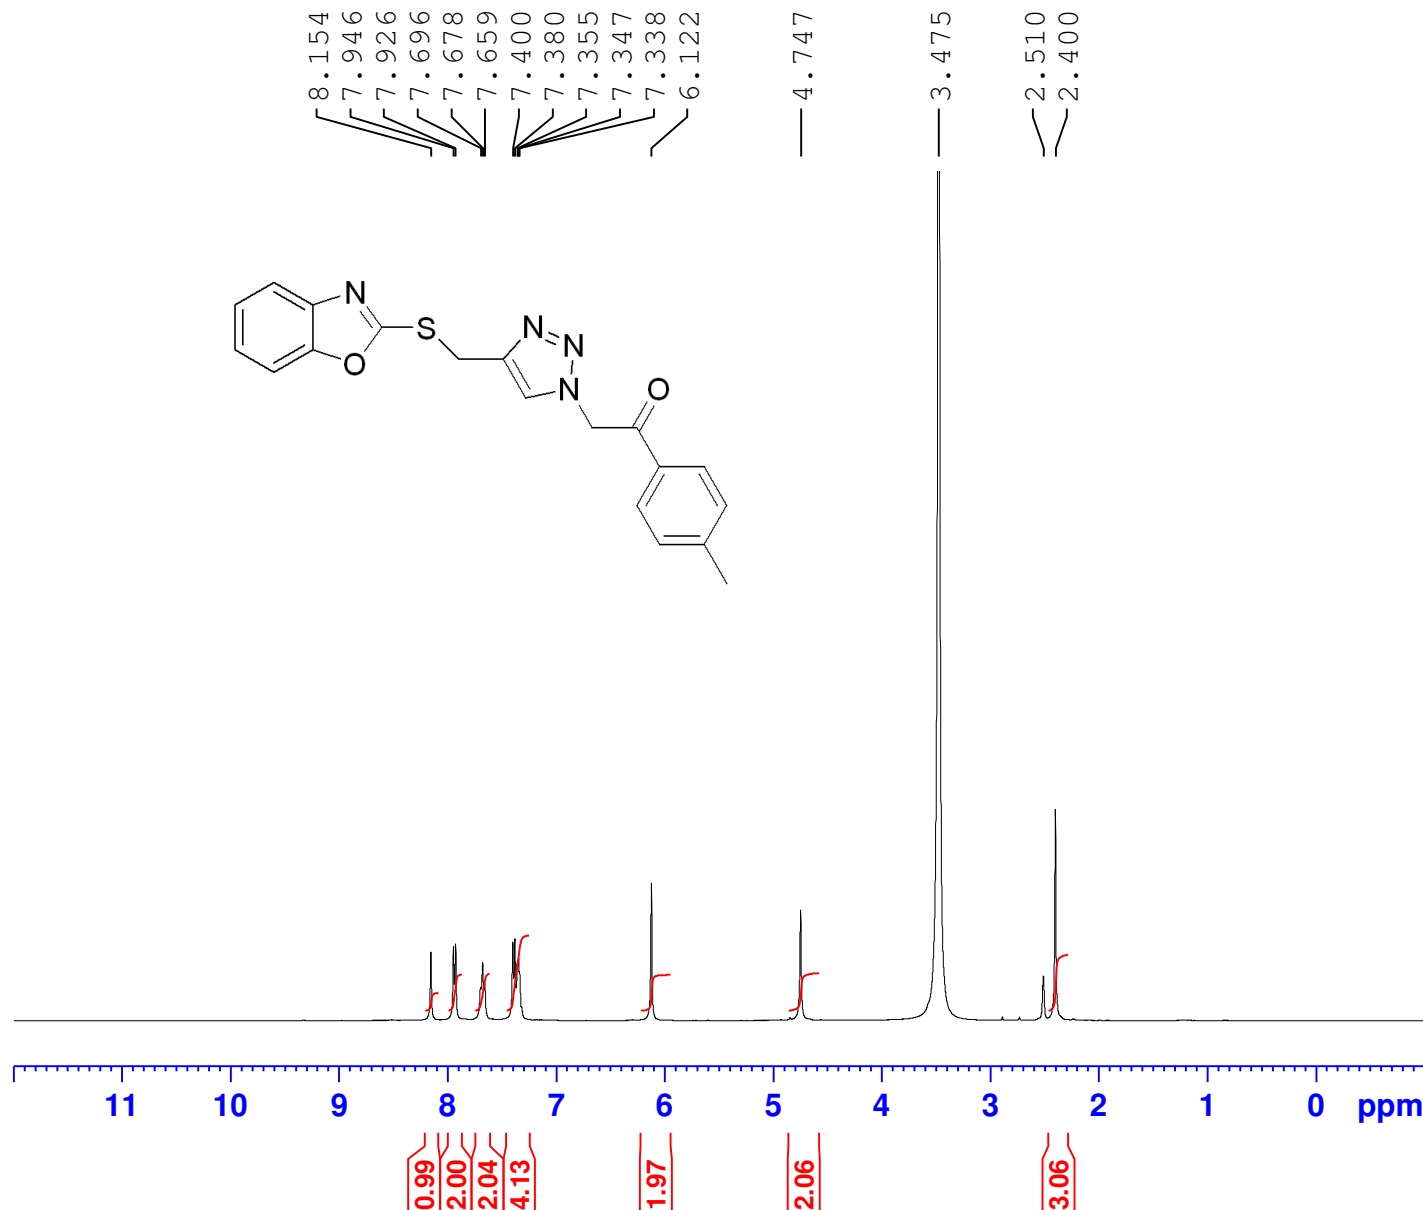

Current Data Parameters  
 NAME 23000622-4CH3-PhBo  
 EXPNO 1  
 PROCNO 1

F2 - Acquisition Parameters  
 Date\_ 20230628  
 Time 11.27 h  
 INSTRUM spect  
 PROBHD Z108618\_0984 (  
 PULPROG zg30  
 TD 65536  
 SOLVENT DMSO  
 NS 32  
 DS 2  
 SWH 8012.820 Hz  
 FIDRES 0.244532 Hz  
 AQ 4.0894465 sec  
 RG 32.13  
 DW 62.400 usec  
 DE 17.09 usec  
 TE 297.5 K  
 D1 1.00000000 sec  
 TD0 1  
 SFO1 400.3124719 MHz  
 NUC1 1H  
 P0 4.67 usec  
 P1 14.00 usec  
 PLW1 11.28999996 W

F2 - Processing parameters  
 SI 65536  
 SF 400.3100000 MHz  
 WDW EM  
 SSB 0  
 LB 0.30 Hz  
 GB 0  
 PC 1.00

<sup>1</sup>H NMR spectrum of 2-(4-((benzo[d]oxazol-2-ylthio)methyl)-1H-1,2,3-triazol-1-yl)-1-(p-tolyl)ethan-1-one 3m (BOP-3).

BOP-3  
<sup>13</sup>C-NMR in DMSO

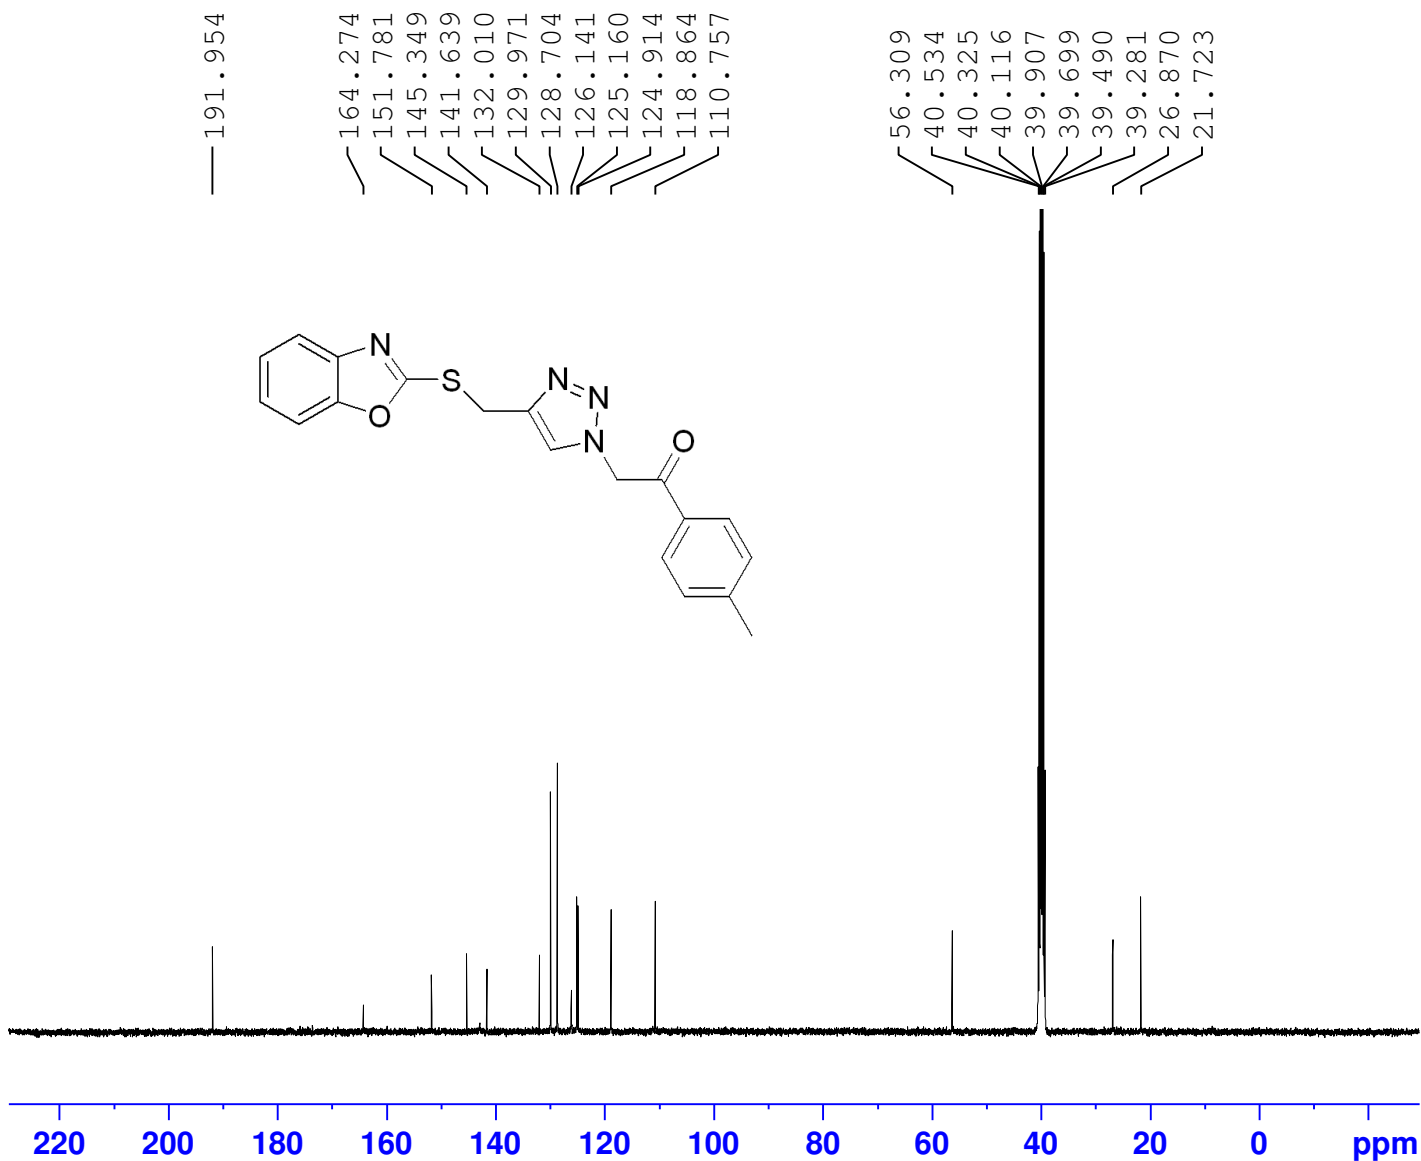

Current Data Parameters  
 NAME 23000622-4CH3-PhBo  
 EXPNO 2  
 PROCNO 1

F2 - Acquisition Parameters  
 Date\_ 20230628  
 Time 12.11 h  
 INSTRUM spect  
 PROBHD Z108618\_0984 (  
 PULPROG zgpg30  
 TD 65536  
 SOLVENT DMSO  
 NS 1128  
 DS 4  
 SWH 26041.666 Hz  
 FIDRES 0.794729 Hz  
 AQ 1.2582912 sec  
 RG 202.84  
 DW 19.200 usec  
 DE 6.50 usec  
 TE 298.6 K  
 D1 1.00000000 sec  
 D11 0.03000000 sec  
 TD0 1  
 SFO1 100.6680954 MHz  
 NUC1 13C  
 P0 3.33 usec  
 P1 10.00 usec  
 PLW1 51.02600098 W  
 SFO2 400.3116012 MHz  
 NUC2 1H  
 CPDPRG[2] waltz65  
 PCPD2 90.00 usec  
 PLW2 11.28999996 W  
 PLW12 0.27318001 W  
 PLW13 0.13741000 W

F2 - Processing parameters  
 SI 32768  
 SF 100.6580296 MHz  
 WDW EM  
 SSB 0  
 LB 1.00 Hz  
 GB 0  
 PC 1.40

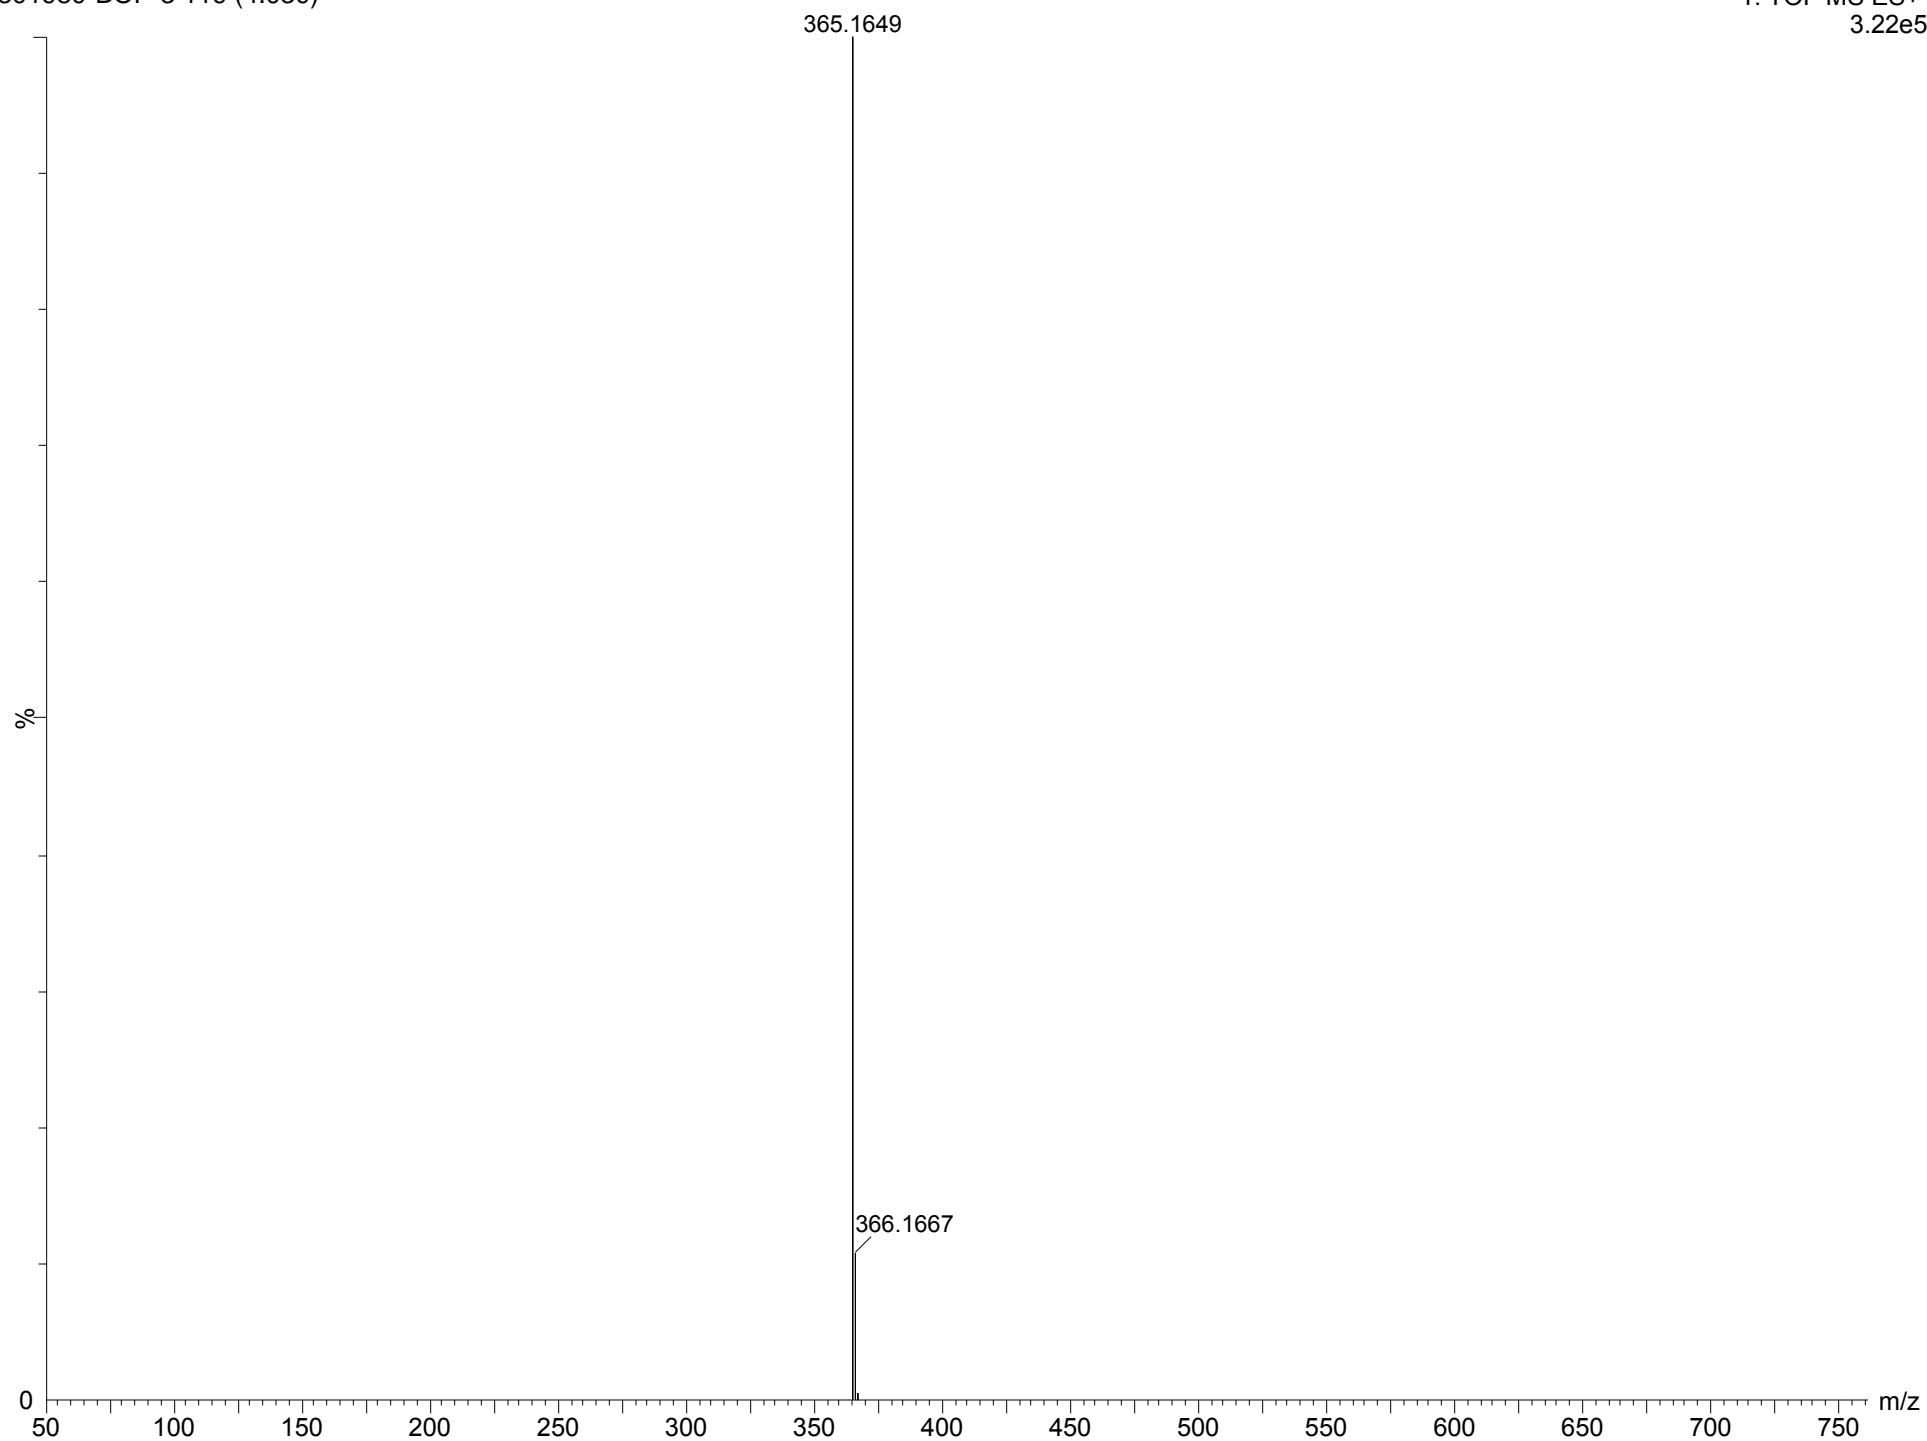

# COMPOUND 3n (BOP-4) SPECTRAL DATA

BOP-4  
<sup>1</sup>H-NMR in DMSO



8.166  
 8.150  
 8.137  
 8.129  
 8.115  
 7.689  
 7.668  
 7.650  
 7.645  
 7.443  
 7.421  
 7.399  
 7.347  
 7.338  
 7.328  
 6.173  
 — 4.759  
 — 3.445  
 2.513  
 2.509  
 2.505

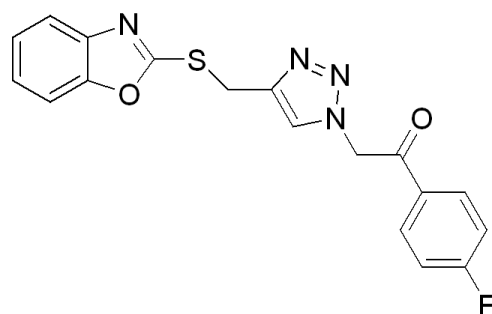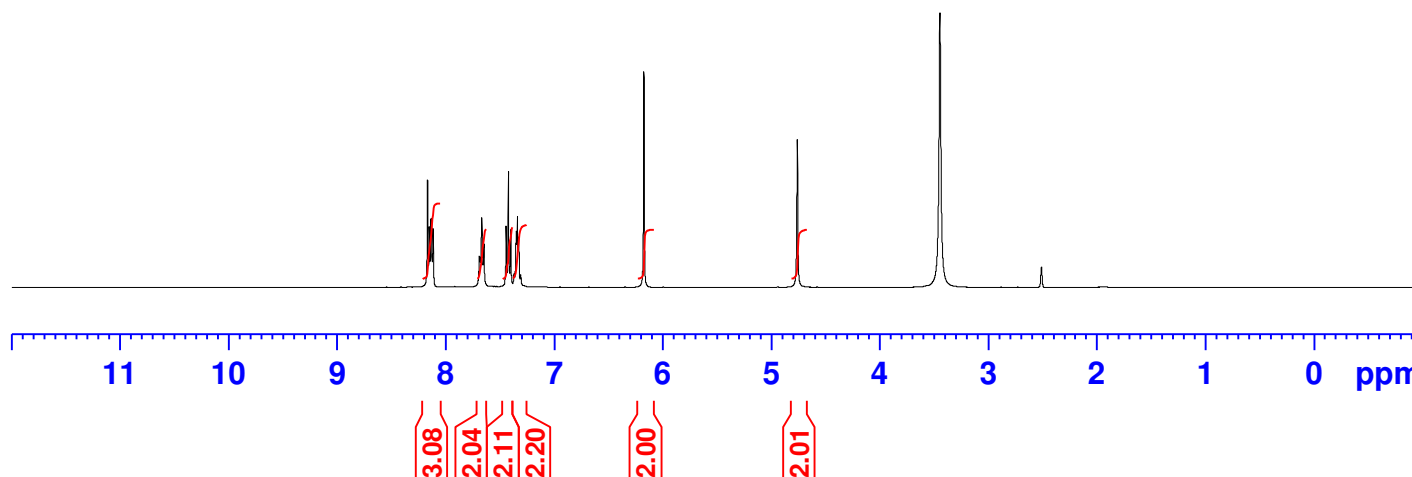

Current Data Parameters  
 NAME 23000788-4F-Ph-BO  
 EXPNO 1  
 PROCNO 1

F2 - Acquisition Parameters  
 Date\_ 20230801  
 Time 10.06 h  
 INSTRUM spect  
 PROBHD Z108618\_0984 (  
 PULPROG zg30  
 TD 65536  
 SOLVENT DMSO  
 NS 16  
 DS 2  
 SWH 8012.820 Hz  
 FIDRES 0.244532 Hz  
 AQ 4.0894465 sec  
 RG 73.11  
 DW 62.400 usec  
 DE 17.09 usec  
 TE 297.2 K  
 D1 1.00000000 sec  
 TD0 1  
 SFO1 400.3124719 MHz  
 NUC1 1H  
 P0 4.67 usec  
 P1 14.00 usec  
 PLW1 11.28999996 W

F2 - Processing parameters  
 SI 65536  
 SF 400.3100000 MHz  
 WDW EM  
 SSB 0  
 LB 0.30 Hz  
 GB 0  
 PC 1.00

<sup>1</sup>H NMR spectrum of 2-(4-((benzo[d]oxazol-2-ylthio)methyl)-1H-1,2,3-triazol-1-yl)-1-(4-fluorophenyl)ethan-1-one **3n (BOP-4)**.



BOP-4  
<sup>13</sup>C-NMR in DMSO

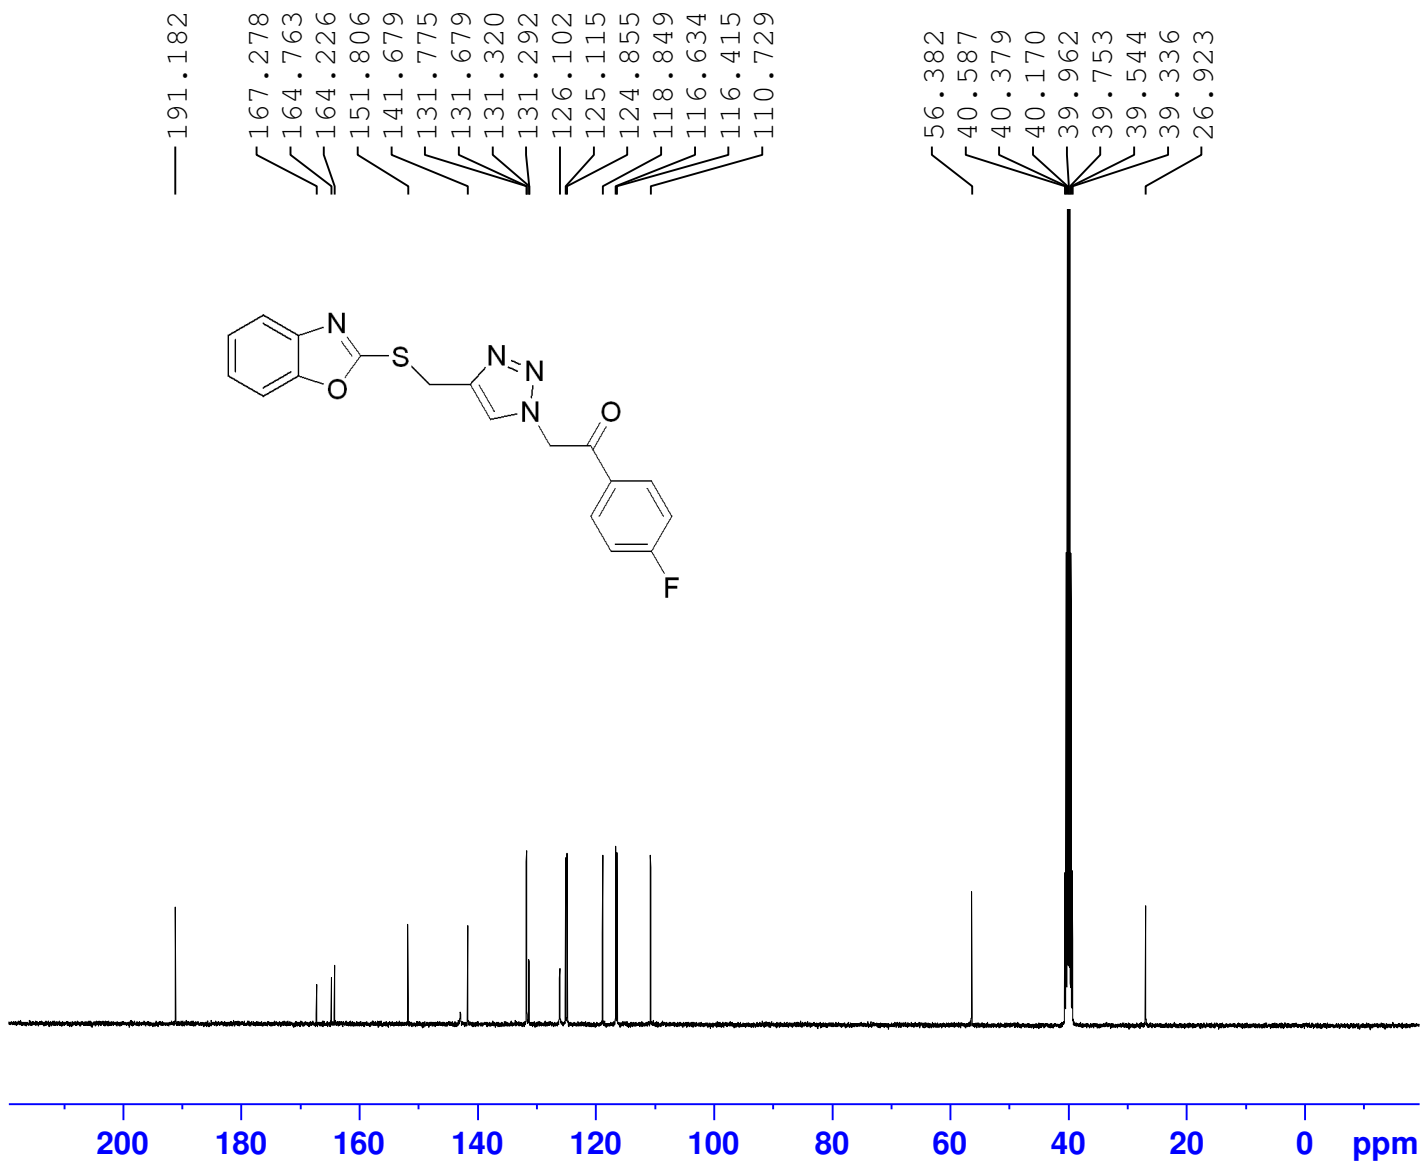

Current Data Parameters  
 NAME 23000788-4F-Ph-BO  
 EXPNO 2  
 PROCNO 1

F2 - Acquisition Parameters  
 Date\_ 20230801  
 Time 10.28 h  
 INSTRUM spect  
 PROBHD Z108618\_0984 (  
 PULPROG zgpg30  
 TD 65536  
 SOLVENT DMSO  
 NS 512  
 DS 4  
 SWH 24038.461 Hz  
 FIDRES 0.733596 Hz  
 AQ 1.3631488 sec  
 RG 2050  
 DW 20.800 usec  
 DE 6.50 usec  
 TE 298.2 K  
 D1 1.00000000 sec  
 D11 0.03000000 sec  
 TD0 1  
 SFO1 100.6680954 MHz  
 NUC1 13C  
 P0 3.33 usec  
 P1 10.00 usec  
 PLW1 51.02600098 W  
 SFO2 400.3116012 MHz  
 NUC2 1H  
 CPDPRG[2] waltz65  
 PCPD2 90.00 usec  
 PLW2 11.28999996 W  
 PLW12 0.27318001 W  
 PLW13 0.13741000 W

F2 - Processing parameters  
 SI 32768  
 SF 100.6580296 MHz  
 WDW EM  
 SSB 0  
 LB 1.00 Hz  
 GB 0  
 PC 1.40

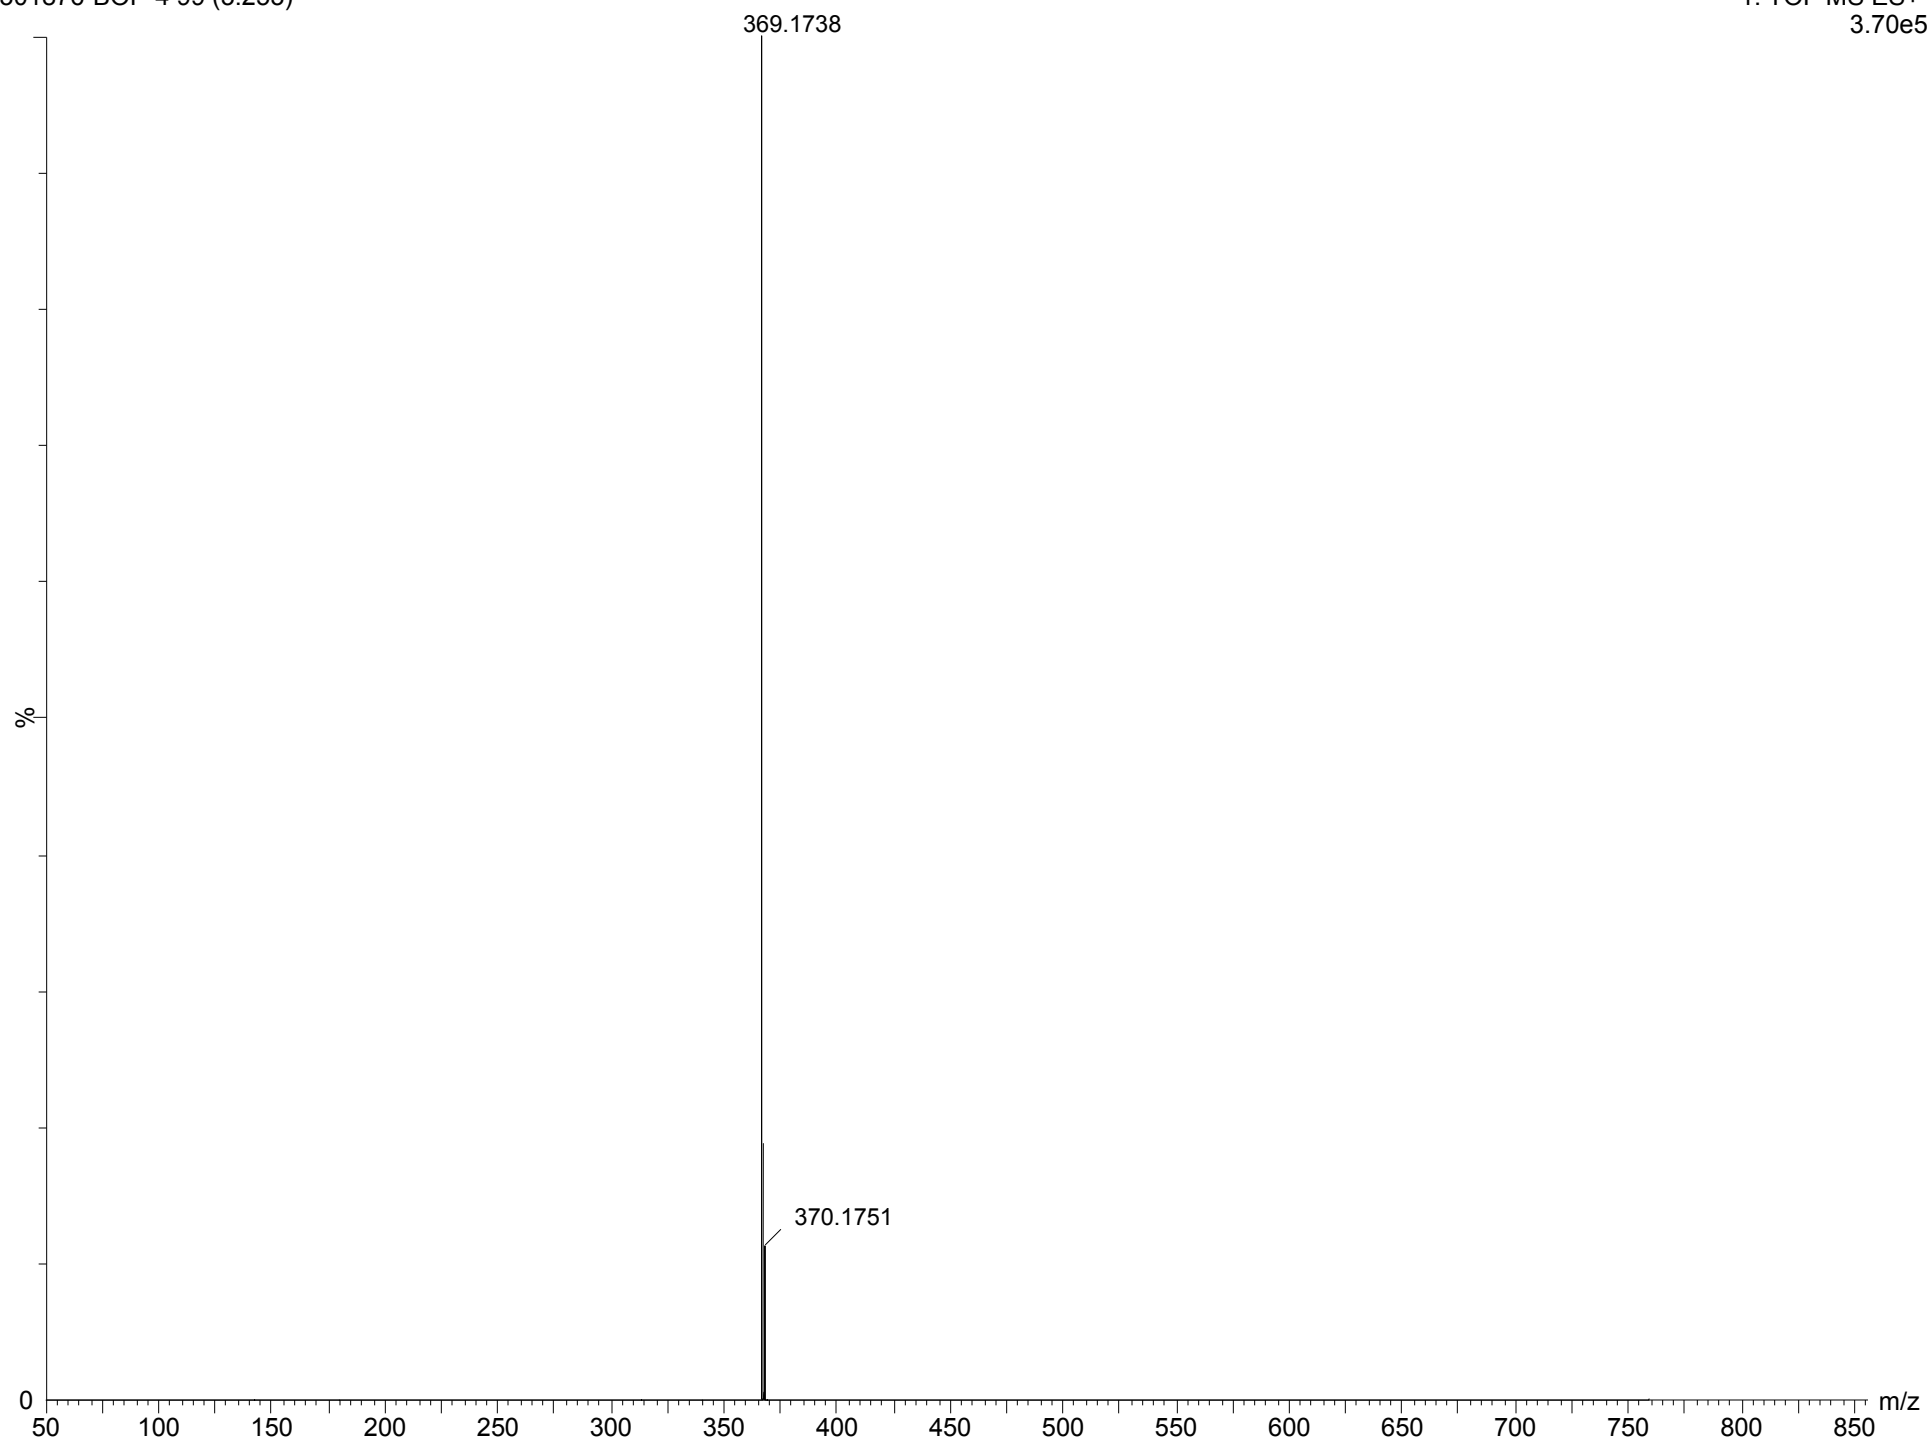

Mass spectrum of 2-(4-((benzo[d]oxazol-2-ylthio)methyl)-1H-1,2,3-triazol-1-yl)-1-(4-fluorophenyl)ethan-1-one **3n (BOP-4)**.

# COMPOUND 3o (BOP-5) SPECTRAL DATA

BOP-5  
<sup>1</sup>H-NMR in DMSO

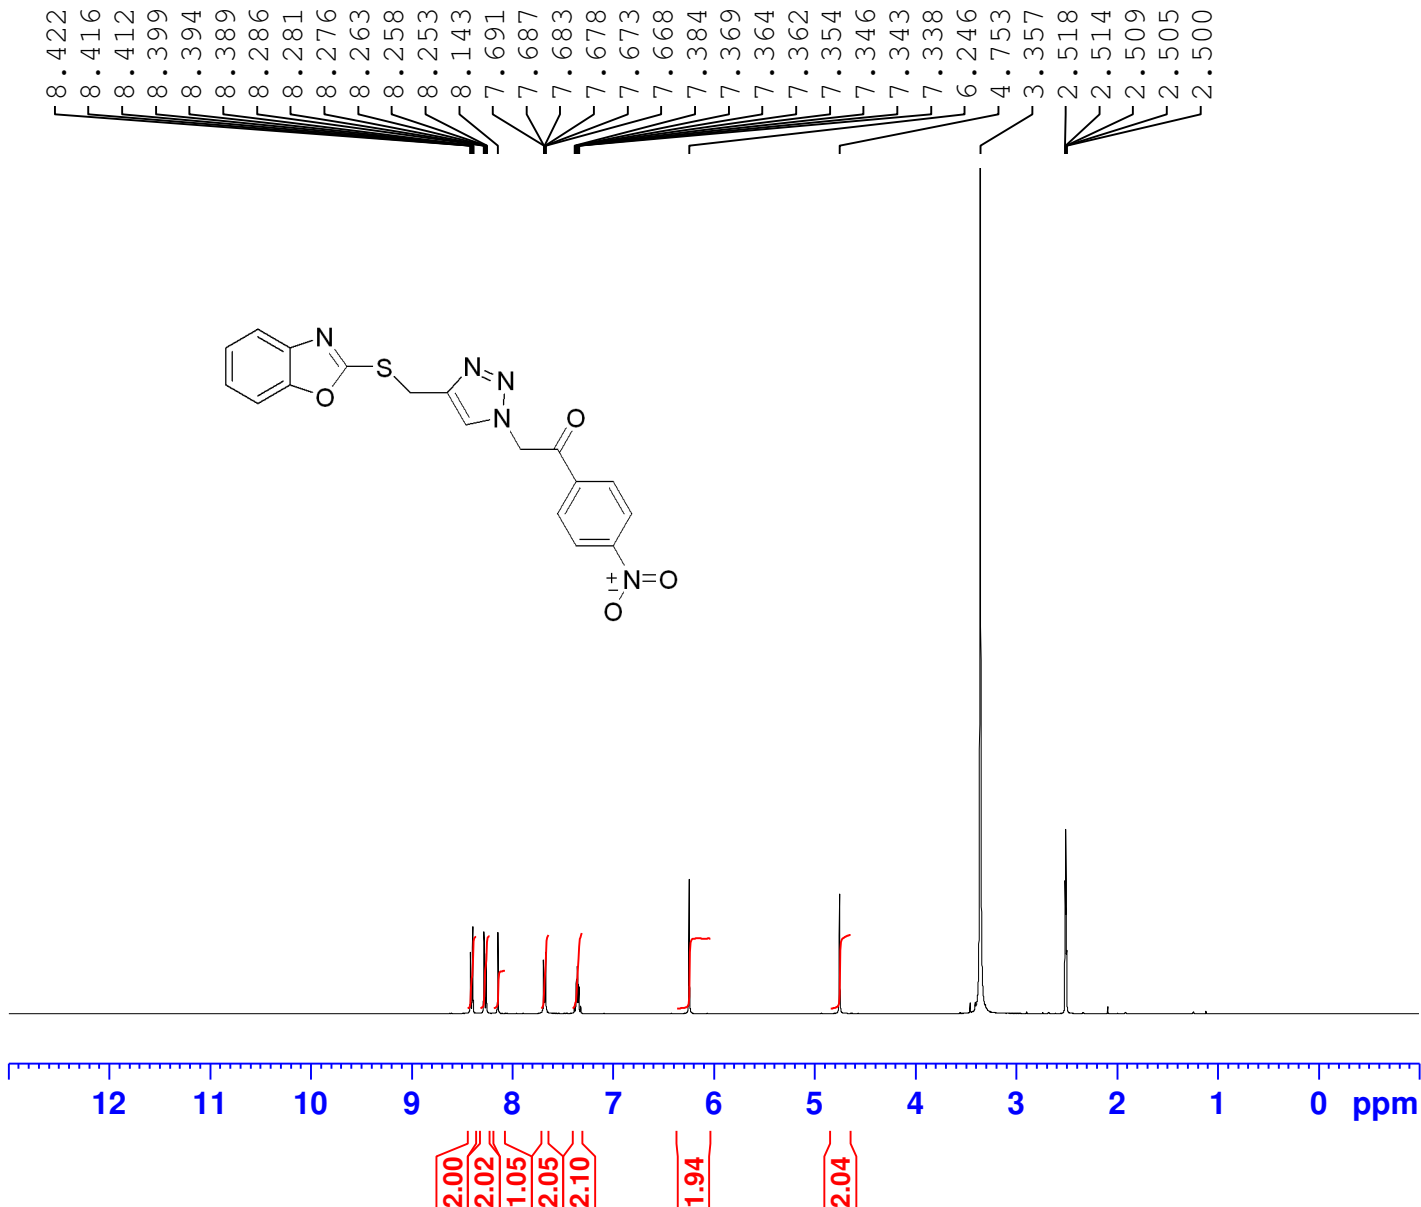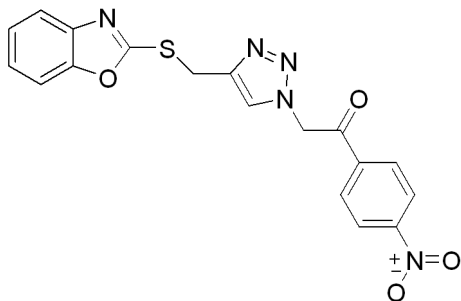

Current Data Parameters  
 NAME 23000514-4No2-PhBO  
 EXPNO 1  
 PROCNO 1

F2 - Acquisition Parameters  
 Date\_ 20230520  
 Time 11.02 h  
 INSTRUM spect  
 PROBHD Z108618\_0984 (  
 PULPROG zg30  
 TD 65536  
 SOLVENT DMSO  
 NS 32  
 DS 2  
 SWH 8012.820 Hz  
 FIDRES 0.244532 Hz  
 AQ 4.0894465 sec  
 RG 32.13  
 DW 62.400 usec  
 DE 17.09 usec  
 TE 297.5 K  
 D1 1.00000000 sec  
 TD0 1  
 SFO1 400.3124719 MHz  
 NUC1 1H  
 P0 4.67 usec  
 P1 14.00 usec  
 PLW1 11.28999996 W

F2 - Processing parameters  
 SI 65536  
 SF 400.3100000 MHz  
 WDW EM  
 SSB 0  
 LB 0.30 Hz  
 GB 0  
 PC 1.00

<sup>1</sup>H NMR spectrum of 2-(4-((benzo[d]oxazol-2-ylthio)methyl)-1H-1,2,3-triazol-1-yl)-1-(4-nitrophenyl)ethan-1-one **3o (BOP-5)**.

BOP-5  
<sup>13</sup>C-NMR in DMSO

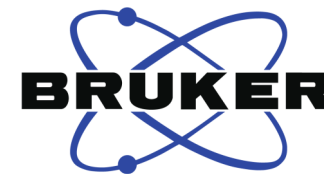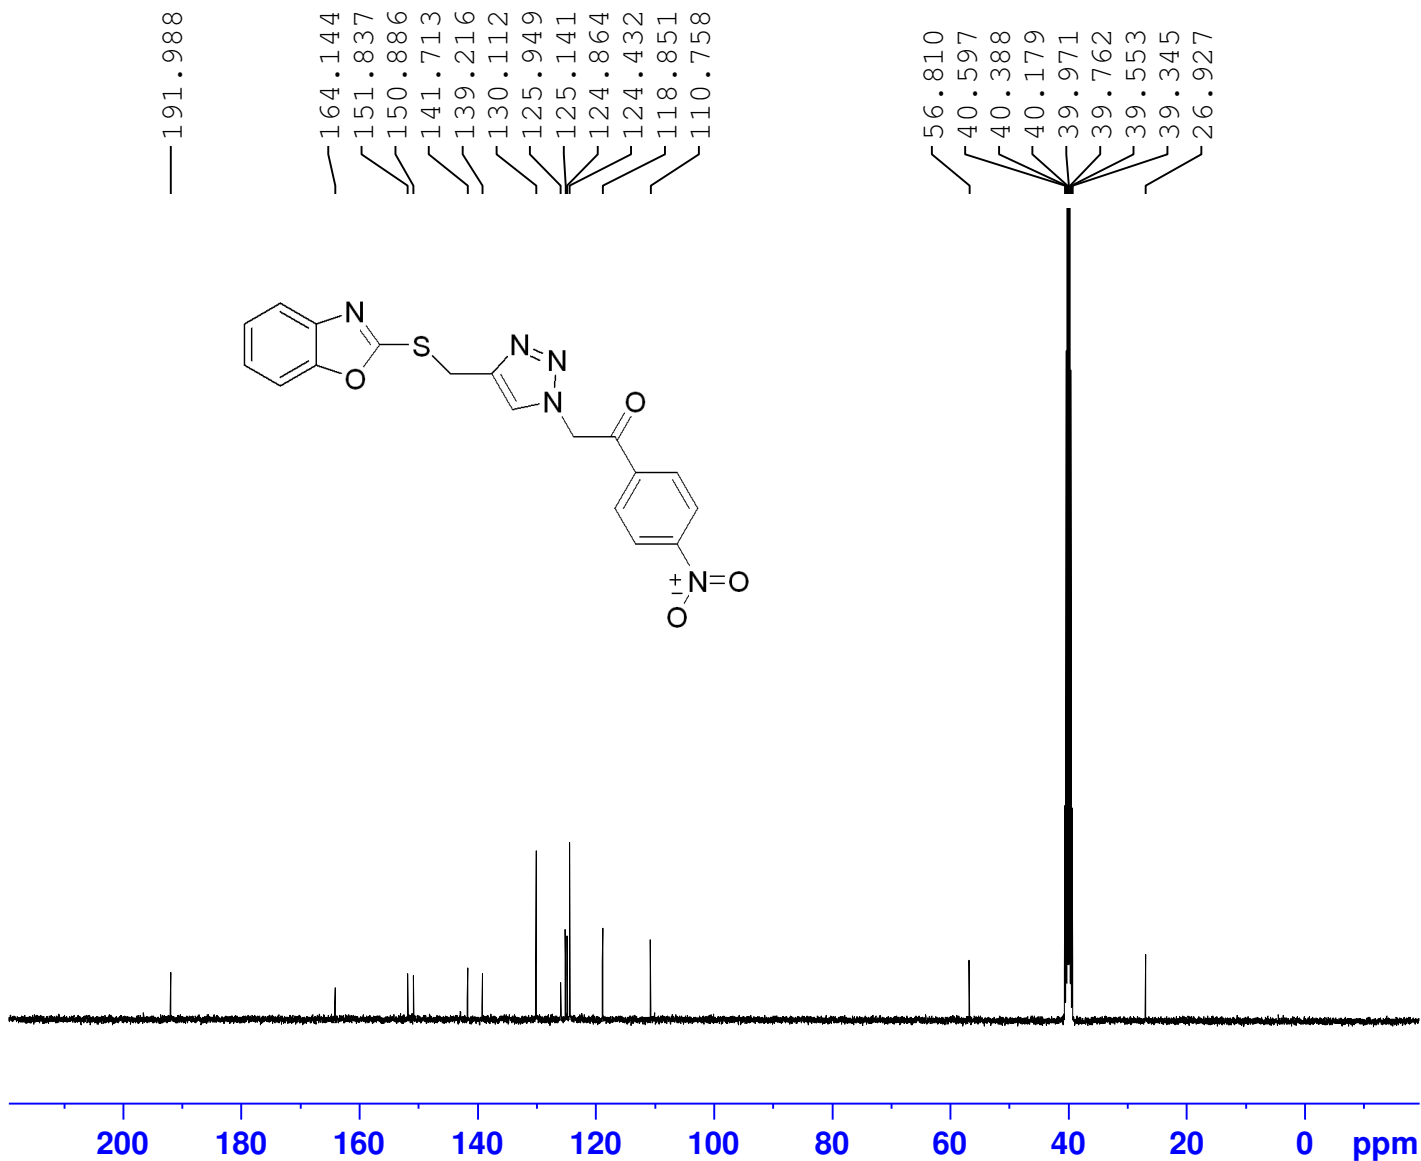

Current Data Parameters  
 NAME 23000514-4No2-PhBO  
 EXPNO 2  
 PROCNO 1

F2 - Acquisition Parameters  
 Date\_ 20230522  
 Time 12.42 h  
 INSTRUM spect  
 PROBHD Z108618\_0984 (  
 PULPROG zgpg30  
 TD 65536  
 SOLVENT DMSO  
 NS 512  
 DS 4  
 SWH 24038.461 Hz  
 FIDRES 0.733596 Hz  
 AQ 1.3631488 sec  
 RG 202.84  
 DW 20.800 usec  
 DE 6.50 usec  
 TE 297.6 K  
 D1 1.00000000 sec  
 D11 0.03000000 sec  
 TD0 1  
 SFO1 100.6680954 MHz  
 NUC1 13C  
 P0 3.33 usec  
 P1 10.00 usec  
 PLW1 51.02600098 W  
 SFO2 400.3116012 MHz  
 NUC2 1H  
 CPDPRG[2] waltz65  
 PCPD2 90.00 usec  
 PLW2 11.28999996 W  
 PLW12 0.27318001 W  
 PLW13 0.13741000 W

F2 - Processing parameters  
 SI 32768  
 SF 100.6580296 MHz  
 WDW EM  
 SSB 0  
 LB 1.00 Hz  
 GB 0  
 PC 1.40

<sup>13</sup>C NMR spectrum of 2-(4-((benzo[d]oxazol-2-ylthio)methyl)-1H-1,2,3-triazol-1-yl)-1-(4-nitrophenyl)ethan-1-one **3o** (BOP-5).

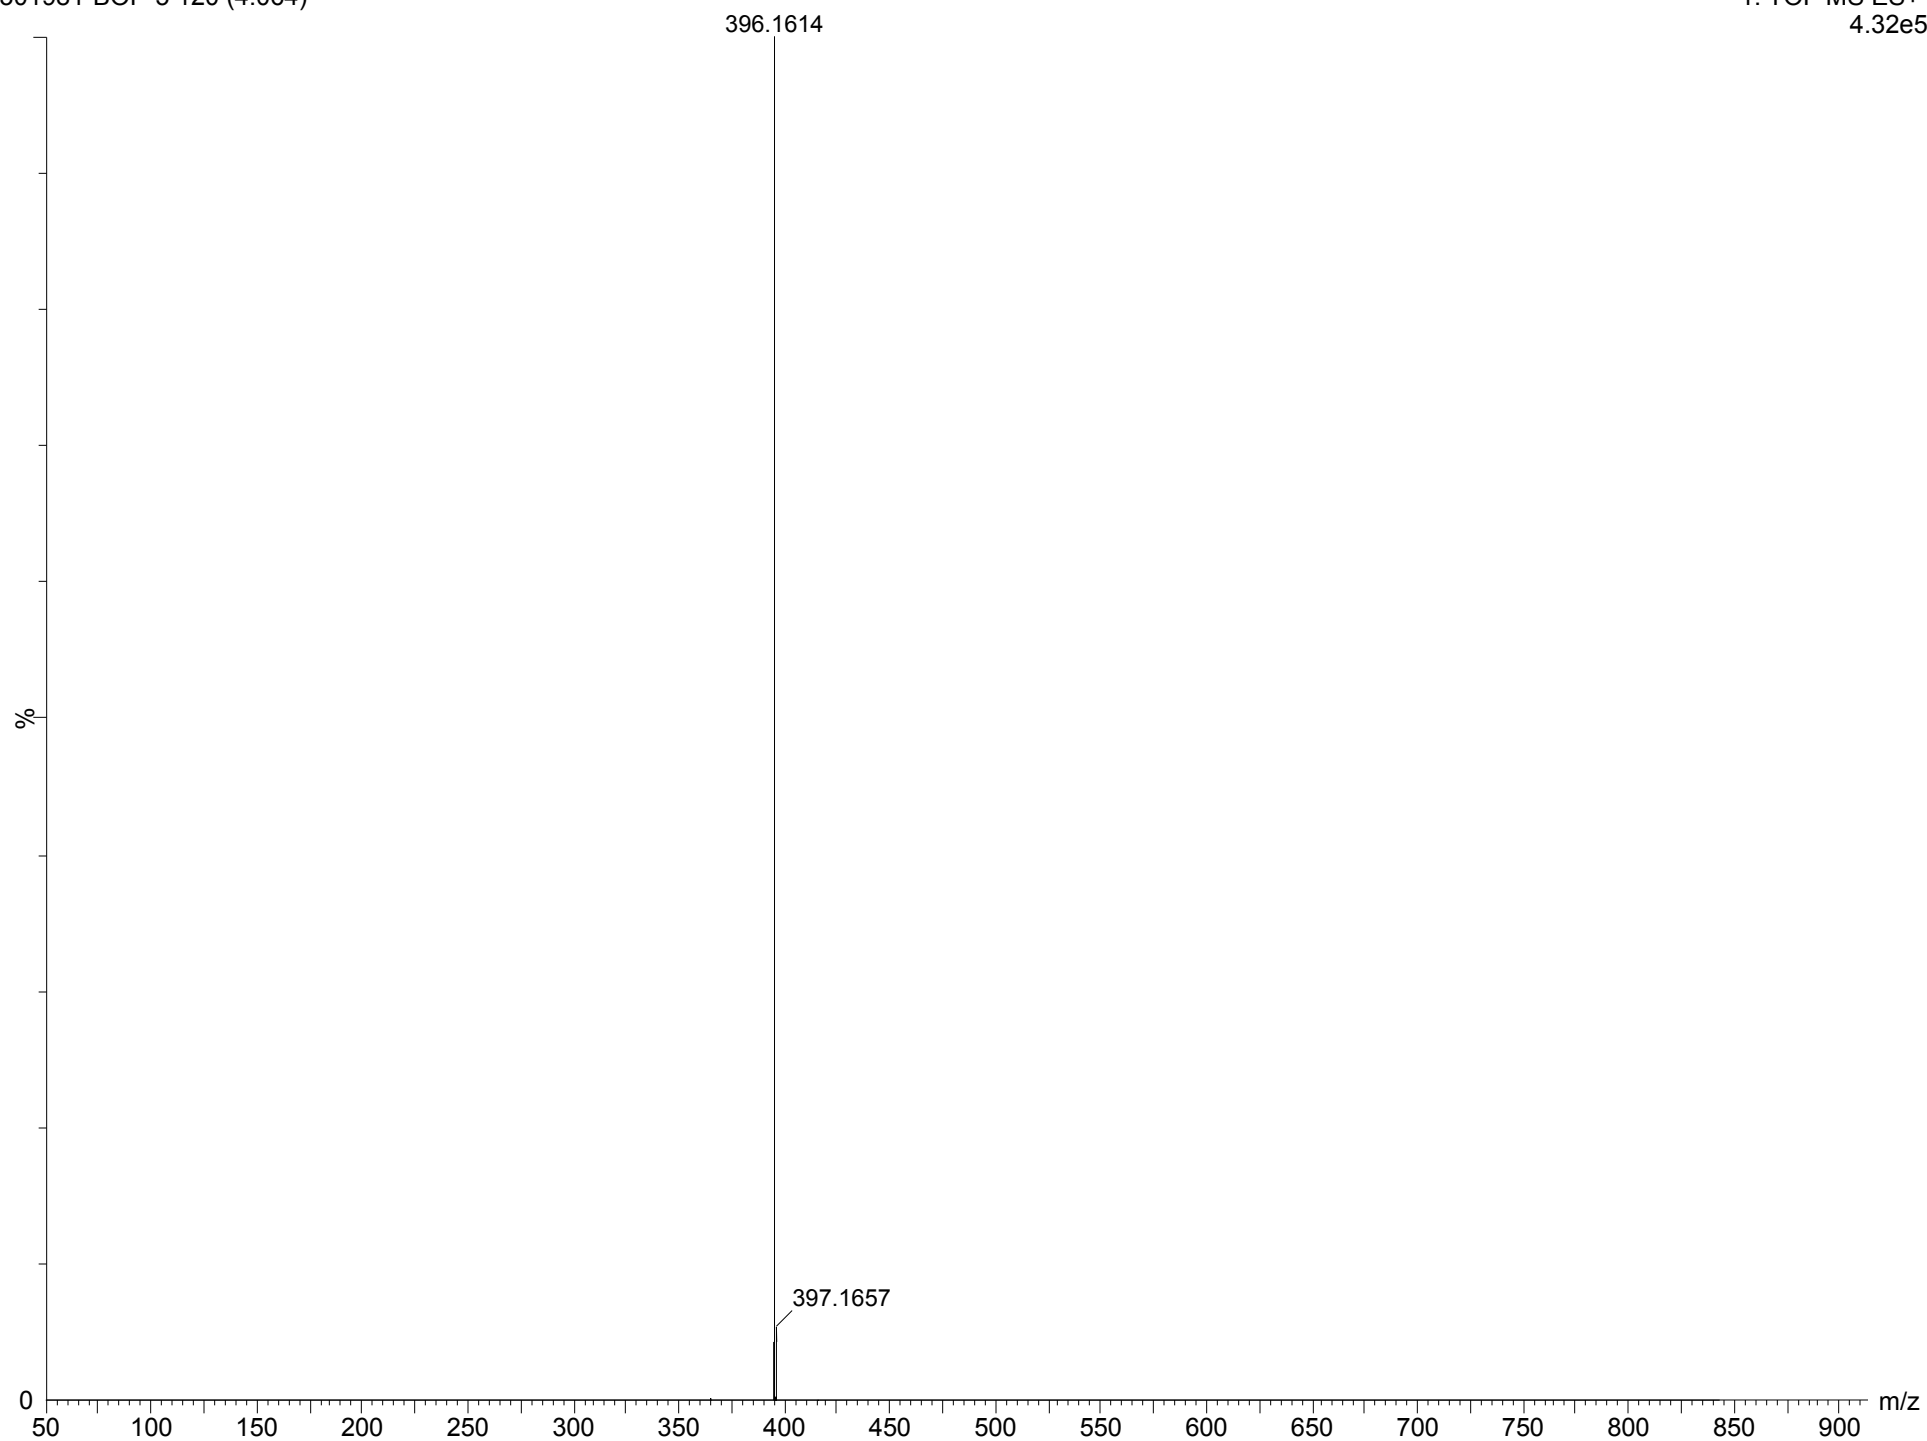

Mass spectrum of 2-(4-((benzo[d]oxazol-2-ylthio)methyl)-1H-1,2,3-triazol-1-yl)-1-(4-nitrophenyl)ethan-1-one **3o (BOP-5)**.

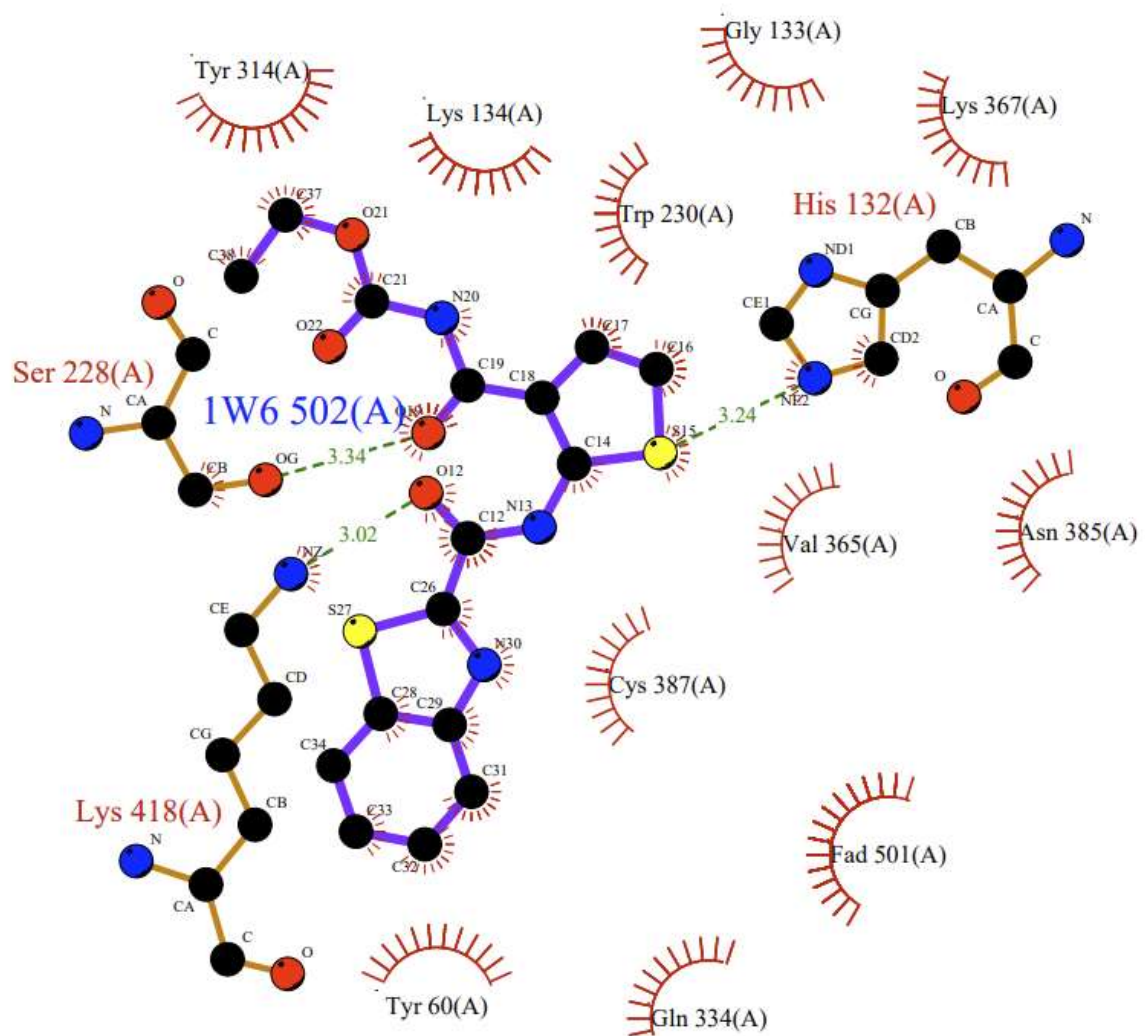

Fig. S46. DprE1 protein binding sheet for TCA-1

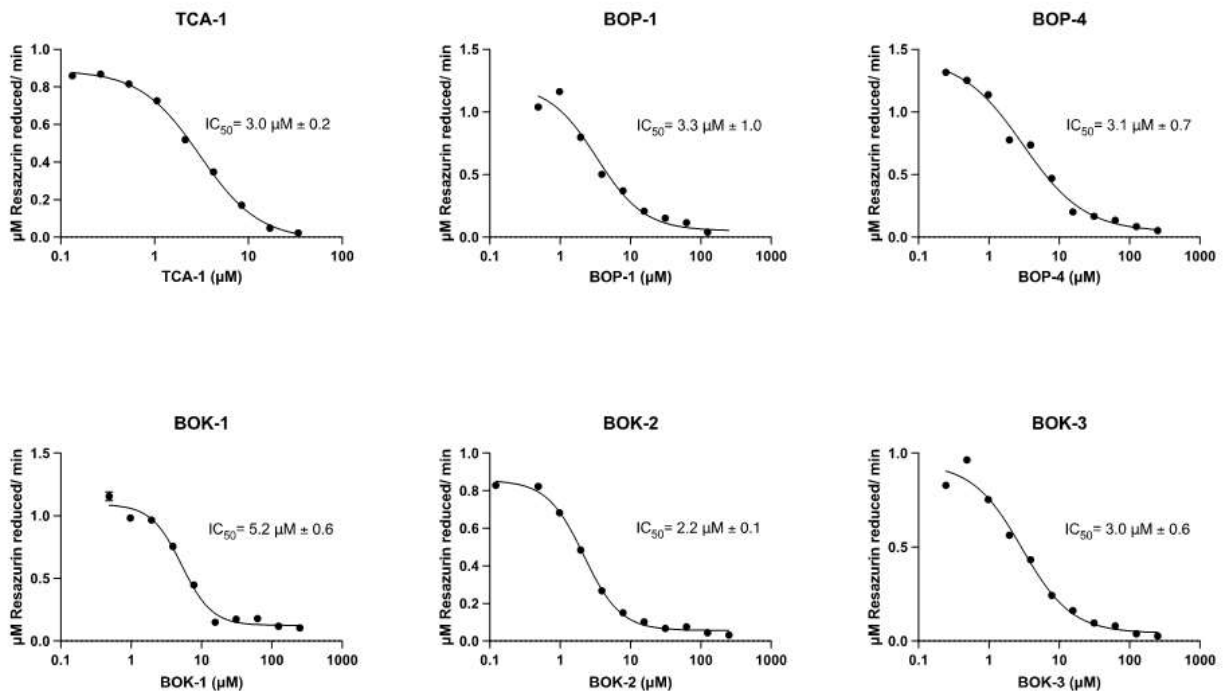

**Fig. S47. Concentration response graph of DprE1 inhibition fluorometric assay**

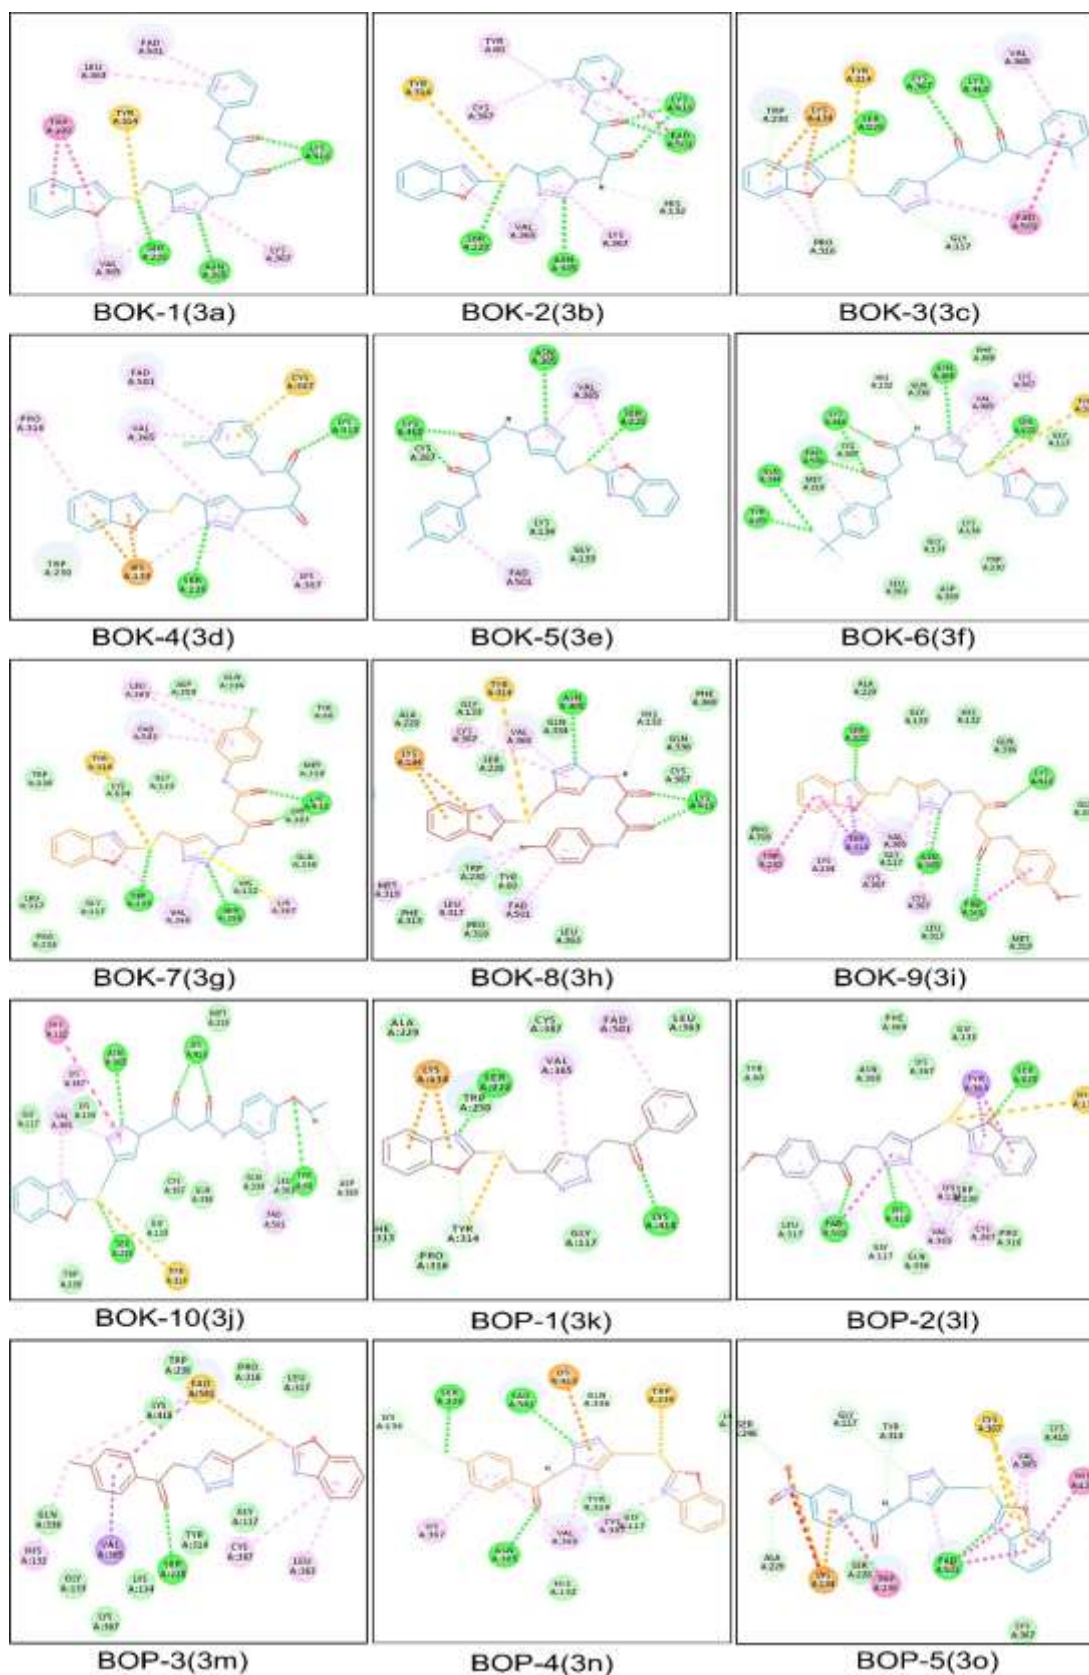

Fig. S48. 2D molecular docking interaction images of the compounds



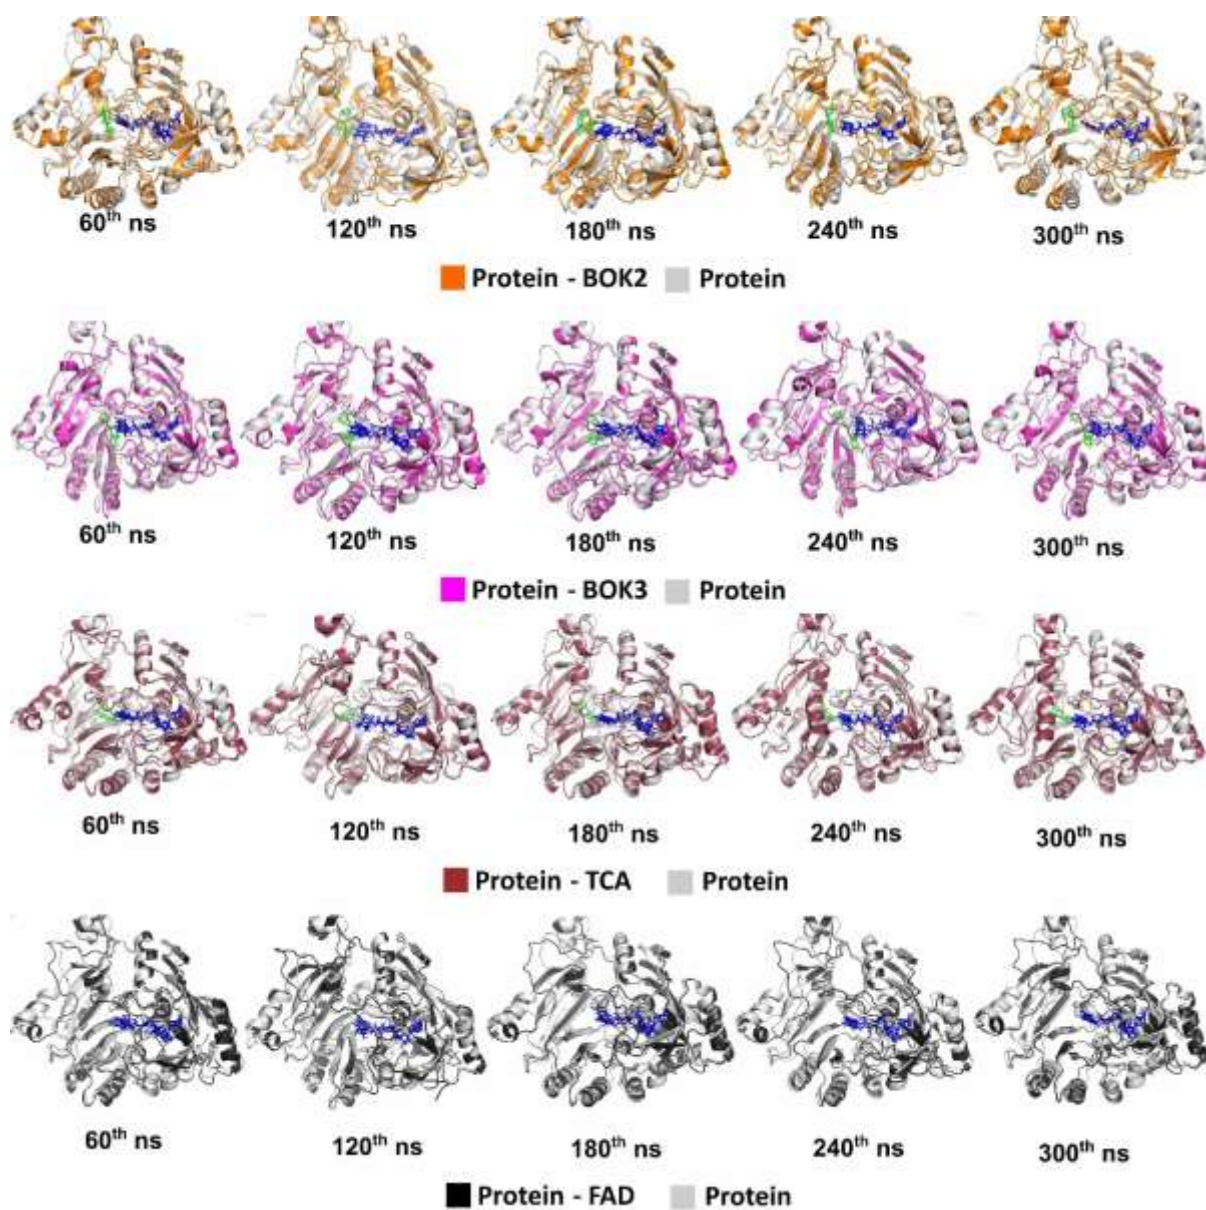

**Fig. S49 MD trajectory analysis of superimposed structures of ligand-free protein and ligand-bound protein at different time intervals.**

**Table. S1.** Molecular Docking Scores for Synthesised Compounds with Different substitutions.

| <b>S.No.</b> | <b>Compound Code</b> | <b>Substitution</b> | <b>Position of substitution</b> | <b>(-) CDocker Energy</b> | <b>(-) CDocker interaction energy</b> |
|--------------|----------------------|---------------------|---------------------------------|---------------------------|---------------------------------------|
| 1.           | BOK-4                | Chloro              | meta                            | 34.54                     | 52.72                                 |
| 2.           | BOK-5                | Methyl              | para                            | 37.58                     | 51.58                                 |
| 3.           | BOK-6                | TrimethylFluoro     | para                            | 37.49                     | 54.15                                 |
| 4.           | BOK-7                | Chloro              | para                            | 36.89                     | 52.36                                 |
| 5.           | BOK-8                | Bromo               | para                            | 35.30                     | 56.69                                 |
| 6.           | BOK-9                | Methoxy             | para                            | 33.81                     | 52.73                                 |
| 7.           | BOK-10               | Ethoxy              | para                            | 36.97                     | 53.26                                 |
| 8.           | BOP-2                | Methoxy             | para                            | 23.74                     | 44.71                                 |
| 9.           | BOP-3                | Methyl              | para                            | 25.71                     | 43.67                                 |
| 10.          | BOP-5                | Nitro               | para                            | 22.28                     | 45.95                                 |

**Table. S2** Assessment of ADMET Characteristics and Drug-likeness in Newly Synthesised

| S.No. | Ligand | MW     | RB | HBA | HBD | MR     | TPSA   | ilogP | ESOL<br>LogS | BBB | log Kp | LV | BS   | PAINS<br>alerts |
|-------|--------|--------|----|-----|-----|--------|--------|-------|--------------|-----|--------|----|------|-----------------|
| 1.    | BOK-1  | 407.45 | 9  | 6   | 1   | 108.71 | 128.21 | 2.07  | -4.37        | No  | -6.44  | 0  | 0.55 | 0               |
| 2.    | BOK-2  | 421.47 | 9  | 6   | 1   | 113.67 | 128.21 | 2.7   | -4.67        | No  | -6.26  | 0  | 0.55 | 0               |
| 3.    | BOK-3  | 425.44 | 9  | 7   | 1   | 108.66 | 128.21 | 2.54  | -4.53        | No  | -6.47  | 0  | 0.55 | 0               |
| 4.    | BOK-4  | 441.89 | 9  | 6   | 1   | 113.72 | 128.21 | 2.11  | -4.96        | No  | -6.33  | 0  | 0.55 | 0               |
| 5.    | BOK-5  | 421.47 | 9  | 6   | 1   | 113.67 | 128.21 | 2.32  | -4.67        | No  | -6.06  | 0  | 0.55 | 0               |
| 6.    | BOK-6  | 475.44 | 10 | 9   | 1   | 113.71 | 128.21 | 2.34  | -5.22        | No  | -6.60  | 0  | 0.55 | 0               |
| 7.    | BOK-7  | 441.89 | 9  | 6   | 1   | 113.72 | 128.21 | 2.28  | -4.96        | No  | -6.33  | 0  | 0.55 | 0               |
| 8.    | BOK-8  | 486.34 | 9  | 6   | 1   | 116.41 | 128.21 | 3.20  | -5.27        | No  | -6.39  | 0  | 0.55 | 0               |
| 9.    | BOK-9  | 437.47 | 10 | 7   | 1   | 115.20 | 137.44 | 3.29  | -4.44        | No  | -5.84  | 0  | 0.55 | 0               |
| 10.   | BOK-10 | 451.50 | 11 | 7   | 1   | 120.01 | 137.44 | 2.88  | -4.68        | No  | -7.27  | 0  | 0.55 | 0               |
| 11.   | BOP-1  | 350.39 | 6  | 5   | 1   | 94.77  | 99.11  | 2.74  | -4.36        | No  | -6.01  | 0  | 0.55 | 0               |
| 12.   | BOP-2  | 380.42 | 7  | 6   | 0   | 101.27 | 108.34 | 3.08  | -4.42        | No  | -5.34  | 0  | 0.55 | 0               |
| 13.   | BOP-3  | 364.42 | 6  | 5   | 0   | 99.74  | 99.11  | 3.02  | -4.65        | No  | -5.56  | 0  | 0.55 | 0               |
| 14.   | BOP-4  | 368.38 | 6  | 6   | 1   | 94.73  | 99.11  | 2.7   | -4.51        | No  | -6.05  | 0  | 0.55 | 0               |
| 15.   | BOP-5  | 395.39 | 7  | 7   | 0   | 103.60 | 144.93 | 2.31  | -4.41        | No  | -5.76  | 0  | 0.55 | 0               |
| 16.   | TCA-1  | 375.42 | 8  | 5   | 2   | 96     | 153.87 | 1.81  | -4.54        | No  | -5.79  | 0  | 0.55 | 0               |

Compounds<sup>a</sup> in comparison to a literature-reported molecule (TCA-1).

<sup>a</sup>MW = molecular weight, RB = Rotatable bonds, HBA = Hydrogen bond Acceptor, HBD = Hydrogen bond donor, MR = Molecular Refractivity, TPSA = topological polar surface area, ilogP = Octanol-water partition coefficient, ESOL logS = Aqueous Solubility, BBB = blood brain barrier, log kP = Skin Permeation, LV = Lipinski's violation, BS = Bioavailability Score, and PAINS alerts = Pan-Assay Interference.
